# Supplementary material for: Cobalt-catalyzed enantioselective reductive addition of ketimine with cyclopropyl chloride to construct chiral amino esters bearing cyclopropyl fragments
Source: Royal Society of Chemistry journal article supplement (doi:10.1039/d4qo01474j), 2024-01-01

## Supporting Information

### **Cobalt-Catalyzed Enantioselective Reductive Addition of Ketimine with Cyclopropyl Chloride to Construct the Chiral Amino Esters Bearing Cyclopropyl Fragments**

Jiangtao Hu,<sup>a</sup> Tingting Xia,<sup>a</sup> Xianqing Wu,<sup>a</sup> Hongrui Feng,<sup>a</sup> Jingping Qu<sup>a</sup> and Yifeng Chen\*  
<sub>a,b,c</sub>

a. Key Laboratory for Advanced Materials and Joint International Research Laboratory of Precision Chemistry and Molecular Engineering, Feringa Nobel Prize Scientist Joint Research Center, Frontiers Science Center for Materiobiology and Dynamic Chemistry, School of Chemistry and Molecular Engineering, East China University of Science and Technology, 130 Meilong Road, Shanghai, 200237 (China).

b. State Key Laboratory of Organometallic Chemistry, Shanghai Institute of Organic Chemistry, Chinese Academy of Sciences, Shanghai 200032 (China).

c. School of Chemistry and Chemical Engineering, Henan Normal University, Xinxiang, 453007 (China).

E-mail: yifengchen@ecust.edu.cn

## Table of Contents

|                                                                                                                                                                                         |    |
|-----------------------------------------------------------------------------------------------------------------------------------------------------------------------------------------|----|
| General Information.....                                                                                                                                                                | 3  |
| Conditions Screening.....                                                                                                                                                               | 4  |
| Experimental Procedures and Characterization Data for Substrates .....                                                                                                                  | 7  |
| Experimental Procedures of Enantioselective Reductive Addition of Ketimine to Construct the Chiral amino acids containing cyclopropane fragments and Characterization Data for Products | 10 |
| Synthetic Applications .....                                                                                                                                                            | 31 |
| Crystallographic Data .....                                                                                                                                                             | 36 |
| References.....                                                                                                                                                                         | 37 |
| NMR Spectra .....                                                                                                                                                                       | 38 |

## General Information

All reactions were carried out in dried glassware under nitrogen atmosphere and anhydrous conditions unless otherwise indicated. All manipulations of air-sensitive or moisture-sensitive compounds were performed in a glovebox under an atmosphere of nitrogen. Solvents such as toluene and THF were distilled from sodium/benzophenone, while DCM was distilled over CaH<sub>2</sub>. CoI<sub>2</sub> was purchased from Adamas. Indium was purchased from Leyan; Zinc powder (Adamas, 200 mesh) was activated with hydrochloric acid before it was used; Manganese powder (325 mesh) was purchased from Alfa Aesar; MeCN was purchased from Meryer (99.9%, SuperDry, with molecular sieves, Water  $\leq$  50 ppm (by K.F.))

Reactions were monitored by thin-layer chromatography (TLC) carried out on 0.20 mm Huanghai silica gel plates (HSGF 254) using UV light as the visualizing agent, KMnO<sub>4</sub> and PMA with heat as the developing agents. All new compounds were characterized by means of <sup>1</sup>H NMR, <sup>13</sup>C NMR and HRMS. NMR spectra were recorded using a Bruker AVANCE III 400 MHz NMR spectrometer and can be found at the end of the paper. High-resolution mass spectra (HRMS) were recorded on Q-Exactive plus mass spectrometer (Thermo Fisher, USA). HPLC was performed on SHIMADZU LC-2030 Plus. Optical rotations were recorded on digital automatic polarimeter (WZZ-2S). All <sup>1</sup>H NMR data are reported in  $\delta$  units, parts per million (ppm), and were calibrated relative to the signals for residual chloroform (7.26 ppm) in deuteriochloroform (CDCl<sub>3</sub>). All <sup>13</sup>C NMR data are reported in ppm relative to CDCl<sub>3</sub> (77.16 ppm). The following abbreviations or combinations thereof were used to explain the multiplicities: s = singlet, bs = broad singlet, d = doublet, t = triplet, q = quartet, quint = quintet, sept = septet, m = multiplet.

## Conditions Screening

**Table S1. Investigation of reductant**

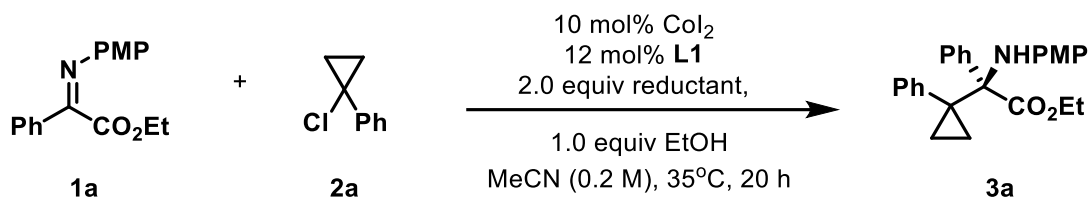

| Entry          | reductant | Conversion of <b>1a</b> (%) | yield of <b>3a</b> (%) | ee (%) |
|----------------|-----------|-----------------------------|------------------------|--------|
| 1              | Mn        | 100                         | 43                     | 99     |
| 2              | Zn        | 85                          | 30                     | 99     |
| 3              | In        | 42                          | 24                     | 99     |
| 4 <sup>a</sup> | Mn        | 100                         | 16                     | 99     |

Reaction conditions: **1a** (0.1 mmol), **2a** (0.15 mmol, 1.5 equiv),  $\text{CoI}_2$  (0.01 mmol, 10 mol %), **L1** (0.012 mmol, 12 mol %), EtOH (0.1 mmol, 1.0 equiv), reductant (0.2 mmol, 2.0 equiv), MeCN (0.5 mL, 0.2 M) under 35 °C for 20 hours. The yields were determined by  $^1\text{H}$  NMR using  $\text{CH}_2\text{Br}_2$  as an internal standard, and ee values were determined by chiral HPLC analysis on a chiral stationary phase. <sup>a</sup>without EtOH.

**Table S2. Investigation of other parameters**

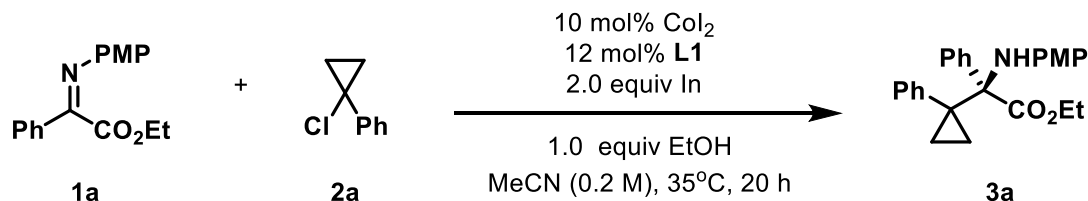

| Entry | Variation           | yield of <b>3a</b> (%) | ee (%) |
|-------|---------------------|------------------------|--------|
| 1     | none                | 24                     | 99     |
| 2     | 48 h                | 29                     | 99     |
| 3     | 50 °C               | 80                     | 99     |
| 4     | 2.0 equiv <b>2a</b> | 24                     | 99     |
| 5     | MeCN (0.4 M)        | 31                     | 99     |

Reaction conditions: **1a** (0.1 mmol), **2a** (0.15 mmol, 1.5 equiv),  $\text{CoI}_2$  (0.01 mmol, 10 mol %), **L1** (0.012 mmol, 12 mol %), EtOH (0.1 mmol, 1.0 equiv), In (0.2 mmol, 2.0 equiv), MeCN (0.5 mL, 0.2 M) under 35 °C for 20 hours. The yields were determined by  $^1\text{H}$  NMR using  $\text{CH}_2\text{Br}_2$  as an internal standard, and ee values were determined by chiral HPLC analysis on a chiral stationary phase.

**Table S3. Investigation of Temperature**

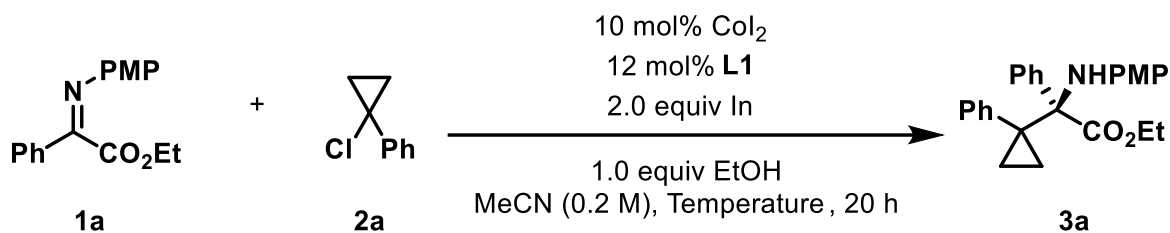

| Entry | Temperature | yield of <b>3a</b> (%) | ee (%) |
|-------|-------------|------------------------|--------|
| 1     | 35 °C       | 24                     | 99     |
| 2     | 50 °C       | 80                     | 99     |
| 3     | 80 °C       | 84                     | 97     |

Reaction conditions: **1a** (0.1 mmol), **2a** (0.15 mmol, 1.5 equiv),  $\text{CoI}_2$  (0.01 mmol, 10 mol %), **L1** (0.012 mmol, 12 mol %), **EtOH** (0.1 mmol, 1.0 equiv), **In** (0.2 mmol, 2.0 equiv),  $\text{MeCN}$  (0.5 mL, 0.2 M) for 20 hours. The yields were determined by  $^1\text{H}$  NMR using  $\text{CH}_2\text{Br}_2$  as an internal standard, and ee values were determined by chiral HPLC analysis on a chiral stationary phase.

**Table S4. Investigation of ligand**

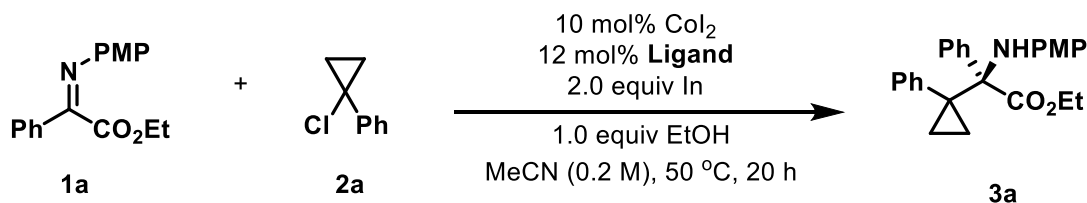

| Entry | Ligand    | yield of <b>3a</b> (%) | ee (%) |
|-------|-----------|------------------------|--------|
| 1     | <b>L1</b> | 80                     | 99     |
| 2     | <b>L2</b> | 83                     | 99     |
| 3     | <b>L3</b> | 57                     | 97     |
| 4     | <b>L4</b> | 80                     | 97     |
| 5     | <b>L5</b> | 69                     | 99     |

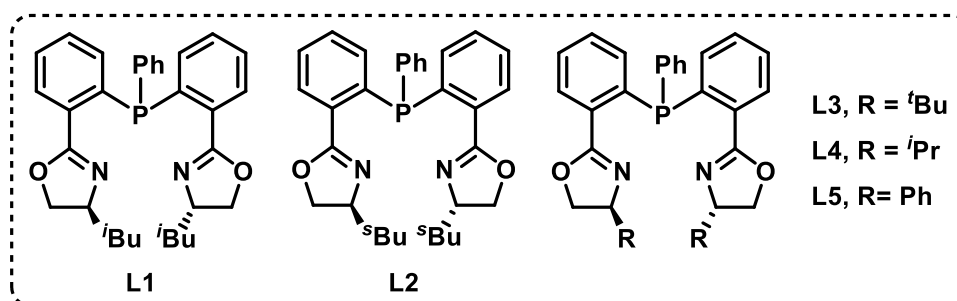

Reaction conditions: **1a** (0.1 mmol), **2a** (0.15 mmol, 1.5 equiv), CoI<sub>2</sub> (0.01 mmol, 10 mol %), **Ligand** (0.012 mmol, 12 mol %), EtOH (0.1 mmol, 1.0 equiv), In (0.2 mmol, 2.0 equiv), MeCN (0.5 mL, 0.2 M) under 50 °C for 20 hours. The yields were determined by <sup>1</sup>H NMR using CH<sub>2</sub>Br<sub>2</sub> as an internal standard, and ee values were determined by chiral HPLC analysis on a chiral stationary phase.

## Experimental Procedures and Characterization Data for Substrates

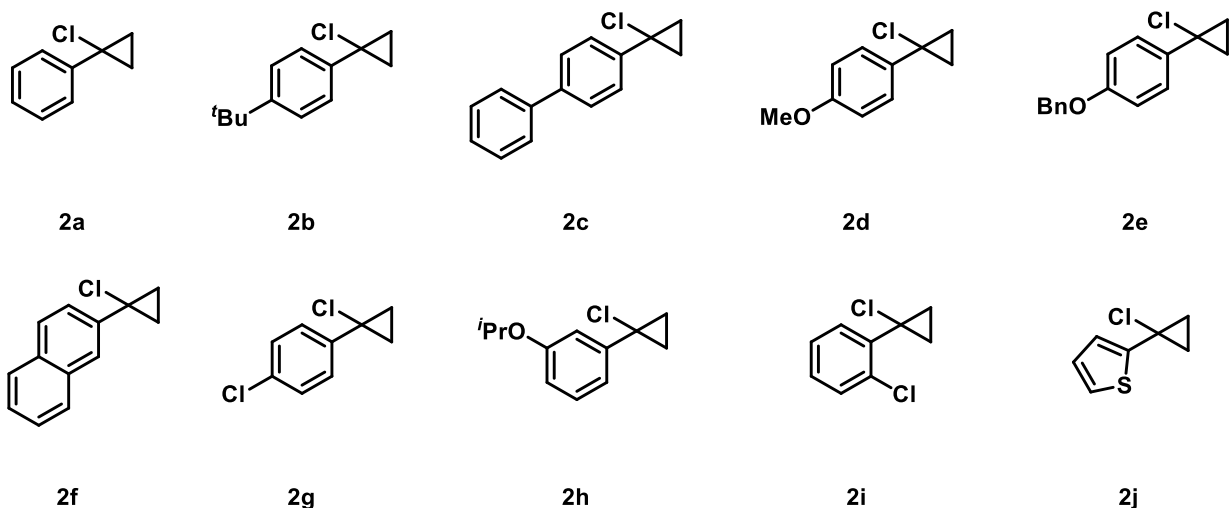

Compounds **2a**<sup>1</sup> and **2d**<sup>2</sup> were synthesized according to the literature.

### General procedure A for cyclopropyl chloride compounds synthesis

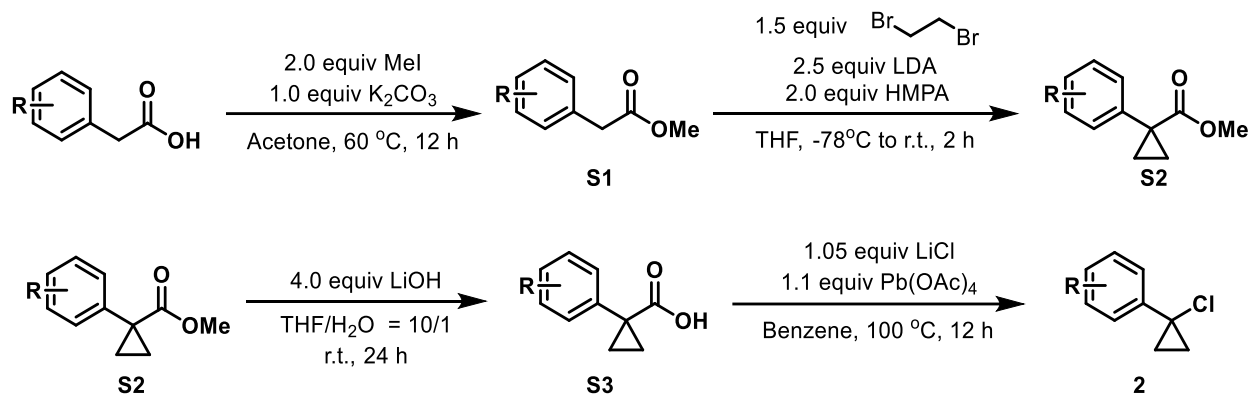

A round bottomed flask was charged with phenyl acetic acid (1.0 equiv), potassium carbonate (1.0 equiv), MeI (2.0 equiv) and acetone (0.5 M) at room temperature. The resulting mixture was heated at 60 °C and stirred for 12 h. After a complete conversion, the mixture was concentrated under reduce pressure and the residue was diluted in water, extracted by DCM. The combined organic solution was then dried over Na<sub>2</sub>SO<sub>4</sub>, filtered, concentrated under reduced pressure and the crude product **S1** was used without further purification.

The above crude product **S1** (1.0 equiv) was dissolved in dry THF (0.2 M) and cooled to -78 °C under nitrogen atmosphere. A solution of LDA (1.0 M in THF, 1.5 equiv) was added slowly and allowed to stir at -78 °C for 30 min. The resulting mixture was warmed to 0 °C and HMPA (2.0 equiv) was added slowly. After stirring for 30 min at 0 °C, 1,2-dibromoethane (1.5 equiv) was added dropwise to the solution, stirred for 30 min at 0 °C and then stirred for 30 min at room temperature. After a complete conversion (monitored by TLC), the reaction was quenched with

saturated aqueous  $\text{NH}_4\text{Cl}$ , extracted with EtOAc, dried with  $\text{Na}_2\text{SO}_4$  and concentrated under reduced pressure. The residue was purified by chromatography to afford the product **S2**.

To a solution of **S2** (1.0 equiv) in THF/ $\text{H}_2\text{O}$  (v/v = 10/1, 0.5 M) was added LiOH (4.0 equiv). The reaction mixture was stirred at room temperature overnight. After completion, the reaction was diluted with water and acidified with 2M HCl to pH = 1. The aqueous was extracted with EtOAc, dried over  $\text{Na}_2\text{SO}_4$ , filtered and concentrated under reduced pressure. The resulting acid **S3** was used without further purification.

To a solution of **S3** (1.0 equiv) in benzene (0.33 M) was added LiCl (1.05 equiv) and  $\text{Pb}(\text{OAc})_4$  (1.1 equiv) under nitrogen atmosphere, and then the mixture was stirred at room temperature until it became nearly homogeneous. Next, the resulting reaction was stirred for 12 h at 100 °C. After completion, the mixture was quenched with saturated aqueous  $\text{NaHCO}_3$ , filtered and the filter cake was washed with EtOAc. The aqueous was extracted with EtOAc, dried over  $\text{Na}_2\text{SO}_4$ , filtered and concentrated under reduced pressure. The crude product was purified via silica gel column chromatography to give cyclopropyl chloride **2**.

Characterization data for cyclopropyl chloride substrates:

#### 1-(Tert-butyl)-4-(1-chlorocyclopropyl)benzene (**2b**)

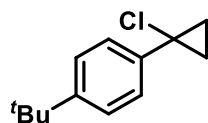

General procedure A was followed on 2.5 mmol scale and purification by flash column chromatography on silica gel (PE) to afford **2b** as a colorless oil (188 mg, 36%).  $R_f = 0.83$  (PE);

$^1\text{H NMR}$  (400 MHz,  $\text{CDCl}_3$ ):  $\delta$  7.36–7.29 (m, 4H), 1.41–1.37 (m, 2H), 1.26 (s, 9H), 1.23–1.20 (m, 2H);

$^{13}\text{C NMR}$  (100 MHz,  $\text{CDCl}_3$ ):  $\delta$  150.9, 139.2, 127.5, 125.5, 43.4, 34.7, 31.4, 17.5;

**HRMS (ESI):**  $[\text{M}+\text{H}]^+$  Calcd for  $\text{C}_{13}\text{H}_{18}\text{Cl}^+$ : 209.1092; found: 209.1095.

#### 4-(1-Chlorocyclopropyl)-1,1'-biphenyl (**2c**) HJT-4-137

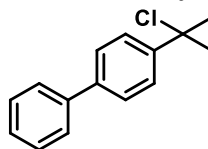

General procedure A was followed on 1.5 mmol scale and purification by flash column chromatography on silica gel (PE) to afford **2c** as a white solid (155 mg, 45%).  $R_f = 0.65$  (PE);

$^1\text{H NMR}$  (400 MHz,  $\text{CDCl}_3$ ):  $\delta$  7.62–7.55 (m, 6H), 7.47 (t,  $J = 7.2$  Hz, 2H), 7.38 (t,  $J = 7.2$  Hz, 1H), 1.56–1.52 (m, 2H), 1.38–1.35 (m, 2H);

$^{13}\text{C NMR}$  (100 MHz,  $\text{CDCl}_3$ ):  $\delta$  141.2, 140.8, 140.7, 128.9, 128.1, 127.6, 127.3, 127.2, 43.3, 17.8;

**HRMS (ESI):**  $[\text{M}+\text{K}]^+$  Calcd for  $\text{C}_{15}\text{H}_{13}\text{ClK}^+$ : 267.0337; found: 267.0329.

#### 1-(Benzyloxy)-4-(1-chlorocyclopropyl)benzene (**2e**)

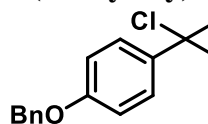

General procedure A was followed on 2.4 mmol scale and purification by flash column chromatography on silica gel (PE) to afford **2e** as a white solid (175 mg, 28%).  $R_f = 0.35$  (PE);

$^1\text{H NMR}$  (400 MHz,  $\text{CDCl}_3$ ):  $\delta$  7.46–7.38 (m, 6H), 7.37–7.33 (m, 1H), 6.95 (d,  $J = 8.8$  Hz, 2H), 5.07 (s, 2H), 1.46–1.43 (m, 2H), 1.26–1.23 (m, 2H);

$^{13}\text{C NMR}$  (100 MHz,  $\text{CDCl}_3$ ):  $\delta$  158.5, 137.0, 134.8, 129.5, 128.7, 128.1, 127.6, 114.8, 70.2, 43.5, 17.3;

**HRMS (ESI):**  $[\text{M}+\text{H}]^+$  Calcd for  $\text{C}_{16}\text{H}_{16}\text{ClO}^+$ : 259.0884; found: 259.0884.



### 2-(1-Chlorocyclopropyl)naphthalene (2f)

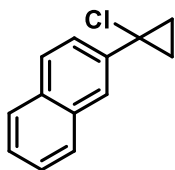

General procedure A was followed on 2.5 mmol scale and purification by flash column chromatography on silica gel (PE) to afford **2f** as a white solid (195 mg, 38%).  $R_f = 0.77$  (PE);

$^1\text{H NMR}$  (400 MHz,  $\text{CDCl}_3$ ):  $\delta$  7.91 (d,  $J = 2.0$  Hz, 1H), 7.85–7.82 (m, 3H), 7.61 (dd,  $J = 8.8, 2.0$  Hz, 1H), 7.53–7.47 (m, 2H), 1.58–1.55 (m, 2H), 1.43–1.40 (m, 2H);

$^{13}\text{C NMR}$  (100 MHz,  $\text{CDCl}_3$ ):  $\delta$  139.4, 133.2, 132.9, 128.5, 128.2, 127.7, 126.5, 126.4, 126.3, 126.0, 43.8, 17.6;

**HRMS (ESI)**:  $[\text{M}+\text{H}]^+$  Calcd for  $\text{C}_{13}\text{H}_{12}\text{Cl}^+$ : 203.0622; found: 203.0624.

### 1-Chloro-4-(1-chlorocyclopropyl)benzene (2g)

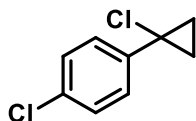

General procedure A was followed on 2.5 mmol scale and purification by flash column chromatography on silica gel (PE) to afford **2g** as a colourless oil (207 mg, 44%).  $R_f = 0.83$  (PE);

$^1\text{H NMR}$  (400 MHz,  $\text{CDCl}_3$ ):  $\delta$  7.40 (d,  $J = 8.4$  Hz, 2H), 7.30 (d,  $J = 8.4$  Hz, 2H), 1.50–1.47 (m, 2H), 1.29–1.25 (m, 2H);

$^{13}\text{C NMR}$  (100 MHz,  $\text{CDCl}_3$ ):  $\delta$  140.7, 133.7, 129.2, 128.7, 42.7, 17.8;

**HRMS (ESI)**:  $[\text{M}+\text{H}]^+$  Calcd for  $\text{C}_9\text{H}_9\text{Cl}_2^+$ : 187.0076; found: 187.0082.

### 1-Chloro-2-(1-chlorocyclopropyl)benzene (2h)

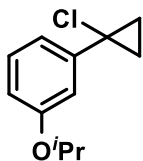

General procedure A was followed on 2.5 mmol scale and purification by flash column chromatography on silica gel (PE) to afford **2h** as a colourless oil (302 mg, 57%).  $R_f = 0.68$  (PE);

$^1\text{H NMR}$  (400 MHz,  $\text{CDCl}_3$ ):  $\delta$  7.21 (t,  $J = 8.0$  Hz, 1H), 7.00–6.97 (m, 2H), 6.77 (ddd,  $J = 8.4, 2.8, 0.8$  Hz, 1H), 4.55 (sept,  $J = 6.0$  Hz, 1H), 1.45–1.42 (m, 2H), 1.33 (d,  $J = 6.0$  Hz, 6H), 1.29–1.25 (m, 2H);

$^{13}\text{C NMR}$  (100 MHz,  $\text{CDCl}_3$ ):  $\delta$  158.0, 143.7, 129.6, 119.6, 115.6, 114.9, 69.9, 43.4, 22.1, 17.8;

**HRMS (ESI)**:  $[\text{M}+\text{H}]^+$  Calcd for  $\text{C}_{12}\text{H}_{16}\text{ClO}^+$ : 211.0884; found: 211.0882.

### 1-Chloro-2-(1-chlorocyclopropyl)benzene (2i)

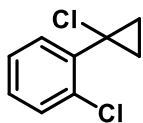

General procedure A was followed on 1.5 mmol scale and purification by flash column chromatography on silica gel (PE) to afford **2i** as a colourless oil (111 mg, 40%).  $R_f = 0.63$  (PE);

$^1\text{H NMR}$  (400 MHz,  $\text{CDCl}_3$ ):  $\delta$  7.52–7.48 (m, 1H), 7.44–7.39 (m, 1H), 7.30–7.23 (m, 2H), 1.56–1.53 (m, 2H), 1.32–1.29 (m, 2H);

$^{13}\text{C NMR}$  (100 MHz,  $\text{CDCl}_3$ ):  $\delta$  139.2, 136.2, 131.2, 130.3, 129.8, 127.0, 42.0, 17.3;

**HRMS (ESI)**:  $[\text{M}+\text{H}]^+$  Calcd for  $\text{C}_9\text{H}_9\text{Cl}_2^+$ : 187.0076; found: 187.0079.

### 2-(1-Chlorocyclopropyl)thiophene (2j)

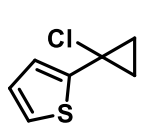

General procedure A was followed on 2.5 mmol scale and purification by flash column chromatography on silica gel (PE) to afford **2j** as a colorless oil (265 mg, 67%).  $R_f = 0.79$  (PE);

$^1\text{H NMR}$  (400 MHz,  $\text{CDCl}_3$ ):  $\delta$  7.21 (dd,  $J = 5.2, 1.6$  Hz, 1H), 6.97 (dd,  $J = 3.6, 1.6$  Hz, 1H), 6.93 (dd,  $J = 5.2, 3.6$  Hz, 1H), 1.78 (q,  $J = 4.4$  Hz, 2H), 1.41 (q,  $J = 4.0$  Hz, 2H);

$^{13}\text{C NMR}$  (100 MHz,  $\text{CDCl}_3$ ): 142.4, 127.2, 126.5, 125.4, 23.5, 20.3;

**HRMS (ESI)**:  $[\text{M}+\text{Na}]^+$  Calcd for  $\text{C}_7\text{H}_7\text{ClSNa}^+$ : 180.9849; found: 180.9842.

## Experimental Procedures of Synthetic Method and Characterization Data for Products

### General procedure B for Cobalt-Catalyzed Enantioselective Reductive Addition of Ketimine with Cyclopropyl Chloride to Construct the Chiral Amino Acids Bearing Cyclopropyl Fragments

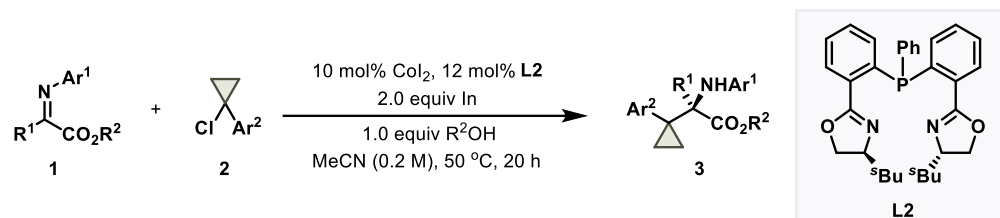

To an oven-dried 8 mL vial equipped with a magnetic stir bar were added ligand **L2** (12 mol%), **In** (2.0 equiv) and imine **1** (1.0 equiv). Then the vial was transferred into the glovebox,  $\text{Co}_2$  (10 mol%), MeCN (0.2 M), cyclopropyl chloride compounds **2** (1.5 equiv) and  $\text{R}^2\text{OH}$  (1.0 equiv) were added in sequence (To avoid transesterification between imine **1** and alcohol, the type of alcohol should be the same as that of protecting group of  $\alpha$ -imino ester). The reaction vial was capped and stirred at 50 °C for 20 hours. After completion, the reaction mixture was filtered through a pad of silica gel and the filter cake was washed with EtOAc. The resulted filtrate was then concentrated under reduced pressure to give the crude product, which was purified by silica gel flash column chromatography to afford products **3**.

#### Characterization data for products:

##### **Ethyl (*R*)-2-((4-methoxyphenyl)amino)-2-phenyl-2-(1-phenylcyclopropyl)acetate (**3a**)**

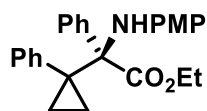

General procedure B was followed using **2a** as an electrophile on 0.2 mmol scale. The reaction mixture was purified by flash column chromatography (silica gel, PE/EtOAc = 20/1~10/1) to afford **3a** as a white solid (62.2 mg, 78%);  $R_f$  = 0.69 (PE/EtOAc = 10/1);

$^1\text{H NMR}$  (400 MHz,  $\text{CDCl}_3$ ):  $\delta$  7.79–7.76 (m, 2H), 7.24–7.26 (m, 3H), 7.19–7.13 (m, 5H), 6.55 (d,  $J$  = 8.8 Hz, 2H), 6.21 (d,  $J$  = 9.2 Hz, 2H), 4.58 (bs, 1H), 4.03 (dq,  $J$  = 10.8, 7.2 Hz, 1H), 3.90 (dq,  $J$  = 10.4, 7.2 Hz, 1H), 3.64 (s, 3H), 1.27–1.24 (m, 1H), 1.03–1.00 (m, 1H), 0.90 (t,  $J$  = 7.2 Hz, 3H), 0.86–0.79 (m, 2H);

$^{13}\text{C NMR}$  (100 MHz,  $\text{CDCl}_3$ ):  $\delta$  172.7, 152.2, 142.2, 140.5, 137.5, 131.8, 129.8, 127.8, 127.42, 127.39, 127.3, 116.6, 114.0, 70.2, 61.0, 55.7, 35.7, 13.8, 10.9, 10.5.

**HRMS (ESI)**:  $[\text{M}+\text{H}]^+$  Calcd for  $\text{C}_{26}\text{H}_{28}\text{NO}_3^+$ : 402.2064; found: 402.2064;

**HPLC** (Chiralpak AD-H): *n*-Hexane/*i*-PrOH = 99/1, flow rate 1.0 mL/min,  $T$  = 30 °C,  $\lambda$  = 254 nm,  $t_{R1}$  = 13.520 min (minor),  $t_{R2}$  = 20.607 min (major); 99% ee;  $[\alpha]_D^{33.5}$  = 105.45 ( $c$  = 0.27,  $\text{CH}_2\text{Cl}_2$ ).

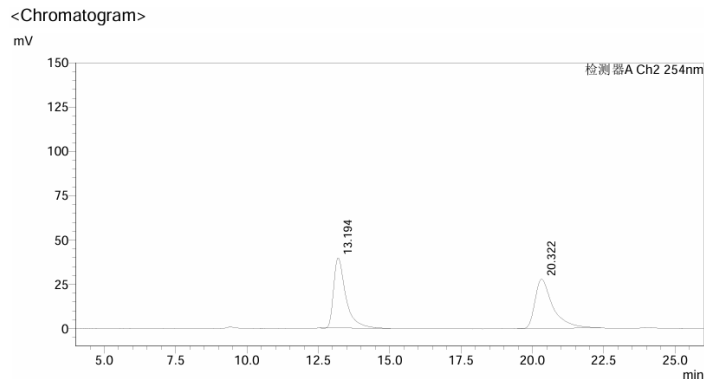

<Peak Table>

| 检测器A Ch2 254nm |           |         |        |        |      |      |
|----------------|-----------|---------|--------|--------|------|------|
| Peak#          | Ret. Time | Area    | Height | Conc.  | Unit | Mark |
| 1              | 13.194    | 1177540 | 39566  | 49.254 |      | M    |
| 2              | 20.322    | 1213210 | 27750  | 50.746 |      | M    |
| 总计             |           | 2390750 | 67316  |        |      |      |

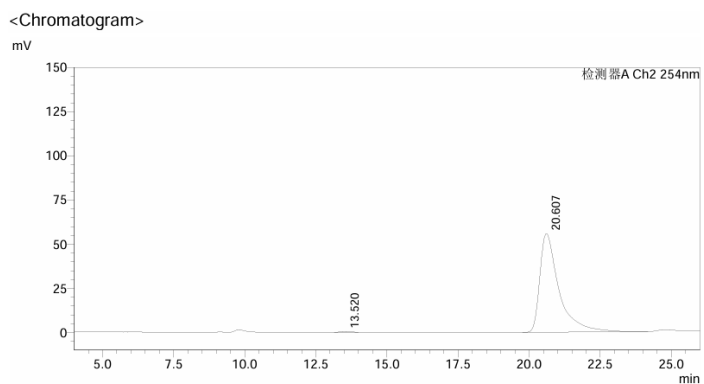

<Peak Table>

| 检测器A Ch2 254nm |           |         |        |        |      |      |
|----------------|-----------|---------|--------|--------|------|------|
| Peak#          | Ret. Time | Area    | Height | Conc.  | Unit | Mark |
| 1              | 13.520    | 10627   | 432    | 0.404  |      | M    |
| 2              | 20.607    | 2619292 | 55776  | 99.596 |      | M    |
| 总计             |           | 2629919 | 56208  |        |      |      |

### Methyl (*R*)-2-((4-methoxyphenyl)amino)-2-phenyl-2-(1-phenylcyclopropyl)acetate (**3b**)

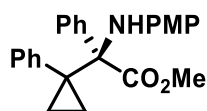

General procedure B was followed using **2a** as an electrophile on 0.2 mmol scale. The reaction mixture was purified by flash column chromatography (silica gel, PE/EtOAc = 20/1~10/1) to afford **3a** as a white solid (62.7 mg, 81%);  $R_f$  = 0.60 (PE/EtOAc = 10/1);

$^1\text{H NMR}$  (400 MHz,  $\text{CDCl}_3$ ):  $\delta$  7.80–7.77 (m, 2H), 7.27–7.25 (m, 3H), 7.22–7.16 (m, 5H), 6.56 (d,  $J$  = 9.2 Hz, 2H), 6.21 (d,  $J$  = 8.8 Hz, 2H), 4.61 (bs, 1H), 3.66 (s, 3H), 3.52 (s, 3H), 1.23 (dt,  $J$  = 9.6, 3.2 Hz, 1H), 1.00 (dt,  $J$  = 10.0, 2.8 Hz, 1H), 0.87–0.80 (m, 2H);

$^{13}\text{C NMR}$  (100 MHz,  $\text{CDCl}_3$ ):  $\delta$  173.4, 152.1, 142.1, 140.1, 137.1, 131.7, 129.7, 127.9, 127.48, 127.46, 127.4, 116.5, 114.0, 70.2, 55.6, 51.9, 35.7, 10.8, 10.5;

**HRMS (ESI)**:  $[\text{M}+\text{H}]^+$  Calcd for  $\text{C}_{25}\text{H}_{26}\text{NO}_3^+$ : 388.1907; found: 388.1907;

**HPLC** (Chiralpak AD-H): *n*-Hexane/*i*-PrOH = 99/1, flow rate 1.0 mL/min,  $T$  = 30 °C,  $\lambda$  = 254 nm,  $t_{R1}$  = 13.033 min (minor),  $t_{R2}$  = 15.279 min (major); 99% ee;  $[\alpha]_D^{33.5}$  = 109.09 ( $c$  = 0.15,  $\text{CH}_2\text{Cl}_2$ ).

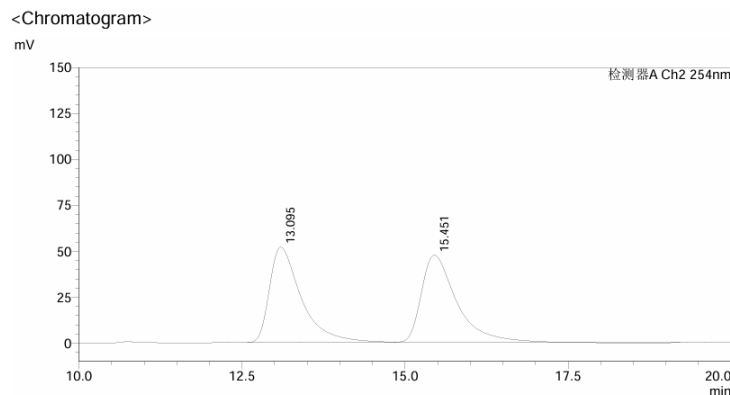

<Peak Table>

| 检测器A Ch2 254nm |           |         |        |        |      |      |
|----------------|-----------|---------|--------|--------|------|------|
| Peak#          | Ret. Time | Area    | Height | Conc.  | Unit | Mark |
| 1              | 13.095    | 1770609 | 51918  | 49.835 |      | M    |
| 2              | 15.451    | 1782339 | 47451  | 50.165 |      | V M  |
| 总计             |           | 3552948 | 99369  |        |      |      |

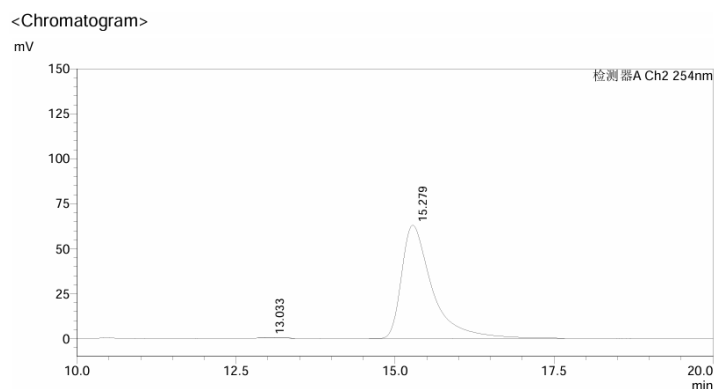

<Peak Table>

| 检测器A Ch2 254nm |           |         |        |        |      |      |
|----------------|-----------|---------|--------|--------|------|------|
| Peak#          | Ret. Time | Area    | Height | Conc.  | Unit | Mark |
| 1              | 13.033    | 6017    | 334    | 0.284  |      | M    |
| 2              | 15.279    | 2111195 | 62893  | 99.716 |      | M    |
| 总计             |           | 2117212 | 63227  |        |      |      |

### Ethyl (*R*)-2-((4-methoxyphenyl)amino)-2-(naphthalen-2-yl)-2-(1-phenylcyclopropyl)acetate (**3c**)

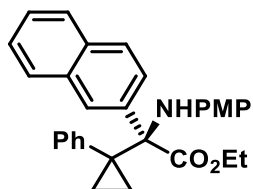

General procedure B was followed using **2a** as an electrophile on 0.2 mmol scale. The reaction mixture was purified by flash column chromatography (silica gel, PE/EtOAc = 20/1~15/1) to afford **3c** as a white solid (70.5 mg, 78%);  $R_f = 0.69$  (PE/EtOAc = 10/1);

$^1\text{H NMR}$  (400 MHz,  $\text{CDCl}_3$ ):  $\delta$  8.38 (s, 1H), 7.92 (dd,  $J = 8.8, 2.0$  Hz, 1H), 7.83–7.79 (m, 2H), 7.72 (d,  $J = 8.8$  Hz, 1H), 7.50–7.43 (m, 2H), 7.21–7.17 (m, 5H), 6.52 (d,  $J = 8.8$  Hz, 2H), 6.24 (d,  $J = 8.8$  Hz, 2H), 4.67 (bs, 1H), 4.07 (dq,  $J = 10.8, 7.2$  Hz, 1H), 3.93 (dq,  $J = 10.8, 7.2$  Hz, 1H), 3.63 (s, 3H), 1.31–1.28 (m, 1H), 1.05–1.02 (m, 1H), 0.92 (t,  $J = 7.2$  Hz, 3H), 0.88–0.82 (m, 2H);

$^{13}\text{C NMR}$  (100 MHz,  $\text{CDCl}_3$ ):  $\delta$  172.8, 152.2, 142.1, 140.5, 135.1, 132.9, 132.7, 131.8, 129.1, 128.9, 127.90, 127.85, 127.4, 127.3, 126.7, 126.2, 125.7, 116.7, 114.0, 70.2, 61.0, 55.6, 35.6, 13.8, 11.0, 10.4;

**HRMS (ESI)**:  $[\text{M}+\text{H}]^+$  Calcd for  $\text{C}_{30}\text{H}_{30}\text{NO}_3^+$ : 452.2220; found: 452.2220;

**HPLC** (Chiralpak IA): *n*-Hexane/*i*-PrOH = 99/1, flow rate 1.0 mL/min,  $T = 30$  °C,  $\lambda = 245$  nm,  $t_{R1} = 8.518$  min (minor),  $t_{R2} = 13.514$  min (major); 99% ee;  $[\alpha]_D^{33.5} = 105.45$  ( $c = 0.15$ ,  $\text{CH}_2\text{Cl}_2$ ).

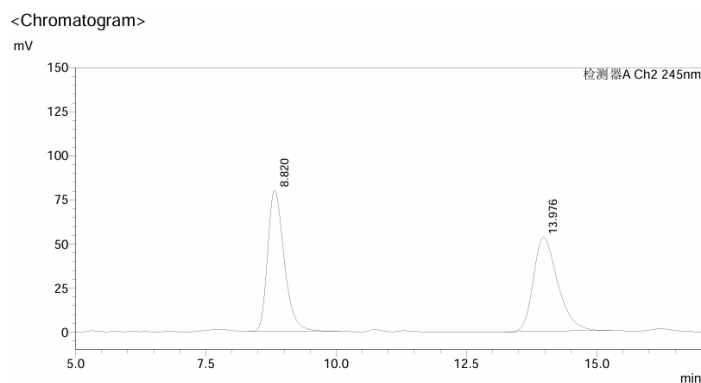

<Peak Table>

| Peak# | Ret. Time | Area    | Height | Conc.  | Unit | Mark |
|-------|-----------|---------|--------|--------|------|------|
| 1     | 8.820     | 1765129 | 80031  | 50.447 |      | M    |
| 2     | 13.976    | 1733864 | 53191  | 49.553 |      | M    |
| 总计    |           | 3498993 | 133222 |        |      |      |

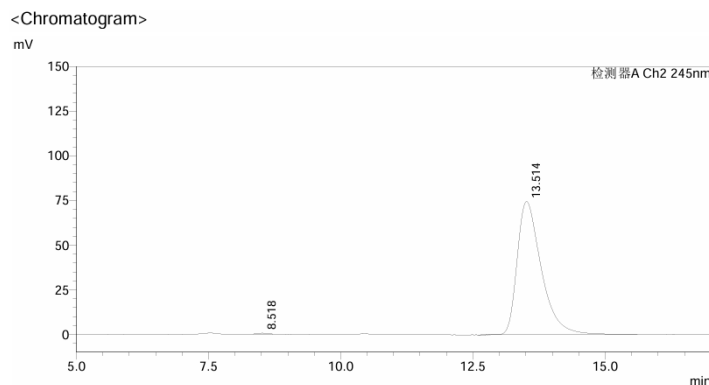

<Peak Table>

| Peak# | Ret. Time | Area    | Height | Conc.  | Unit | Mark |
|-------|-----------|---------|--------|--------|------|------|
| 1     | 8.518     | 6441    | 510    | 0.271  |      | M    |
| 2     | 13.514    | 2366716 | 74519  | 99.729 |      | M    |
| 总计    |           | 2373157 | 75030  |        |      |      |

**Ethyl (R)-2-(benzo[d][1,3]dioxol-5-yl)-2-((4-methoxyphenyl)amino)-2-(1-phenylcyclopropyl)acetate (3d)**

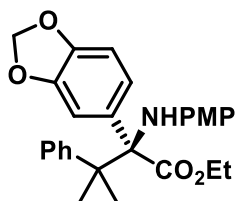

General procedure B was followed using **2a** as an electrophile on 0.2 mmol scale. The reaction mixture was purified by flash column chromatography (silica gel, PE/EtOAc = 20/1~10/1) to afford **3d** as a white solid (76.4 mg, 86%);  $R_f = 0.68$  (PE/EtOAc = 10/1);

$^1\text{H NMR}$  (400 MHz,  $\text{CDCl}_3$ ):  $\delta$  7.41 (d,  $J = 2.0$  Hz, 1H), 7.27 (dd,  $J = 8.8, 2.0$  Hz, 1H), 7.22–7.17 (m, 5H), 6.67 (d,  $J = 8$  Hz, 1H), 6.56 (d,  $J = 9.2$  Hz, 2H), 6.23 (d,  $J = 8.8$  Hz, 2H), 5.93 (abq,  $J = 4.8, 1.2$  Hz, 2H), 4.56 (bs, 1H), 4.01 (dq,  $J = 10.8, 7.2$  Hz, 1H), 3.87 (dq,  $J = 10.8, 7.2$  Hz, 1H), 3.65 (s, 3H), 1.25–1.22 (m, 1H), 1.02–0.98 (m, 1H), 0.88 (t,  $J = 7.2$  Hz, 3H), 0.83–0.81 (m, 2H);

$^{13}\text{C NMR}$  (100 MHz,  $\text{CDCl}_3$ ):  $\delta$  172.8, 152.2, 147.1, 146.7, 142.2, 140.5, 131.8, 131.2, 127.9, 127.3, 123.4, 116.6, 114.0, 110.6, 107.1, 101.0, 69.9, 61.0, 55.7, 36.8, 13.7, 10.8, 10.4;

**HRMS (ESI)**:  $[\text{M}+\text{H}]^+$  Calcd for  $\text{C}_{27}\text{H}_{28}\text{NO}_5^+$ : 446.1962; found: 446.1960;

**HPLC** (Chiralpak IBN): *n*-Hexane/*i*-PrOH = 99/1, flow rate 1.0 mL/min,  $T = 30$  °C,  $\lambda = 254$  nm,  $t_{R1} = 13.369$  min (major),  $t_{R2} = 19.766$  min (minor); 99% ee;  $[\alpha]_D^{33.5} = 63.75$  ( $c = 0.11, \text{CH}_2\text{Cl}_2$ ).

<Chromatogram>

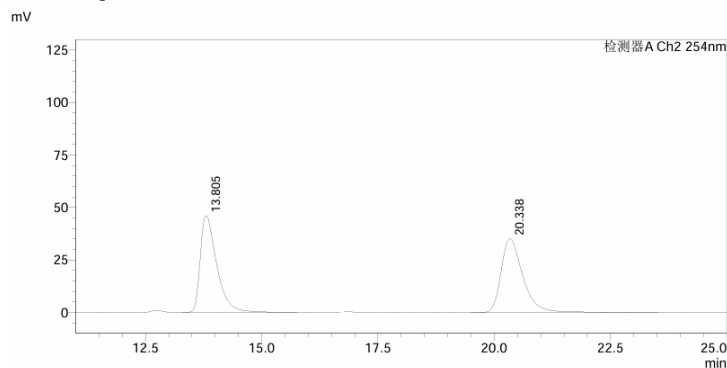

<Peak Table>

| 检测器A Ch2 254nm |           |         |        |        |      |      |
|----------------|-----------|---------|--------|--------|------|------|
| Peak#          | Ret. Time | Area    | Height | Conc.  | Unit | Mark |
| 1              | 13.805    | 1132855 | 46075  | 49.968 |      | M    |
| 2              | 20.338    | 1134295 | 35098  | 50.032 |      | M    |
| 总计             |           | 2267150 | 81173  |        |      |      |

<Chromatogram>

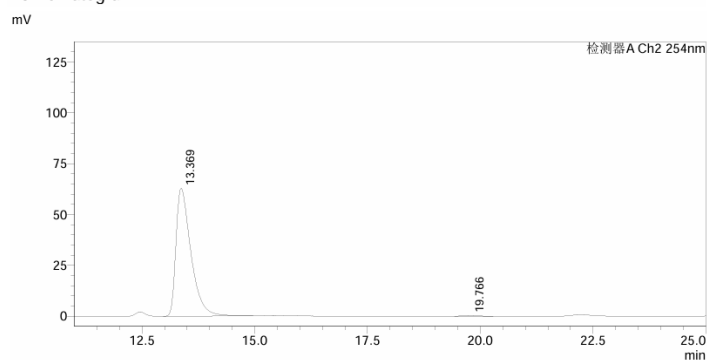

<Peak Table>

| 检测器A Ch2 254nm |           |         |        |        |      |      |
|----------------|-----------|---------|--------|--------|------|------|
| Peak#          | Ret. Time | Area    | Height | Conc.  | Unit | Mark |
| 1              | 13.369    | 1452311 | 62865  | 99.557 |      | M    |
| 2              | 19.766    | 6469    | 261    | 0.443  |      | M    |
| 总计             |           | 1458780 | 63126  |        |      |      |

### Ethyl (R)-2-(3,4-dichlorophenyl)-2-((4-methoxyphenyl)amino)-2-(1-phenylcyclopropyl)acetate (**3e**)

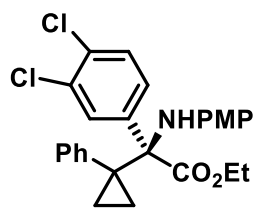

General procedure B was followed using **2a** as an electrophile on 0.1 mmol scale. The reaction mixture was purified by flash column chromatography (silica gel, PE/EtOAc = 20/1) to afford **3e** as a colorless oil (29.3 mg, 62%);  $R_f = 0.49$  (PE/EtOAc = 10/1);

$^1\text{H NMR}$  (400 MHz,  $\text{CDCl}_3$ ):  $\delta$  7.93 (d,  $J = 2.4$  Hz, 1H), 7.51 (dd,  $J = 8.4, 2.0$  Hz, 1H), 7.25 (d,  $J = 8.4$  Hz, 1H), 7.21–7.15 (m, 3H), 7.08–7.05 (m, 2H), 6.57 (d,  $J = 9.2$  Hz, 2H), 6.20 (d,  $J = 9.2$  Hz, 2H), 4.53 (bs, 1H), 4.02 (dq,  $J = 10.4, 7.2$  Hz, 1H), 3.91 (dq,  $J = 10.8, 7.2$  Hz, 1H), 3.66 (s, 3H), 1.30–1.26 (m, 1H), 1.07–1.02 (m, 1H), 0.90 (t,  $J = 7.2$  Hz, 3H), 0.93–0.83 (m, 2H);

$^{13}\text{C NMR}$  (100 MHz,  $\text{CDCl}_3$ ):  $\delta$  172.1, 152.6, 141.4, 139.7, 138.5, 131.9, 131.8, 131.5, 131.4, 129.3, 129.2, 127.9, 127.6, 116.5, 114.2, 69.6, 61.4, 55.7, 35.9, 13.8, 11.2, 10.4;

**HRMS (ESI)**:  $[\text{M}+\text{H}]^+$  Calcd for  $\text{C}_{26}\text{H}_{26}\text{Cl}_2\text{NO}_3^+$ : 470.1284; found: 470.1284;

**HPLC** (Chiralpak AD-H): *n*-Hexane/*i*-PrOH = 99/1, flow rate 1.0 mL/min,  $T = 30$  °C,  $\lambda = 254$  nm,  $t_{R1} = 10.735$  min (minor),  $t_{R2} = 13.475$  min (major); 99% ee;  $[\alpha]_D^{33.5} = 276.67$  ( $c = 0.06, \text{CH}_2\text{Cl}_2$ ).

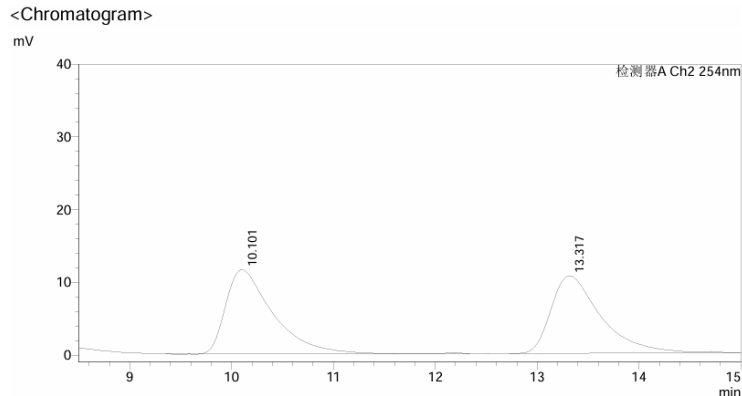

<Peak Table>

| Peak# | Ret. Time | Area   | Height | Conc.  | Unit | Mark |
|-------|-----------|--------|--------|--------|------|------|
| 1     | 10.101    | 370519 | 11563  | 50.508 |      | M    |
| 2     | 13.317    | 363071 | 10642  | 49.492 |      | M    |
| 总计    |           | 733589 | 22205  |        |      |      |

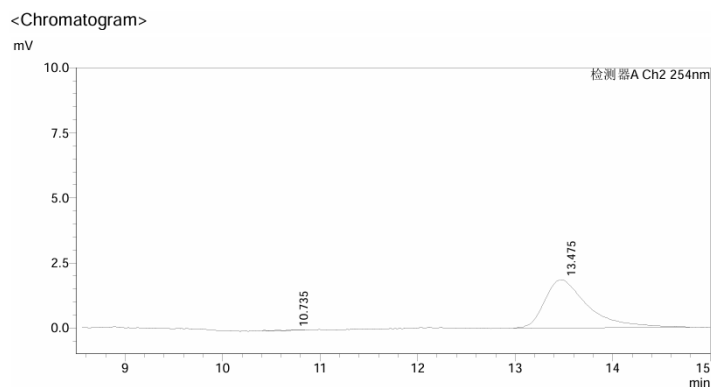

<Peak Table>

| Peak# | Ret. Time | Area  | Height | Conc.  | Unit | Mark |
|-------|-----------|-------|--------|--------|------|------|
| 1     | 10.735    | 8     | 16     | 0.013  |      | M    |
| 2     | 13.475    | 57635 | 1861   | 99.987 |      | M    |
| 总计    |           | 57643 | 1877   |        |      |      |

**Ethyl (S)-2-(2-fluoro-4-methoxyphenyl)-2-((4-methoxyphenyl)amino)-2-(1-phenylcyclopropyl)acetate (3f)**

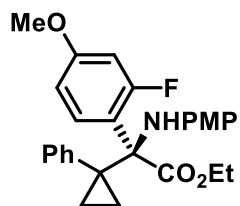

General procedure B was followed using **2a** as an electrophile on 0.1 mmol scale. The reaction mixture was purified by flash column chromatography (silica gel, PE/EtOAc = 20/1) to afford **3f** as a colorless oil (30.5 mg, 68%);  $R_f = 0.50$  (PE/EtOAc = 10/1);

$^1\text{H NMR}$  (400 MHz,  $\text{CDCl}_3$ ):  $\delta$  7.23–7.20 (m, 2H), 7.11 (t,  $J = 8.8$  Hz, 1H), 7.06–7.04 (m, 3H), 6.61 (d,  $J = 8.8$  Hz, 2H), 6.55 (dd,  $J = 13.2, 2.4$  Hz, 1H), 6.44 (d,  $J = 9.2$  Hz, 2H), 6.33 (dd,  $J = 8.8, 2.4$  Hz, 1H), 4.66 (bs, 1H), 3.96 (q,  $J = 7.2$  Hz, 2H), 3.73 (s, 3H), 3.68 (s, 3H), 1.78–1.73 (m, 1H), 1.32–1.26 (m, 1H), 1.18–1.13 (m, 1H), 0.97 (t,  $J = 6.8$  Hz, 3H), 0.88–0.83 (m, 1H);

$^{13}\text{C NMR}$  (100 MHz,  $\text{CDCl}_3$ ):  $\delta$  170.4, 161.5 (d,  $J_{\text{C-F}} = 246.5$  Hz), 160.4 (d,  $J_{\text{C-F}} = 11.5$  Hz), 152.9, 143.2, 140.2, 131.28 (d,  $J_{\text{C-F}} = 7.8$  Hz), 131.25, 127.4, 126.7, 118.6 (d,  $J_{\text{C-F}} = 12.7$  Hz), 117.3, 114.1, 108.2 (d,  $J_{\text{C-F}} = 2.5$  Hz), 102.0 (d,  $J_{\text{C-F}} = 27.6$  Hz), 71.1 (d,  $J_{\text{C-F}} = 4.2$  Hz), 61.3, 55.7, 55.6, 34.5, 13.9, 13.5 (d,  $J_{\text{C-F}} = 6.5$  Hz), 10.3;

$^{19}\text{F}$  NMR (376 MHz,  $\text{CDCl}_3$ )  $\delta$  -100.6;

HRMS (ESI):  $[\text{M}+\text{H}]^+$  Calcd for  $\text{C}_{27}\text{H}_{29}\text{FNO}_4^+$ : 450.2075; found: 450.2074;

HPLC (Chiralpak IA): *n*-Hexane/*i*-PrOH = 99/1, flow rate 1.0 mL/min,  $T = 30\text{ }^\circ\text{C}$ ,  $\lambda = 245\text{ nm}$ ,  $t_{\text{R}1} = 16.045\text{ min}$  (minor),  $t_{\text{R}2} = 17.726\text{ min}$  (major); 98% ee;  $[\alpha]_{\text{D}}^{33.5} = 25.11$  ( $c = 0.31$ ,  $\text{CH}_2\text{Cl}_2$ ).

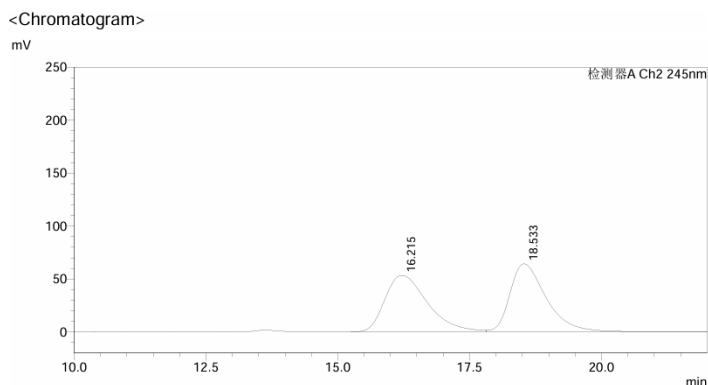

<Peak Table>

| Peak# | Ret. Time | Area    | Height | Conc.  | Unit | Mark |
|-------|-----------|---------|--------|--------|------|------|
| 1     | 16.215    | 2996379 | 53384  | 49.336 |      |      |
| 2     | 18.533    | 3077058 | 64224  | 50.664 |      | SV   |
| 总计    |           | 6073436 | 117608 |        |      |      |

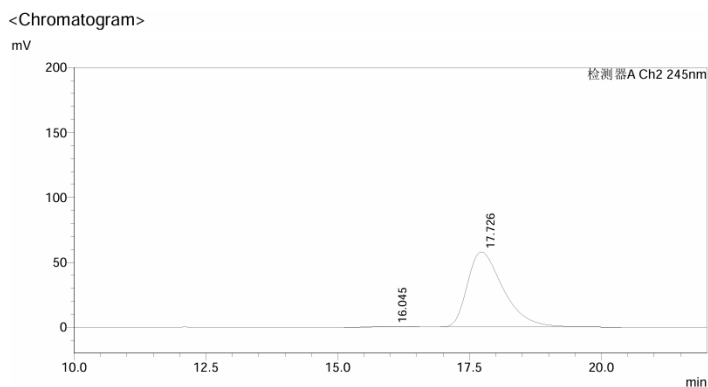

<Peak Table>

| Peak# | Ret. Time | Area    | Height | Conc.  | Unit | Mark |
|-------|-----------|---------|--------|--------|------|------|
| 1     | 16.045    | 22980   | 516    | 0.830  |      | M    |
| 2     | 17.726    | 2745322 | 57815  | 99.170 |      | M    |
| 总计    |           | 2768302 | 58331  |        |      |      |

Isopropyl  
yl)acetate (**3g**)

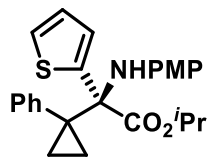

(*R*)-2-((4-methoxyphenyl)amino)-2-(1-phenylcyclopropyl)-2-(thiophen-2-

yl)acetate (**3g**)  
General procedure B was followed using **2a** as an electrophile on 0.2 mmol scale. The reaction mixture was purified by flash column chromatography (silica gel, PE/EtOAc = 20/1) to afford **3g** as a white solid (46.0 mg, 55%);  $R_f = 0.54$  (PE/EtOAc = 10/1);

$^1\text{H}$  NMR (400 MHz,  $\text{CDCl}_3$ ):  $\delta$  7.26–7.19 (m, 6H), 7.14 (dd,  $J = 4.0, 1.6$  Hz, 1H), 6.88 (dd,  $J = 5.2, 3.6$  Hz, 1H), 6.56 (d,  $J = 8.8$  Hz, 2H), 6.26 (d,  $J = 9.2$  Hz, 2H), 4.86 (sept,  $J = 6.4$  Hz, 1H), 4.64 (bs, 1H), 3.65 (s, 3H), 1.31–1.26 (m, 1H), 1.13–1.08 (m, 1H), 1.01 (d,  $J = 6.4$  Hz, 3H), 0.82 (d,  $J = 6.4$  Hz, 3H), 0.90–0.76 (m, 5H);

$^{13}\text{C}$  NMR (100 MHz,  $\text{CDCl}_3$ ):  $\delta$  171.9, 152.5, 142.0, 141.8, 140.2, 131.9, 128.4, 128.0, 127.6, 126.3, 126.0, 116.6, 114.0, 69.6, 69.1, 55.7, 35.8, 21.6, 21.2, 11.1, 11.0;

HRMS (ESI):  $[\text{M}+\text{H}]^+$  Calcd for  $\text{C}_{25}\text{H}_{28}\text{NO}_3\text{S}^+$ : 422.1784; found: 422.1781;



**HPLC** (Chiralpak IBN): *n*-Hexane/*i*-PrOH = 99/1, flow rate 1.0 mL/min, T = 30 °C,  $\lambda$  = 254 nm,  $t_{R1}$  = 8.486 min (minor),  $t_{R2}$  = 9.004 min (major); 99% ee;  $[\alpha]_D^{33.5}$  = 47.78 (c = 0.12, CH<sub>2</sub>Cl<sub>2</sub>).

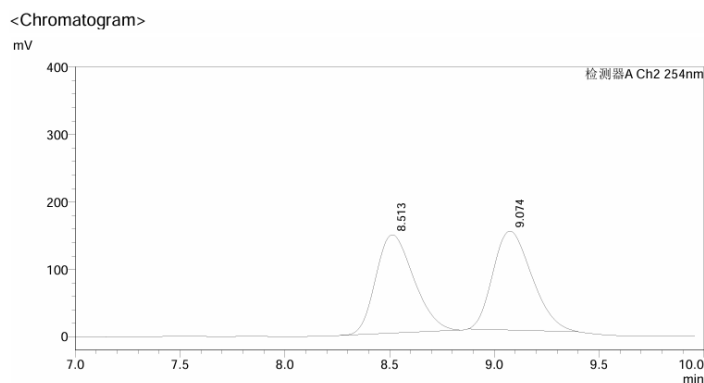

<Peak Table>

| 检测器A Ch2 254nm |           |         |        |        |      |      |
|----------------|-----------|---------|--------|--------|------|------|
| Peak#          | Ret. Time | Area    | Height | Conc.  | Unit | Mark |
| 1              | 8.513     | 1834792 | 145668 | 49.209 |      | M    |
| 2              | 9.074     | 1893757 | 146749 | 50.791 |      | M    |
| 总计             |           | 3728549 | 292416 |        |      |      |

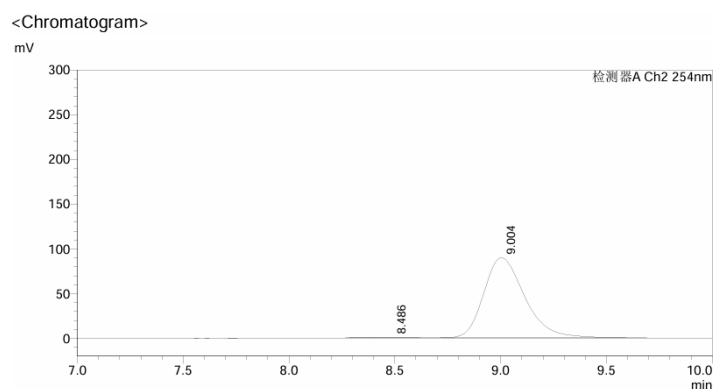

<Peak Table>

| 检测器A Ch2 254nm |           |         |        |        |      |      |
|----------------|-----------|---------|--------|--------|------|------|
| Peak#          | Ret. Time | Area    | Height | Conc.  | Unit | Mark |
| 1              | 8.486     | 5270    | 483    | 0.438  |      | M    |
| 2              | 9.004     | 1198976 | 89480  | 99.562 |      | M    |
| 总计             |           | 1204245 | 89963  |        |      |      |

### Isopropyl (R)-2-(benzo[d][1,3]dioxol-5-ylamino)-2-phenyl-2-(1-phenylcyclopropyl)acetate (3h)

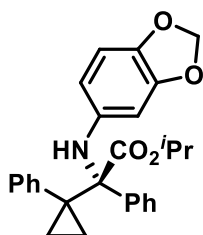

General procedure B was followed using **2a** as an electrophile on 0.2 mmol scale. The reaction mixture was purified by flash column chromatography (silica gel, PE/EtOAc = 20/1) to afford **3h** as a white solid (77.9 mg, 91%);  $R_f$  = 0.53 (PE/EtOAc = 10/1);

<sup>1</sup>H NMR (400 MHz, CDCl<sub>3</sub>):  $\delta$  7.73–7.71 (m, 2H), 7.22–7.16 (m, 3H), 7.13–7.07 (m, 5H), 6.39 (d,  $J$  = 8.4 Hz, 1H), 5.91 (d,  $J$  = 2.4 Hz, 1H), 5.71 (s, 2H), 5.66 (dd,  $J$  = 8.4, 2.8 Hz, 1H), 4.85 (sept,  $J$  = 6.4 Hz, 1H), 4.59 (bs, 1H), 1.29–1.25 (m, 1H), 1.03–1.00 (m, 4H), 0.82–0.78 (m, 5H);

<sup>13</sup>C NMR (100 MHz, CDCl<sub>3</sub>):  $\delta$  171.8, 147.5, 142.3, 142.2, 139.7, 137.6, 131.9, 129.7, 127.7, 127.37, 127.35, 127.2, 107.9, 107.5, 100.5, 98.4, 70.3, 69.1, 35.9, 21.7, 21.3, 11.0, 10.5;

**HRMS (ESI):** [M+H]<sup>+</sup> Calcd for C<sub>27</sub>H<sub>28</sub>NO<sub>4</sub><sup>+</sup>: 430.2013; found: 430.2012;

**HPLC** (Chiralpak IA): *n*-Hexane/EtOH = 99/1, flow rate 1.0 mL/min, T = 30 °C,  $\lambda$  = 245 nm,  $t_{R1}$  = 5.940 min (minor),  $t_{R2}$  = 6.972 min (major); 98% ee;  $[\alpha]_D^{33.5}$  = 84.58 (c = 0.16, CH<sub>2</sub>Cl<sub>2</sub>).

<Chromatogram>

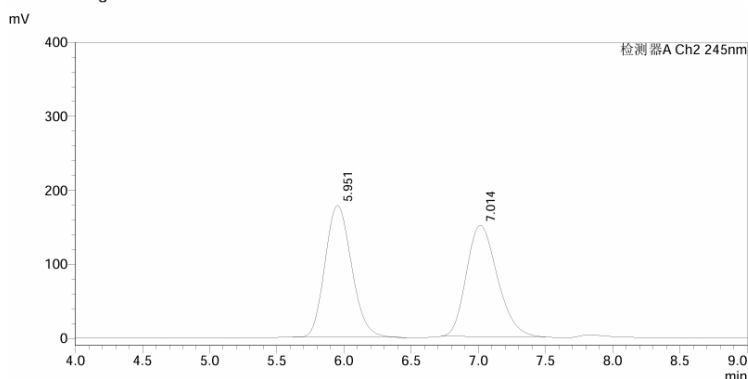

<Peak Table>

| 检测器A Ch2 245nm |           |         |        |        |      |      |
|----------------|-----------|---------|--------|--------|------|------|
| Peak#          | Ret. Time | Area    | Height | Conc.  | Unit | Mark |
| 1              | 5.951     | 2458032 | 178230 | 50.409 |      | M    |
| 2              | 7.014     | 2418143 | 150491 | 49.591 |      | M    |
| 总计             |           | 4876175 | 328722 |        |      |      |

<Chromatogram>

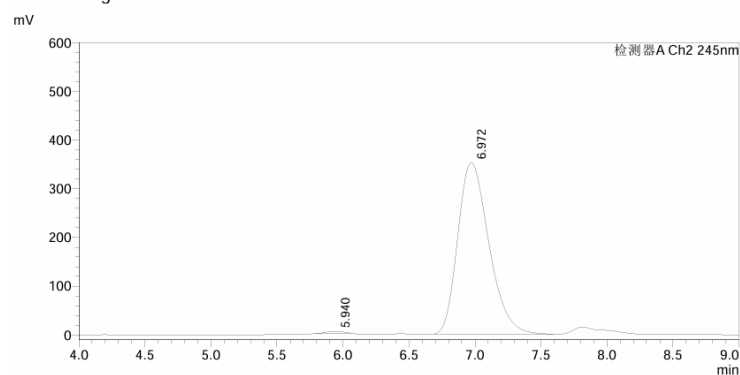

<Peak Table>

| 检测器A Ch2 245nm |           |         |        |        |      |      |
|----------------|-----------|---------|--------|--------|------|------|
| Peak#          | Ret. Time | Area    | Height | Conc.  | Unit | Mark |
| 1              | 5.940     | 38916   | 4163   | 0.670  |      | M    |
| 2              | 6.972     | 5768133 | 351608 | 99.330 |      | M    |
| 总计             |           | 5807049 | 355772 |        |      |      |

**Esopropyl (*R*)-2-((3-(benzyloxy)phenyl)amino)-2-phenyl-2-(1-phenylcyclopropyl)acetate (**3i**)**

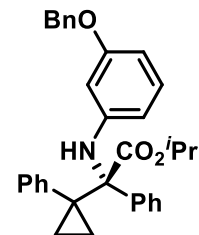

General procedure B was followed using **2a** as an electrophile on 0.2 mmol scale. The reaction mixture was purified by flash column chromatography (silica gel, PE/EtOAc = 20/1) to afford **3i** as a colorless oil (84.3 mg, 86%);  $R_f$  = 0.63 (PE/EtOAc = 10/1);

<sup>1</sup>H NMR (400 MHz, CDCl<sub>3</sub>):  $\delta$  7.70–7.68 (m, 2H), 7.25–7.20 (m, 5H), 7.18–7.13 (m, 3H), 7.08–7.02 (m, 5H), 6.74 (t,  $J$  = 8.0 Hz, 1H), 6.16 (dd,  $J$  = 8.4, 2.4 Hz, 1H), 5.85 (t,  $J$  = 2.4 Hz, 1H), 5.79 (dd,  $J$  = 8.0, 2.0 Hz, 1H), 4.75–4.68 (m, 4H), 1.22–1.19 (m, 1H), 0.96–0.93 (m, 1H), 0.90 (d,  $J$  = 6.4 Hz, 3H), 0.77–0.70 (m, 2H), 0.64 (d,  $J$  = 6.4 Hz, 3H);

<sup>13</sup>C NMR (100 MHz, CDCl<sub>3</sub>):  $\delta$  171.7, 159.2, 148.2, 142.1, 137.5, 137.4, 131.9, 129.7, 129.1, 128.5, 127.8, 127.8, 127.5, 127.40, 127.36, 127.2, 108.9, 104.5, 102.6, 70.0, 69.7, 69.1, 35.7, 21.6, 21.1, 10.9, 10.6;

**HRMS (ESI):** [M+H]<sup>+</sup> Calcd for C<sub>33</sub>H<sub>34</sub>NO<sub>3</sub><sup>+</sup>: 492.2533; found: 492.2533;

**HPLC (Chiralpak AD-H):** *n*-Hexane/*i*-PrOH = 99/1, flow rate 1.0 mL/min, T = 30 °C,  $\lambda$  = 254 nm,  $t_{R1}$  = 17.652 min (major),  $t_{R2}$  = 27.416 min (minor); 98% ee;  $[\alpha]_D^{33.5}$  = 313.04 (c = 0.15, CH<sub>2</sub>Cl<sub>2</sub>).

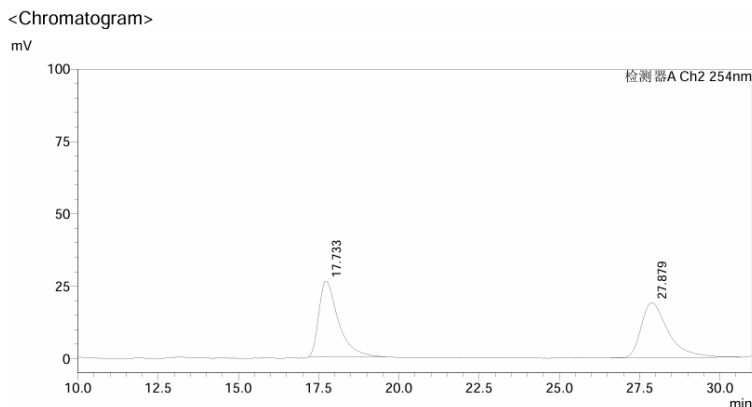

<Peak Table>

| Peak# | Ret. Time | Area    | Height | Conc.  | Unit | Mark |
|-------|-----------|---------|--------|--------|------|------|
| 1     | 17.733    | 1117297 | 26253  | 49.910 |      | M    |
| 2     | 27.879    | 1121343 | 19057  | 50.090 |      | M    |
| 总计    |           | 2238641 | 45310  |        |      |      |

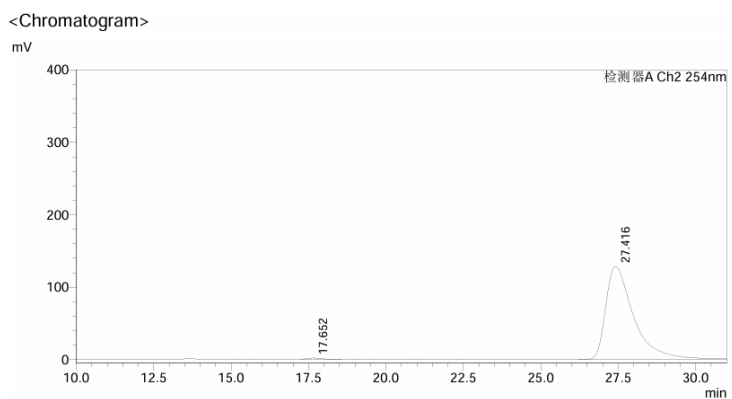

<Peak Table>

| Peak# | Ret. Time | Area    | Height | Conc.  | Unit | Mark |
|-------|-----------|---------|--------|--------|------|------|
| 1     | 17.652    | 74152   | 2030   | 0.883  |      | M    |
| 2     | 27.416    | 8320095 | 128604 | 99.117 |      | M    |
| 总计    |           | 8394247 | 130634 |        |      |      |

### Methyl (*R*)-2-((4-methoxyphenyl)amino)-2-(1-phenylcyclopropyl)propanoate (**3j**)

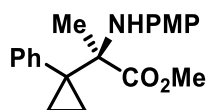

General procedure B was followed using **2a** as an electrophile on 0.2 mmol scale. The reaction mixture was purified by flash column chromatography (silica gel, PE/EtOAc = 20/1) to afford **3j** as a white solid (31.2 mg, 46%);  $R_f$  = 0.67 (PE/EtOAc = 10/1);

<sup>1</sup>H NMR (400 MHz, CDCl<sub>3</sub>):  $\delta$  7.37–7.34 (m, 2H), 7.29–7.21 (m, 3H), 6.74–6.69 (m, 4H), 3.94 (bs, 1H), 3.74 (s, 3H), 3.61 (s, 3H), 1.32 (s, 3H), 1.29–1.26 (m, 1H), 1.21–1.18 (m, 1H), 0.88–0.80 (m, 2H);

<sup>13</sup>C NMR (100 MHz, CDCl<sub>3</sub>):  $\delta$  175.8, 154.7, 142.8, 138.6, 131.9, 127.9, 127.2, 122.8, 114.2, 64.8, 55.6, 52.0, 33.9, 20.0, 10.2, 9.9;

**HRMS (ESI):** [M+H]<sup>+</sup> Calcd for C<sub>20</sub>H<sub>24</sub>NO<sub>3</sub><sup>+</sup>: 326.1751; found: 326.1751;

**HPLC (Chiralpak IBN):** *n*-Hexane/EtOH = 99/1, flow rate 1.0 mL/min, T = 30 °C,  $\lambda$  = 220 nm,  $t_{R1}$  = 8.638 min (minor),  $t_{R2}$  = 12.947 min (major); 99% ee;  $[\alpha]_D^{33.5}$  = -37.62 (c = 0.14, CH<sub>2</sub>Cl<sub>2</sub>).

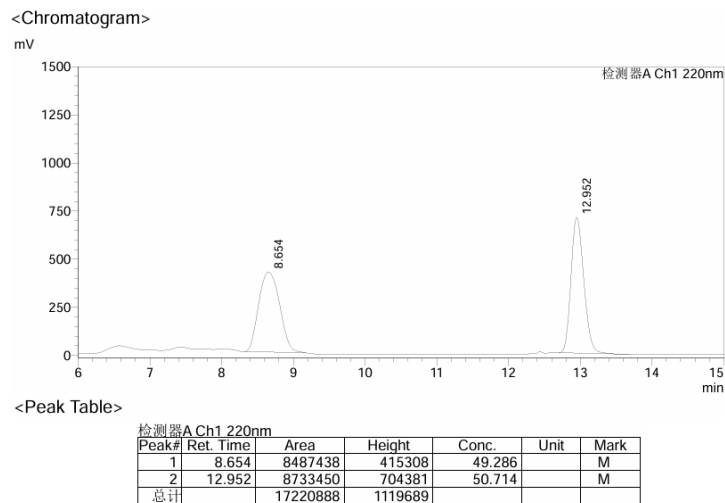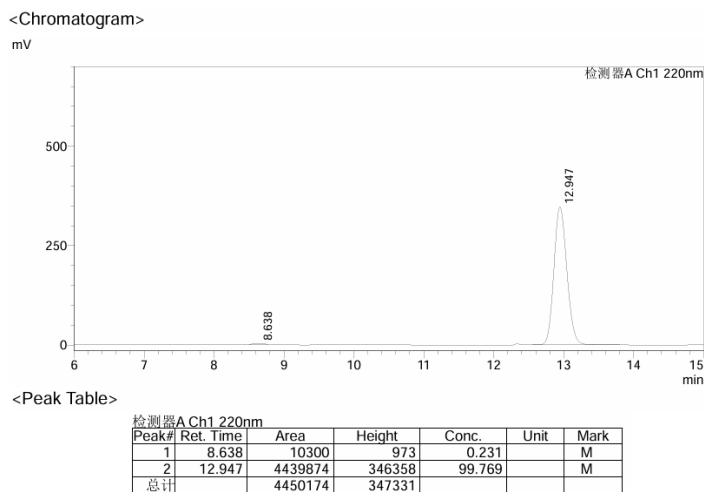

### Isopropyl (*R*)-2-((4-methoxyphenyl)amino)-2-phenyl-2-(1-phenylcyclopropyl)acetate (**3k**)

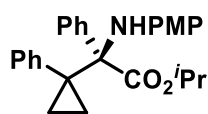

General procedure B was followed using **2a** as an electrophile on 0.2 mmol scale. The reaction mixture was purified by flash column chromatography (silica gel, PE/EtOAc = 20/1~10/1) to afford **3k** as a white solid (74.8 mg, 90%);  $R_f$  = 0.70 (PE/EtOAc = 10/1);

$^1\text{H NMR}$  (400 MHz,  $\text{CDCl}_3$ ):  $\delta$  7.78–7.76 (m, 2H), 7.24–7.20 (m, 3H), 7.18–7.11 (m, 5H), 6.56 (d,  $J$  = 9.2 Hz, 2H), 6.25 (d,  $J$  = 8.8 Hz, 2H), 4.86 (sept,  $J$  = 6.4 Hz, 1H), 4.59 (bs, 1H), 3.65 (s, 3H), 1.35–1.32 (m, 1H), 1.11–1.06 (m, 1H), 1.04 (d,  $J$  = 6.0 Hz, 3H), 0.87–0.82 (m, 2H), 0.77 (d,  $J$  = 6.4 Hz, 3H);

$^{13}\text{C NMR}$  (100 MHz,  $\text{CDCl}_3$ ):  $\delta$  172.0, 152.2, 142.3, 140.8, 137.9, 131.9, 129.7, 127.7, 127.32, 127.25, 127.1, 116.6, 114.0, 70.2, 69.0, 55.7, 35.9, 21.6, 21.2, 11.1, 10.4;

**HRMS (ESI)**:  $[\text{M}+\text{H}]^+$  Calcd for  $\text{C}_{27}\text{H}_{30}\text{NO}_3^+$ : 416.2220; found: 416.2220;

**HPLC** (Chiralpak IA): *n*-Hexane/*i*-PrOH = 99/1, flow rate 1.0 mL/min,  $T$  = 30 °C,  $\lambda$  = 245 nm,  $t_{R1}$  = 5.622 min (minor),  $t_{R2}$  = 7.057 min (major); 99% ee;  $[\alpha]_D^{33.5}$  = 62.25 ( $c$  = 0.27,  $\text{CH}_2\text{Cl}_2$ ).

<Chromatogram>

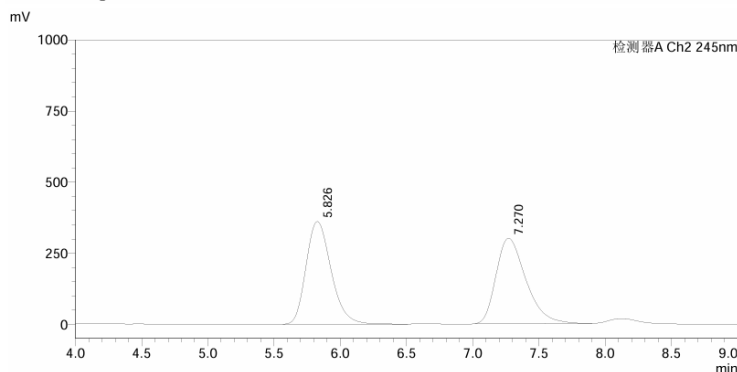

<Peak Table>

| 检测器A Ch2 245nm |           |         |        |        |      |      |
|----------------|-----------|---------|--------|--------|------|------|
| Peak#          | Ret. Time | Area    | Height | Conc.  | Unit | Mark |
| 1              | 5.826     | 4726003 | 360502 | 50.133 |      | M    |
| 2              | 7.270     | 4700895 | 300028 | 49.867 |      | M    |
| 总计             |           | 9426899 | 660531 |        |      |      |

<Chromatogram>

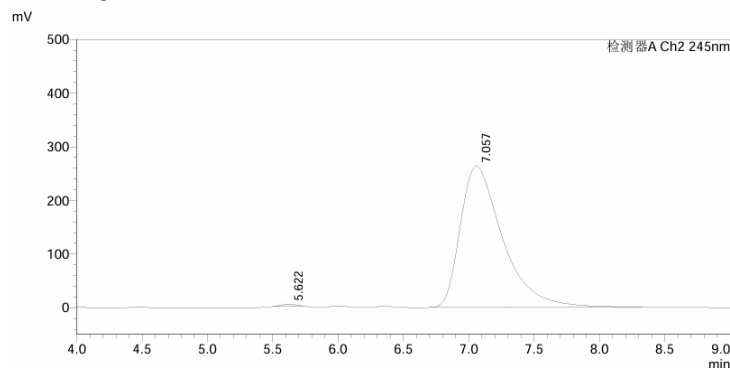

<Peak Table>

| 检测器A Ch2 245nm |           |         |        |        |      |      |
|----------------|-----------|---------|--------|--------|------|------|
| Peak#          | Ret. Time | Area    | Height | Conc.  | Unit | Mark |
| 1              | 5.622     | 29588   | 3486   | 0.496  |      | M    |
| 2              | 7.057     | 5931068 | 262761 | 99.504 |      | M    |
| 总计             |           | 5960656 | 266247 |        |      |      |

### Isopropyl (R)-2-(1-(4-(tert-butyl)phenyl)cyclopropyl)-2-((4-methoxyphenyl)amino)-2-phenylacetate (31)

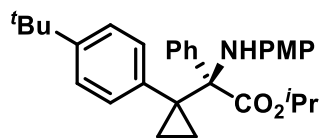

General procedure B was followed using **2b** as an electrophile on 0.1 mmol scale. The reaction mixture was purified by flash column chromatography (silica gel, PE/EtOAc = 20/1) to afford **31** as a white solid (40.2 mg, 85%);  $R_f = 0.67$  (PE/EtOAc = 10/1);

$^1\text{H NMR}$  (400 MHz,  $\text{CDCl}_3$ ):  $\delta$  7.81–7.78 (m, 2H), 7.23–7.21 (m, 3H), 7.18 (d,  $J = 8.4$  Hz, 2H), 7.08 (d,  $J = 8.4$  Hz, 2H), 6.54 (d,  $J = 9.2$  Hz, 2H), 6.20 (d,  $J = 8.8$  Hz, 2H), 4.80 (sept,  $J = 6.4$  Hz, 1H), 4.61 (bs, 1H), 3.64 (s, 3H), 1.27 (s, 9H), 1.21–1.18 (m, 1H), 0.97–0.94 (m, 1H), 0.93 (d,  $J = 6.4$  Hz, 3H), 0.80–0.77 (m, 2H), 0.75 (d,  $J = 6.4$  Hz, 3H);

$^{13}\text{C NMR}$  (100 MHz,  $\text{CDCl}_3$ ):  $\delta$  172.2, 152.1, 150.1, 140.9, 139.2, 137.6, 131.4, 129.8, 127.34, 127.27, 124.7, 116.6, 113.9, 70.2, 68.8, 55.8, 35.2, 34.5, 31.4, 21.6, 21.2, 10.6, 10.5;

**HRMS (ESI)**:  $[\text{M}+\text{H}]^+$  Calcd for  $\text{C}_{31}\text{H}_{38}\text{NO}_3^+$ : 472.2846; found: 472.2846;

**HPLC** (Chiralpak IA): *n*-Hexane/*i*-PrOH = 99/1, flow rate 1.0 mL/min,  $T = 30$  °C,  $\lambda = 245$  nm,  $t_{R1} = 4.900$  min (minor),  $t_{R2} = 6.497$  min (major); 99% ee;  $[\alpha]_D^{33.5} = 118.00$  ( $c = 0.1$ ,  $\text{CH}_2\text{Cl}_2$ ).

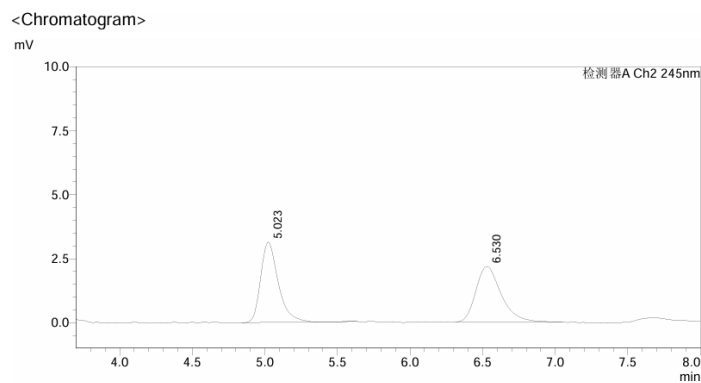

<Peak Table>

| Peak# | Ret. Time | Area  | Height | Conc.  | Unit | Mark |
|-------|-----------|-------|--------|--------|------|------|
| 1     | 5.023     | 26127 | 3134   | 49.914 |      | M    |
| 2     | 6.530     | 26217 | 2167   | 50.086 |      | M    |
| 总计    |           | 52343 | 5300   |        |      |      |

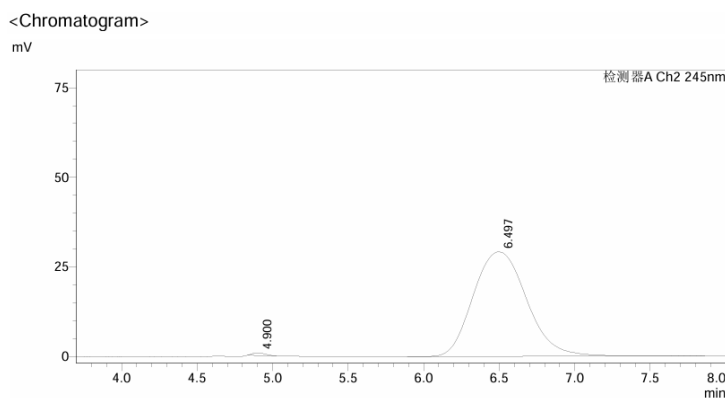

<Peak Table>

| Peak# | Ret. Time | Area   | Height | Conc.  | Unit | Mark |
|-------|-----------|--------|--------|--------|------|------|
| 1     | 4.900     | 4488   | 773    | 0.621  |      | M    |
| 2     | 6.497     | 717737 | 29176  | 99.379 |      | M    |
| 总计    |           | 722225 | 29948  |        |      |      |

**Isopropyl (R)-2-(1-([1,1'-biphenyl]-4-yl)cyclopropyl)-2-((4-methoxyphenyl)amino)-2-phenylacetate (3m)**

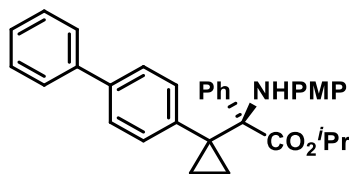

General procedure B was followed using **2c** as an electrophile on 0.2 mmol scale. The reaction mixture was purified by flash column chromatography (silica gel, PE/EtOAc = 20/1) to afford **3m** as a white solid (91.8 mg, 93%);  $R_f = 0.75$  (PE/EtOAc = 10/1);

$^1\text{H NMR}$  (400 MHz,  $\text{CDCl}_3$ ):  $\delta$  7.80–7.78 (m, 2H), 7.55 (d,  $J = 6.8$  Hz, 2H), 7.44–7.38 (m, 4H), 7.33 (t,  $J = 7.6$  Hz, 1H), 7.25–7.23 (m, 3H), 7.18 (d,  $J = 8.4$  Hz, 2H), 6.57 (d,  $J = 8.8$  Hz, 2H), 6.26 (d,  $J = 8.8$  Hz, 2H), 4.87 (sept,  $J = 6.4$  Hz, 1H), 4.61 (bs, 1H), 3.65 (s, 3H), 1.37–1.34 (m, 1H), 1.13–1.08 (m, 1H), 1.05 (d,  $J = 6.4$  Hz, 3H), 0.91–0.84 (m, 2H), 0.78 (d,  $J = 6.4$  Hz, 3H);

$^{13}\text{C NMR}$  (100 MHz,  $\text{CDCl}_3$ ):  $\delta$  172.1, 152.3, 141.4, 140.80, 140.79, 139.9, 137.9, 132.3, 129.8, 128.9, 127.4, 127.3, 127.1, 126.4, 116.7, 114.0, 70.2, 69.1, 55.7, 35.6, 21.7, 21.2, 11.1, 10.6;

**HRMS (ESI)**:  $[\text{M}+\text{H}]^+$  Calcd for  $\text{C}_{33}\text{H}_{34}\text{NO}_3^+$ : 492.2533; found: 492.2533;

**HPLC** (Chiralpak IBN): *n*-Hexane/*i*-PrOH = 99/1, flow rate 1.0 mL/min,  $T = 30$  °C,  $\lambda = 254$  nm,  $t_{R1} = 10.233$  min (minor),  $t_{R2} = 11.995$  min (major); 99% ee;  $[\alpha]_D^{33.5} = 111.82$  ( $c = 0.37$ ,  $\text{CH}_2\text{Cl}_2$ ).

<Chromatogram>

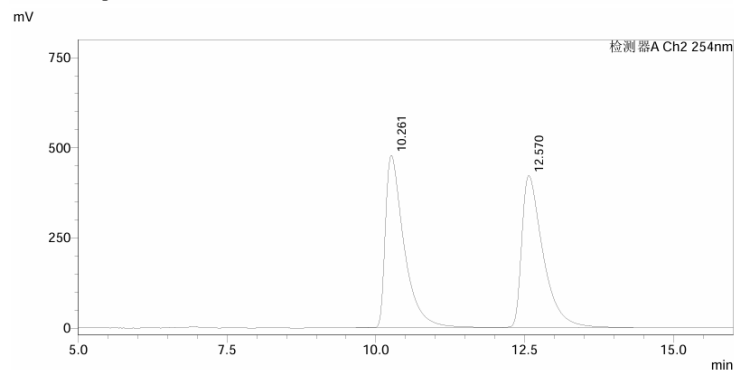

<Peak Table>

| Peak# | Ret. Time | Area     | Height | Conc.  | Unit | Mark |
|-------|-----------|----------|--------|--------|------|------|
| 1     | 10.261    | 10423469 | 478304 | 50.037 |      | M    |
| 2     | 12.570    | 10408213 | 420586 | 49.963 |      | M    |
| 总计    |           | 20831682 | 898890 |        |      |      |

<Chromatogram>

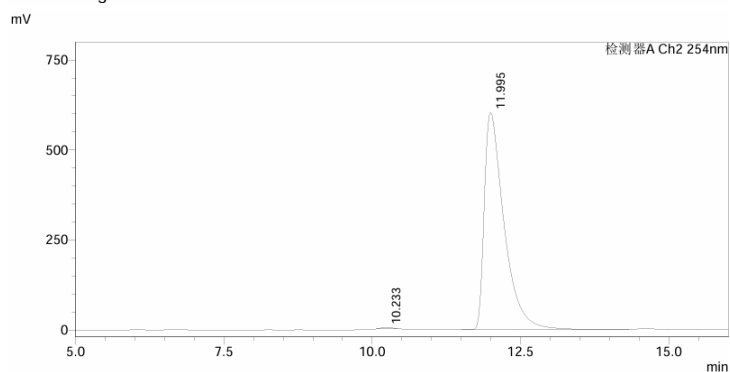

<Peak Table>

| Peak# | Ret. Time | Area     | Height | Conc.  | Unit | Mark |
|-------|-----------|----------|--------|--------|------|------|
| 1     | 10.233    | 42840    | 3246   | 0.304  |      | M    |
| 2     | 11.995    | 14050330 | 603929 | 99.696 |      | M    |
| 总计    |           | 14093171 | 607175 |        |      |      |

### Isopropyl phenylacetate (3n)

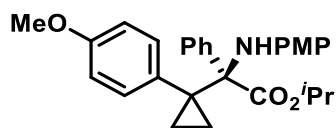

### (R)-2-((4-methoxyphenyl)amino)-2-(1-(4-methoxyphenyl)cyclopropyl)-2-phenylacetate (3n)

General procedure B was followed using **2d** as an electrophile on 0.1 mmol scale. The reaction mixture was purified by flash column chromatography (silica gel, PE/EtOAc = 20/1~10/1) to afford **3n** as a white solid (38.8 mg, 87%);  $R_f = 0.56$  (PE/EtOAc = 10/1);

$^1\text{H NMR}$  (400 MHz,  $\text{CDCl}_3$ ):  $\delta$  7.74–7.72 (m, 2H), 7.23–7.21 (m, 3H), 7.00 (d,  $J = 8.8$  Hz, 2H), 6.67 (d,  $J = 8.8$  Hz, 2H), 6.54 (d,  $J = 9.2$  Hz, 2H), 6.22 (d,  $J = 8.8$  Hz, 2H), 4.85 (sept,  $J = 6.4$  Hz, 1H), 4.51 (bs, 1H), 3.75 (s, 3H), 3.64 (s, 3H), 1.30–1.26 (m, 1H), 1.10–1.03 (m, 4H), 0.81–0.74 (m, 5H);

$^{13}\text{C NMR}$  (100 MHz,  $\text{CDCl}_3$ ):  $\delta$  172.2, 158.6, 152.2, 140.9, 138.0, 134.3, 132.9, 129.7, 127.3, 127.2, 116.6, 114.0, 113.0, 70.2, 69.0, 55.7, 55.3, 35.1, 21.7, 21.2, 11.3, 10.6;

**HRMS (ESI)**:  $[\text{M}+\text{H}]^+$  Calcd for  $\text{C}_{28}\text{H}_{32}\text{NO}_4^+$ : 446.2326; found: 446.2326;

**HPLC** (Chiralpak IA):  $n$ -Hexane/ $i$ -PrOH = 99/1, flow rate 1.0 mL/min,  $T = 30$  °C,  $\lambda = 245$  nm,  $t_{R1} = 8.666$  min (minor),  $t_{R2} = 11.702$  min (major); 99% ee;  $[\alpha]_D^{33.5} = 93.89$  ( $c = 0.12$ ,  $\text{CH}_2\text{Cl}_2$ ).

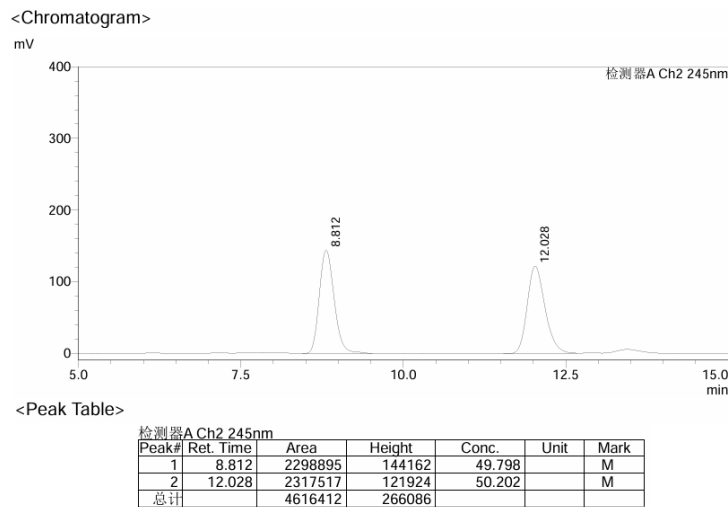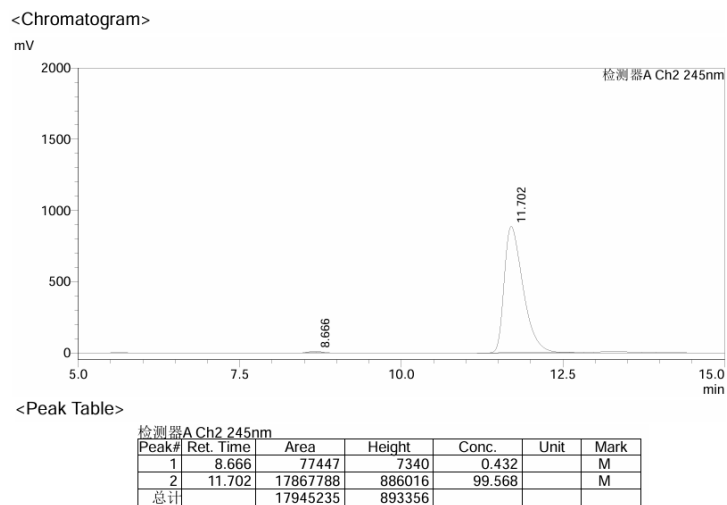

**Isopropyl (R)-2-(1-(4-(benzyloxy)phenyl)cyclopropyl)-2-((4-methoxyphenyl)amino)-2-phenylacetate (3o)**

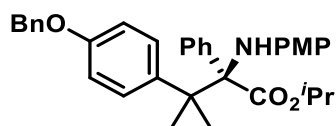

General procedure B was followed using **2e** as an electrophile on 0.1 mmol scale. The reaction mixture was purified by flash column chromatography (silica gel, PE/EtOAc = 20/1) to afford **3o** as a white solid (46.3 mg, 89%);  $R_f = 0.56$  (PE/EtOAc = 10/1);

$^1\text{H NMR}$  (400 MHz,  $\text{CDCl}_3$ ):  $\delta$  7.75–7.72 (m, 2H), 7.42–7.32 (m, 5H), 7.23–7.21 (m, 3H), 7.00 (d,  $J = 8.4$  Hz, 2H), 6.75 (d,  $J = 8.8$  Hz, 2H), 6.55 (d,  $J = 8.8$  Hz, 2H), 6.22 (d,  $J = 8.8$  Hz, 2H), 5.00 (s, 2H), 4.84 (sept,  $J = 6.4$  Hz, 1H), 4.52 (bs, 1H), 3.65 (s, 3H), 1.30–1.27 (m, 1H), 1.07–1.00 (m, 4H), 0.81–0.78 (m, 2H), 0.77 (d,  $J = 6.0$  Hz, 3H);

$^{13}\text{C NMR}$  (100 MHz,  $\text{CDCl}_3$ ):  $\delta$  172.1, 157.8, 152.2, 140.9, 138.0, 137.1, 134.6, 132.9, 129.7, 128.7, 128.1, 127.6, 127.4, 127.2, 116.7, 114.00, 113.98, 70.2, 70.1, 69.0, 55.7, 35.1, 21.7, 21.2, 11.3, 10.6;

**HRMS (ESI)**:  $[\text{M}+\text{H}]^+$  Calcd for  $\text{C}_{34}\text{H}_{36}\text{NO}_4^+$ : 522.2639; found: 522.2639;

**HPLC** (Chiralpak IA): *n*-Hexane/*i*-PrOH = 99/1, flow rate 1.0 mL/min,  $T = 40$  °C,  $\lambda = 245$  nm,  $t_{R1} = 12.837$  min (minor),  $t_{R2} = 18.753$  min (major); 99% ee;  $[\alpha]_D^{33.5} = 107.55$  ( $c = 0.33$ ,  $\text{CH}_2\text{Cl}_2$ ).



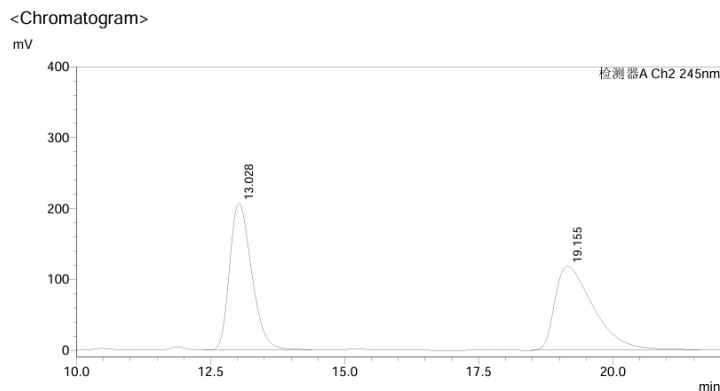

<Peak Table>

| Peak# | Ret. Time | Area     | Height | Conc.  | Unit | Mark |
|-------|-----------|----------|--------|--------|------|------|
| 1     | 13.028    | 5926637  | 206724 | 50.112 |      | M    |
| 2     | 19.155    | 5900203  | 118229 | 49.888 |      | M    |
| 总计    |           | 11826839 | 324954 |        |      |      |

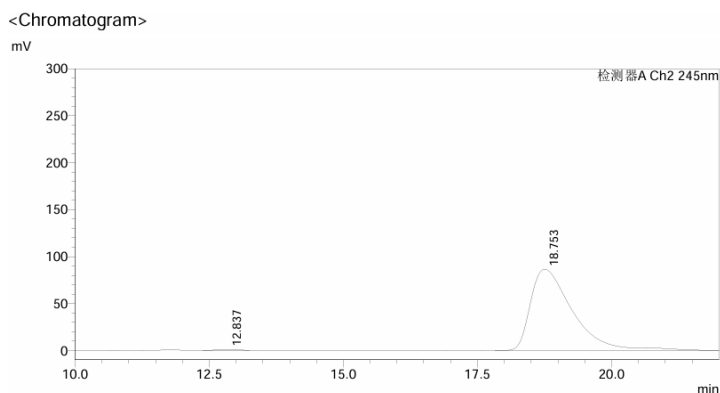

<Peak Table>

| Peak# | Ret. Time | Area    | Height | Conc.  | Unit | Mark |
|-------|-----------|---------|--------|--------|------|------|
| 1     | 12.837    | 30911   | 1164   | 0.647  |      | M    |
| 2     | 18.753    | 4743158 | 86549  | 99.353 |      | M    |
| 总计    |           | 4774069 | 87713  |        |      |      |

**Isopropyl phenylacetate (3p)**

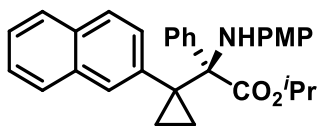

**(R)-2-((4-methoxyphenyl)amino)-2-(1-(naphthalen-2-yl)cyclopropyl)-2-phenylacetate (3p)**

General procedure B was followed using **2f** as an electrophile on 0.1 mmol scale. The reaction mixture was purified by flash column chromatography (silica gel, PE/EtOAc = 20/1) to afford **3p** as a white solid (41.3 mg, 89%);  $R_f = 0.67$  (PE/EtOAc = 10/1);

$^1\text{H NMR}$  (400 MHz,  $\text{CDCl}_3$ ):  $\delta$  7.81–7.74 (m, 3H), 7.72–7.70 (m, 1H), 7.63–7.60 (m, 2H), 7.47–7.42 (m, 2H), 7.24–7.19 (m, 4H), 6.55 (d,  $J = 9.2$  Hz, 2H), 6.24 (d,  $J = 8.8$  Hz, 2H), 4.88 (sept,  $J = 6.4$  Hz, 1H), 4.65 (bs, 1H), 3.64 (s, 3H), 1.43–1.40 (m, 1H), 1.15 (dt,  $J = 9.6, 2.8$  Hz, 1H), 0.99 (d,  $J = 6.4$  Hz, 3H), 0.94–0.92 (m, 2H), 0.77 (d,  $J = 6.4$  Hz, 3H);

$^{13}\text{C NMR}$  (100 MHz,  $\text{CDCl}_3$ ):  $\delta$  172.1, 152.2, 140.7, 139.8, 137.9, 132.9, 132.5, 131.1, 129.8, 129.7, 127.9, 127.6, 127.41, 127.35, 127.1, 126.0, 116.7, 114.0, 70.2, 69.1, 55.7, 35.9, 21.6, 21.2, 11.3, 10.6;

**HRMS (ESI)**:  $[\text{M}+\text{H}]^+$  Calcd for  $\text{C}_{31}\text{H}_{32}\text{NO}_3^+$ : 466.2377; found: 466.2377;

**HPLC** (Chiralpak IA): *n*-Hexane/*i*-PrOH = 99/1, flow rate 1.0 mL/min,  $T = 30$  °C,  $\lambda = 245$  nm,  $t_{R1} = 7.112$  min (minor),  $t_{R2} = 8.693$  min (major); 99% ee;  $[\alpha]_D^{33.5} = 82.35$  ( $c = 0.11, \text{CH}_2\text{Cl}_2$ ).

<Chromatogram>

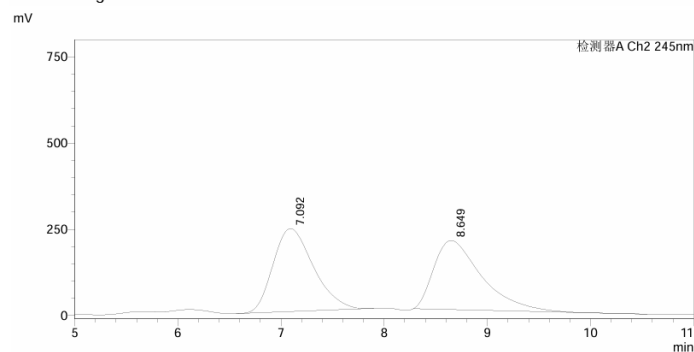

<Peak Table>

| 检测器A Ch2 245nm |           |          |        |        |      |      |
|----------------|-----------|----------|--------|--------|------|------|
| Peak#          | Ret. Time | Area     | Height | Conc.  | Unit | Mark |
| 1              | 7.092     | 6520981  | 240293 | 50.286 |      | M    |
| 2              | 8.649     | 6446830  | 200184 | 49.714 |      | M    |
| 总计             |           | 12967811 | 440476 |        |      |      |

<Chromatogram>

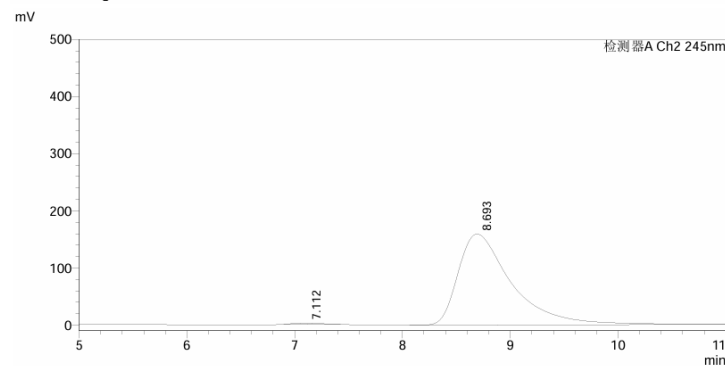

<Peak Table>

| 检测器A Ch2 245nm |           |         |        |        |      |      |
|----------------|-----------|---------|--------|--------|------|------|
| Peak#          | Ret. Time | Area    | Height | Conc.  | Unit | Mark |
| 1              | 7.112     | 35976   | 2008   | 0.648  |      | M    |
| 2              | 8.693     | 5512689 | 159080 | 99.352 |      | M    |
| 总计             |           | 5548664 | 161088 |        |      |      |

### Isopropyl phenylacetate (3q)

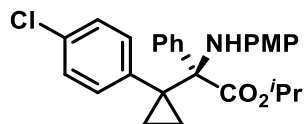

### (R)-2-(1-(4-chlorophenyl)cyclopropyl)-2-((4-methoxyphenyl)amino)-2-

phenylacetate (**3q**)

General procedure B was followed using **2g** as an electrophile on 0.1 mmol scale. The reaction mixture was purified by flash column chromatography (silica gel, PE/EtOAc = 20/1) to afford **3q** as a white solid (36.0 mg, 80%);  $R_f = 0.65$  (PE/EtOAc = 10/1);

$^1\text{H NMR}$  (400 MHz,  $\text{CDCl}_3$ ):  $\delta$  7.68–7.66 (m, 2H), 7.22–7.18 (m, 3H), 7.07 (d,  $J = 8.4$  Hz, 2H), 6.95 (d,  $J = 8.8$  Hz, 2H), 6.56 (d,  $J = 9.2$  Hz, 2H), 6.26 (d,  $J = 8.8$  Hz, 2H), 4.85 (sept,  $J = 6.4$  Hz, 1H), 4.45 (bs, 1H), 3.65 (s, 3H), 1.42–1.38 (m, 1H), 1.67–1.12 (m, 1H), 1.08 (d,  $J = 6.0$  Hz, 3H), 0.86–0.79 (m, 2H), 0.77 (d,  $J = 6.0$  Hz, 3H);

$^{13}\text{C NMR}$  (100 MHz,  $\text{CDCl}_3$ ):  $\delta$  171.8, 152.5, 140.9, 140.6, 137.9, 133.2, 132.9, 129.6, 127.7, 127.41, 127.37, 116.8, 114.1, 70.2, 69.2, 55.7, 35.6, 21.7, 21.2, 11.4, 10.6;

**HRMS (ESI)**:  $[\text{M}+\text{H}]^+$  Calcd for  $\text{C}_{27}\text{H}_{29}\text{Cl}_1\text{N}_1\text{O}_3^+$ : 450.1830; found: 450.1830;

**HPLC** (Chiralpak IA): *n*-Hexane/*i*-PrOH = 99/1, flow rate 1.0 mL/min,  $T = 30$  °C,  $\lambda = 245$  nm,  $t_{R1} = 7.245$  min (minor),  $t_{R2} = 10.526$  min (major); 98% ee;  $[\alpha]_D^{33.5} = 122.67$  ( $c = 0.2$ ,  $\text{CH}_2\text{Cl}_2$ ).

<Chromatogram>

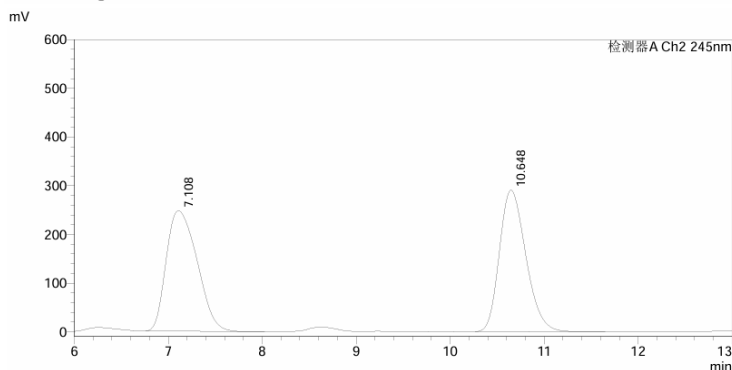

<Peak Table>

| 检测器A Ch2 245nm |           |          |        |        |      |      |
|----------------|-----------|----------|--------|--------|------|------|
| Peak#          | Ret. Time | Area     | Height | Conc.  | Unit | Mark |
| 1              | 7.108     | 5631437  | 247260 | 49.765 |      | M    |
| 2              | 10.648    | 5684519  | 290641 | 50.235 |      | M    |
| 总计             |           | 11315956 | 537901 |        |      |      |

<Chromatogram>

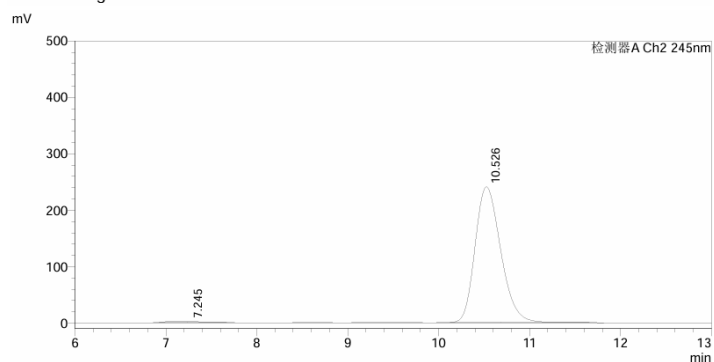

<Peak Table>

| 检测器A Ch2 245nm |           |         |        |        |      |      |
|----------------|-----------|---------|--------|--------|------|------|
| Peak#          | Ret. Time | Area    | Height | Conc.  | Unit | Mark |
| 1              | 7.245     | 40455   | 1322   | 0.850  |      | M    |
| 2              | 10.526    | 4717342 | 240256 | 99.150 |      | M    |
| 总计             |           | 4757796 | 241579 |        |      |      |

**Esopropyl (R)-2-(1-(3-isopropoxyphenyl)cyclopropyl)-2-((4-methoxyphenyl)amino)-2-phenylacetate (3r)**

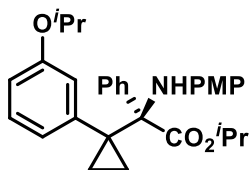

General procedure B was followed using **2h** as an electrophile on 0.1 mmol scale. The reaction mixture was purified by flash column chromatography (silica gel, PE/EtOAc = 20/1~10/1) to afford **3r** as a white solid (32.8 mg, 69%);  $R_f = 0.56$  (PE/EtOAc = 10/1);

$^1\text{H NMR}$  (400 MHz,  $\text{CDCl}_3$ ):  $\delta$  7.78–7.76 (m, 2H), 7.24–7.21 (m, 3H), 7.05 (t,  $J = 7.6$  Hz, 1H), 6.75 (d,  $J = 8.0$  Hz, 1H), 6.68 (dd,  $J = 8.4, 2.4$  Hz, 1H), 6.61 (t,  $J = 2.4$  Hz, 1H), 6.54 (d,  $J = 9.2$  Hz, 2H), 6.21 (d,  $J = 8.8$  Hz, 2H), 4.84 (sept,  $J = 6.0$  Hz, 1H), 4.60 (bs, 1H), 4.36 (sept,  $J = 6.0$  Hz, 1H), 3.64 (s, 3H), 1.30–1.25 (m, 7H), 1.02 (d,  $J = 6.0$  Hz, 3H), 1.00–0.97 (m, 1H), 0.84–0.80 (m, 2H), 0.75 (d,  $J = 6.4$  Hz, 3H);

$^{13}\text{C NMR}$  (100 MHz,  $\text{CDCl}_3$ ):  $\delta$  172.1, 157.3, 152.1, 143.7, 140.9, 137.8, 129.8, 128.6, 127.4, 127.3, 124.2, 119.7, 116.6, 115.0, 114.0, 70.1, 70.0, 69.0, 55.7, 35.8, 22.2, 21.7, 21.2, 11.1, 10.6;

**HRMS (ESI)**:  $[\text{M}+\text{H}]^+$  Calcd for  $\text{C}_{30}\text{H}_{36}\text{NO}_4^+$ : 474.2639; found: 474.2636;

**HPLC** (Chiralcel AD-H): *n*-Hexane/*i*-PrOH = 99/1, flow rate 1.0 mL/min,  $T = 30$  °C,  $\lambda = 254$  nm,  $t_{R1} = 10.320$  min (minor),  $t_{R2} = 16.449$  min (major); 99% ee;  $[\alpha]_D^{33.5} = 228.64$  ( $c = 0.15$ ,  $\text{CH}_2\text{Cl}_2$ ).

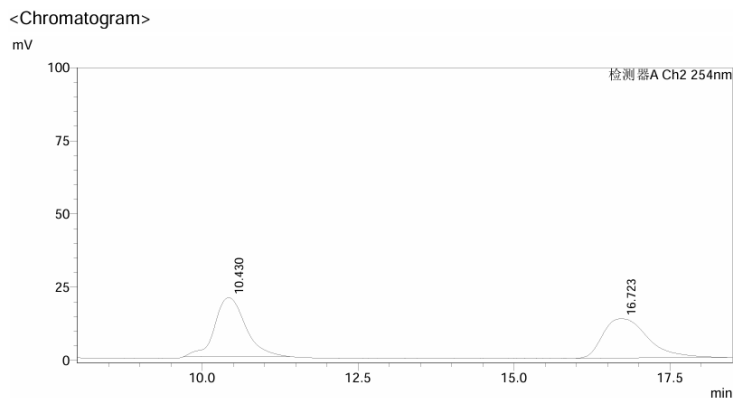

<Peak Table>

| 检测器A Ch2 254nm |           |         |        |        |      |      |
|----------------|-----------|---------|--------|--------|------|------|
| Peak#          | Ret. Time | Area    | Height | Conc.  | Unit | Mark |
| 1              | 10.430    | 700318  | 20097  | 50.942 |      | M    |
| 2              | 16.723    | 674406  | 13407  | 49.058 |      | M    |
| 总计             |           | 1374724 | 33504  |        |      |      |

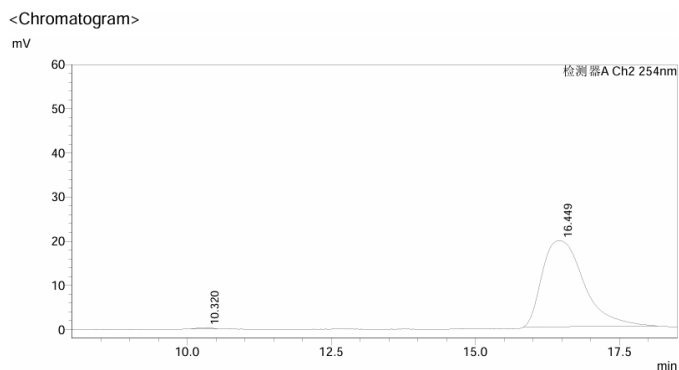

<Peak Table>

| 检测器A Ch2 254nm |           |        |        |        |      |      |
|----------------|-----------|--------|--------|--------|------|------|
| Peak#          | Ret. Time | Area   | Height | Conc.  | Unit | Mark |
| 1              | 10.320    | 2192   | 129    | 0.222  |      | M    |
| 2              | 16.449    | 984125 | 19454  | 99.778 |      | M    |
| 总计             |           | 986317 | 19582  |        |      |      |

### Isopropyl phenylacetate (3s)

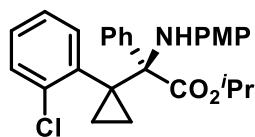

### (R)-2-(1-(2-chlorophenyl)cyclopropyl)-2-((4-methoxyphenyl)amino)-2-

phenylacetate (3s)  
 General procedure B was followed using **2i** as an electrophile on 0.2 mmol scale for 40 hours. The reaction mixture was purified by flash column chromatography (silica gel, PE/EtOAc = 20/1) to afford **3s** as a white solid (52.3 mg, 58%);  $R_f = 0.67$  (PE/EtOAc = 10/1);

$^1\text{H NMR}$  (400 MHz, DMSO- $d_6$ ):  $\delta$  7.83–7.56 (m, 2H), 7.31 (d,  $J = 8.0$  Hz, 2H), 7.23–7.84 (m, 6H), 6.55 (d,  $J = 8.0$  Hz, 2H), 6.21 (d,  $J = 8.0$  Hz, 2H), 5.62 (bs, 1H), 4.66 (sept,  $J = 6.0$  Hz, 1H), 3.54 (s, 3H), 1.23–1.18 (m, 1H), 0.93–0.84 (m, 6H), 0.63 (s, 3H);

$^{13}\text{C NMR}$  (100 MHz, DMSO- $d_6$ ):  $\delta$  171.0, 151.6, 140.4, 139.5, 137.8, 135.7, 135.0, 129.7, 129.4, 128.7, 127.3, 127.0, 126.3, 115.9, 113.8, 70.8, 68.5, 55.2, 32.9, 21.2, 20.7, 13.1;

**HRMS (ESI)**:  $[\text{M}+\text{H}]^+$  Calcd for  $\text{C}_{27}\text{H}_{29}\text{ClNO}_3^+$ : 450.1830; found: 450.1828;

**HPLC** (Chiralpak IA): *n*-Hexane/*i*-PrOH = 99/1, flow rate 1.0 mL/min,  $T = 30$  °C,  $\lambda = 220$  nm,  $t_{R1} = 6.875$  min (minor),  $t_{R2} = 10.298$  min (major); 98% ee;  $[\alpha]_D^{33.5} = 119.41$  ( $c = 0.11$ ,  $\text{CH}_2\text{Cl}_2$ ).

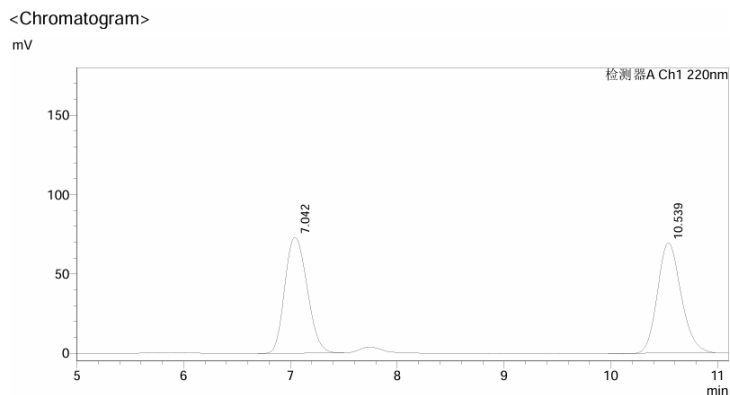

<Peak Table>

| 检测器A Ch1 220nm |           |         |        |        |      |      |
|----------------|-----------|---------|--------|--------|------|------|
| Peak#          | Ret. Time | Area    | Height | Conc.  | Unit | Mark |
| 1              | 7.042     | 1063658 | 73059  | 50.022 |      | M    |
| 2              | 10.539    | 1062738 | 69362  | 49.978 |      | M    |
| 总计             |           | 2126395 | 142421 |        |      |      |

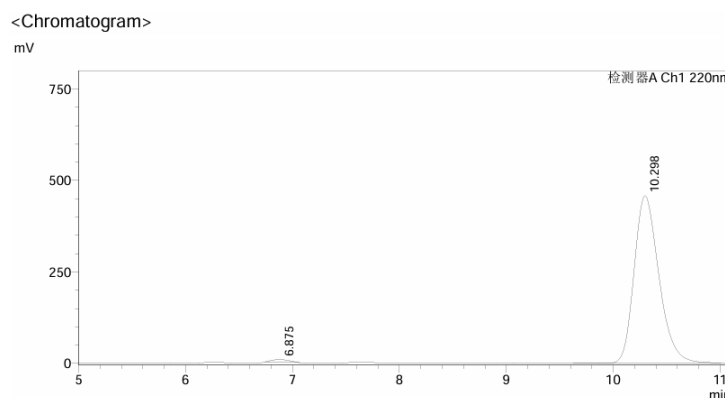

<Peak Table>

| 检测器A Ch1 220nm |           |         |        |        |      |      |
|----------------|-----------|---------|--------|--------|------|------|
| Peak#          | Ret. Time | Area    | Height | Conc.  | Unit | Mark |
| 1              | 6.875     | 84720   | 7338   | 1.135  |      | M    |
| 2              | 10.298    | 7379732 | 457737 | 98.865 |      | M    |
| 总计             |           | 7464452 | 465075 |        |      |      |

**Isopropyl  
cyclopropyl)acetate (3t)**

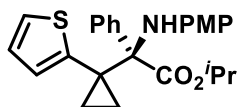

**(R)-2-((4-methoxyphenyl)amino)-2-phenyl-2-(1-(thiophen-2-yl)cyclopropyl)acetate (3t)**

General procedure B was followed using **2j** as an electrophile on 0.1 mmol scale. The reaction mixture was purified by flash column chromatography (silica gel, PE/EtOAc = 20/1) to afford **3t** as a white solid (32.7 mg, 78%);  $R_f$  = 0.57 (PE/EtOAc = 10/1);

$^1\text{H NMR}$  (400 MHz,  $\text{CDCl}_3$ ):  $\delta$  7.74–7.70 (m, 2H), 7.26–7.22 (m, 3H), 7.06 (dd,  $J$  = 4.8, 1.2 Hz, 1H), 6.76 (dd,  $J$  = 5.2, 3.6 Hz, 1H), 6.70 (dd,  $J$  = 3.6, 1.2 Hz, 1H), 6.57 (d,  $J$  = 9.2 Hz, 2H), 6.28 (d,  $J$  = 8.8 Hz, 2H), 4.90 (sept,  $J$  = 6.4 Hz, 1H), 4.64 (bs, 1H), 3.66 (s, 3H), 3.70–3.66 (m, 4H), 1.42–1.36 (m, 1H), 1.17–1.12 (m, 1H), 1.09 (d,  $J$  = 6.0 Hz, 3H), 1.04–0.95 (m, 2H), 0.85 (d,  $J$  = 6.4 Hz, 3H);

$^{13}\text{C NMR}$  (100 MHz,  $\text{CDCl}_3$ ):  $\delta$  171.7, 152.3, 146.5, 140.7, 137.7, 129.6, 128.6, 127.5, 125.9, 125.1, 116.7, 114.0, 70.6, 69.3, 55.7, 30.8, 21.7, 21.2, 13.2, 12.7.

**HRMS (ESI)**:  $[\text{M}+\text{H}]^+$  Calcd for  $\text{C}_{25}\text{H}_{28}\text{NO}_3\text{S}^+$ : 422.1784; found: 422.1783;

**HPLC** (Chiralpak IA):  $n$ -Hexane/ $i$ -PrOH = 99/1, flow rate 1.0 mL/min,  $T$  = 30 °C,  $\lambda$  = 220 nm,  $t_{R1}$  = 7.319 min (minor),  $t_{R2}$  = 9.320 min (major); 98% ee;  $[\alpha]_D^{33.5}$  = 188.08 ( $c$  = 0.17,  $\text{CH}_2\text{Cl}_2$ ).

<Chromatogram>

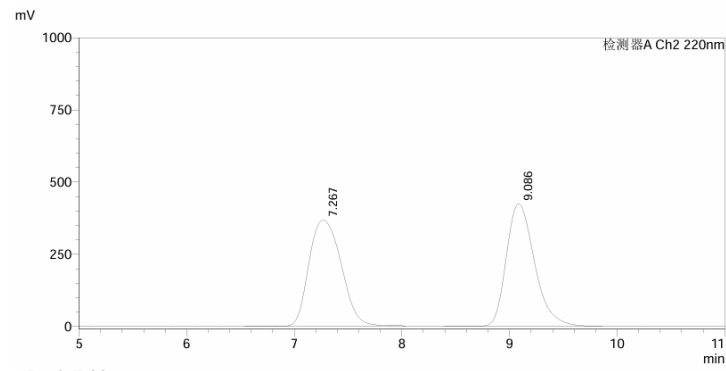

<Peak Table>

| 检测器A Ch2 220nm |           |          |        |        |      |      |
|----------------|-----------|----------|--------|--------|------|------|
| Peak#          | Ret. Time | Area     | Height | Conc.  | Unit | Mark |
| 1              | 7.267     | 7594369  | 366887 | 49.845 |      | M    |
| 2              | 9.086     | 7641546  | 422273 | 50.155 |      | M    |
| 总计             |           | 15235915 | 789160 |        |      |      |

<Chromatogram>

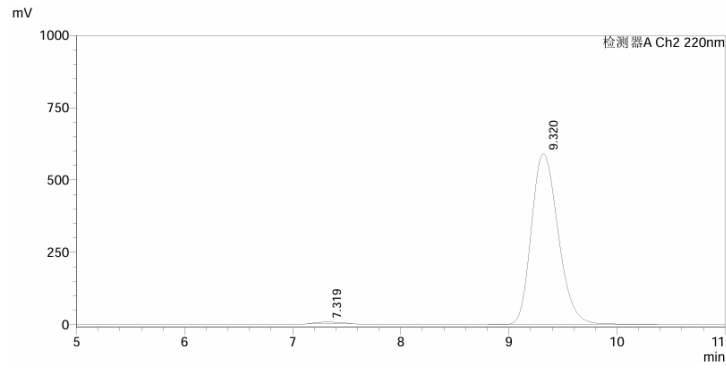

<Peak Table>

| 检测器A Ch2 220nm |           |          |        |        |      |      |
|----------------|-----------|----------|--------|--------|------|------|
| Peak#          | Ret. Time | Area     | Height | Conc.  | Unit | Mark |
| 1              | 7.319     | 87796    | 5595   | 0.861  |      | M    |
| 2              | 9.320     | 10104452 | 590808 | 99.139 |      | M    |
| 总计             |           | 10192248 | 596404 |        |      |      |

## Synthetic Applications

### (A) Gram-scale reaction

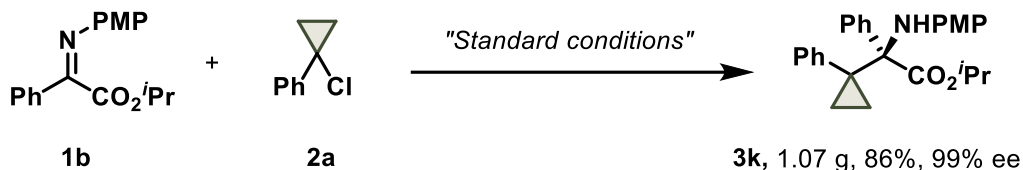

To an oven-dried 100 mL Schlenk tube equipped with a magnetic stir bar were added ligand **L2** (0.36 mmol, 12 mol%), In (6.0 mmol, 2.0 equiv) and imine **1a** (3.0 mmol, 1.0 equiv). Then the vial was transferred into the glovebox, CoI<sub>2</sub> (0.3 mmol, 10 mol%), MeCN (0.2 M), cyclopropyl chloride compounds **2a** (4.5 mmol, 1.5 equiv) and <sup>i</sup>PrOH (3.0 mmol, 1.0 equiv) were added in sequence. The reaction vial was capped and stirred at 50 °C for 20 hours. After completion, the reaction mixture was filtered through a pad of silica gel and the filter cake was washed with EtOAc. The resulted filtrate was concentrated under reduced pressure to give the crude product, which was purified by silica gel flash column chromatography (silica gel, PE/EtOAc = 20/1~10/1) to afford **3a** as a white solid (1.07 g, 86%, 99% ee)

### (B) Derivatization of products

#### Isopropyl (*R*)-2-amino-2-phenyl-2-(1-phenylcyclopropyl)acetate (**4**)

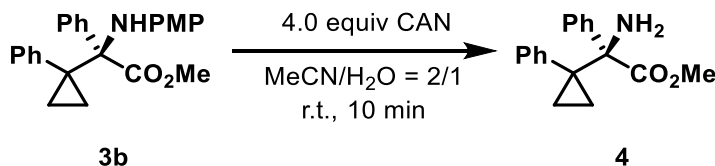

To a solution of **3b** (0.5 mmol, 1.0 equiv) in MeCN (5.0 mL) was added CAN (2.0 mmol, 4.0 equiv) in H<sub>2</sub>O (2.5 mL) dropwise at 0 °C. The reaction mixture was stirred at 0 °C for 10 min. After completion, the reaction mixture was diluted with H<sub>2</sub>O and extracted with DCM for 3 times. The combined organic layer was dried over Na<sub>2</sub>SO<sub>4</sub>, filtered, and concentrated under reduced pressure to give the crude product, which was purified by silica gel flash column chromatography (silica gel, PE/EtOAc = 10/1~5/1) to afford **4** as a dark red oil (134 mg, 95%, 99% ee), *R<sub>f</sub>* = 0.48 (PE/EtOAc = 8/1);

**<sup>1</sup>H NMR** (400 MHz, CDCl<sub>3</sub>): δ 7.73 (dd, *J* = 8.4, 1.6 Hz, 2H), 7.43 (d, *J* = 6.8 Hz, 2H), 7.35–7.29 (m, 3H), 7.25–7.19 (m, 3H), 3.72 (s, 3H), 1.89 (bs, 2H), 0.97–0.90 (m, 1H), 0.88–0.83 (m, 1H), 0.69–0.62 (m, 2H);

**<sup>13</sup>C NMR** (100 MHz, CDCl<sub>3</sub>): δ 175.2, 142.8, 139.2, 132.3, 128.0, 127.82, 127.79, 127.2, 67.9, 52.3, 33.0, 10.7, 9.0;

**HRMS (ESI)**: [M+H]<sup>+</sup> Calcd for C<sub>18</sub>H<sub>20</sub>NO<sub>2</sub><sup>+</sup>: 282.1489; found: 282.1487;

**HPLC** (Chiralpak IA): *n*-Hexane/*i*-PrOH = 99/1, flow rate 1.0 mL/min, T = 30 °C, λ = 220 nm, tR1 = 5.472 min (major), tR2 = 6.715 min (minor); 99% ee; [α]<sub>D</sub><sup>33.5</sup> = -21.36 (c = 0.29, CH<sub>2</sub>Cl<sub>2</sub>).

<Chromatogram>

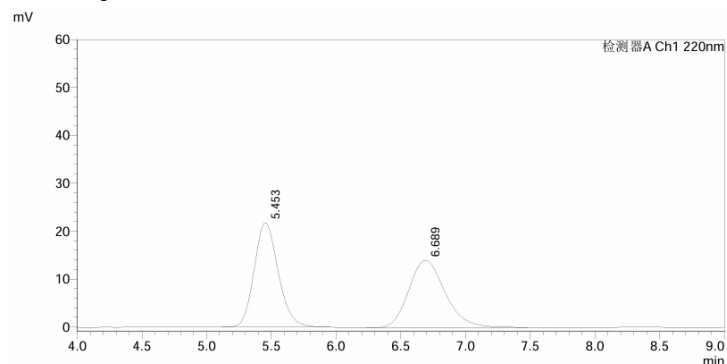

<Peak Table>

| Peak# | Ret. Time | Area   | Height | Conc.  | Unit | Mark |
|-------|-----------|--------|--------|--------|------|------|
| 1     | 5.453     | 279172 | 21739  | 50.373 |      | M    |
| 2     | 6.689     | 275042 | 14085  | 49.627 |      | M    |
| 总计    |           | 554214 | 35824  |        |      |      |

<Chromatogram>

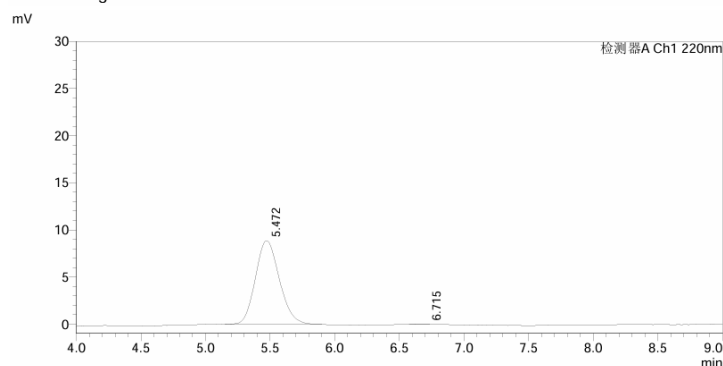

<Peak Table>

| Peak# | Ret. Time | Area   | Height | Conc.  | Unit | Mark |
|-------|-----------|--------|--------|--------|------|------|
| 1     | 5.472     | 114171 | 8872   | 99.926 |      | M    |
| 2     | 6.715     | 84     | 15     | 0.074  |      | M    |
| 总计    |           | 114255 | 8887   |        |      |      |

### (*R*)-2-amino-2-phenyl-2-(1-phenylcyclopropyl)acetic acid (**5**)

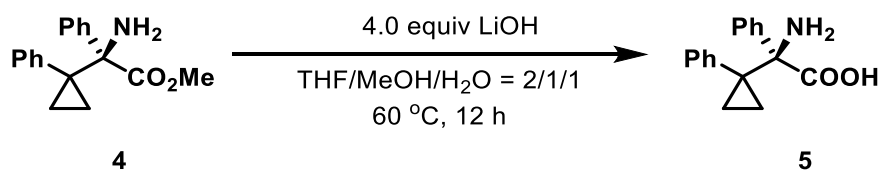

To a solution of **4** (0.036 mmol, 1.0 equiv) in mixed solvent (THF/MeOH/H<sub>2</sub>O = 2/1/1, 0.025 M) was added LiOH (0.144 mmol, 4.0 equiv). The resulting mixture was stirred at 60 °C overnight. After completion, the reaction was diluted with H<sub>2</sub>O and then acidified with 1M HCl to pH = 1. The aqueous was washed with EtOAc for 3 times and concentrated under reduced pressure. The residue was dissolved in MeOH, filtered, and the filter cake was washed with MeOH. The resulting filtrate was concentrated in vacuo to afford a white solid **5** (9.2 mg, 96%).

<sup>1</sup>H NMR (400 MHz, CD<sub>3</sub>OD): δ 7.75 (d, *J* = 7.2 Hz, 1H), 7.53–7.46 (m, 5H), 7.36 (d, *J* = 7.6 Hz, 2H), 7.33–7.29 (m, 2H), 1.13–1.07 (m, 1H), 1.02–0.86 (m, 3H);



$^{13}\text{C}$  NMR (100 MHz,  $\text{CD}_3\text{OD}$ ):  $\delta$  170.4, 140.5, 136.2, 133.1, 130.8, 130.3, 129.5, 129.4, 129.1, 128.4, 128.0, 126.0, 68.9, 31.6, 11.8, 10.6;

HRMS (ESI):  $[\text{M}+\text{H}]^+$  Calcd for  $\text{C}_{17}\text{H}_{18}\text{NO}_2^+$ : 268.1332; found: 268.1330;

**(R)-2-((4-methoxyphenyl)amino)-2-phenyl-2-(1-phenylcyclopropyl)ethan-1-ol (6)**

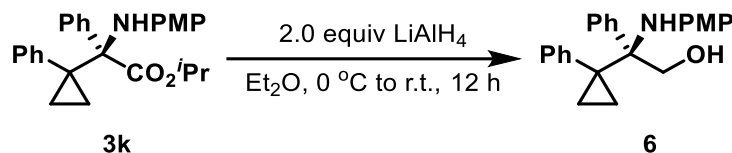

To a solution of **3k** (0.1 mmol, 1.0 equiv) in  $\text{Et}_2\text{O}$  (1.0 mL, 0.1 M) was added  $\text{LiAlH}_4$  (0.2 mmol, 2.0 equiv) at  $0\text{ }^\circ\text{C}$ , and then the resulting mixture was slowly warmed to room temperature. After stirring for 12 h at room temperature, the reaction was quenched with 1M HCl, extracted with EtOAc for 3 times. The combined organic layers were dried over  $\text{Na}_2\text{SO}_4$  and then filtered. After removal of the solvent, the residue was purified by silica gel flash column chromatography (silica gel, PE/EtOAc = 5/1) to afford colorless oil **6** (33.9mg, 94%, 99% ee).  $R_f$  = 0.43 (PE/EtOAc = 5/1);

$^1\text{H}$  NMR (400 MHz,  $\text{CDCl}_3$ ):  $\delta$  7.30–7.24 (m, 3H), 7.22–7.13 (m, 5H), 7.08–7.02 (m, 2H), 6.58 (d,  $J$  = 8.4 Hz, 2H), 6.34 (d,  $J$  = 8.4 Hz, 2H), 4.28–4.19 (m, 2H), 4.08 (bs, 1H), 3.67 (s, 3H), 1.94 (bs, 1H), 1.36–1.22 (m, 2H), 0.87–0.77 (m, 2H);

$^{13}\text{C}$  NMR (100 MHz,  $\text{CDCl}_3$ ):  $\delta$  152.7, 143.0, 141.8, 139.1, 132.3, 127.9, 127.8, 127.7, 127.1, 127.0, 117.6, 114.6, 63.6, 62.9, 55.7, 34.6, 10.6, 9.0;

HRMS (ESI):  $[\text{M}+\text{H}]^+$  Calcd for  $\text{C}_{24}\text{H}_{26}\text{NO}_2^+$ : 360.1958; found: 360.1958;

HPLC (Chiralpak AD-H): n-Hexane/*i*-PrOH = 95/5, flow rate 1.0 mL/min,  $T$  =  $30\text{ }^\circ\text{C}$ ,  $\lambda$  = 254 nm,  $t_{R1}$  = 14.865 min (minor),  $t_{R2}$  = 17.170 min (major); 99% ee;  $[\alpha]_D^{33.5}$  = 85.38 ( $c$  = 0.16,  $\text{CH}_2\text{Cl}_2$ ).

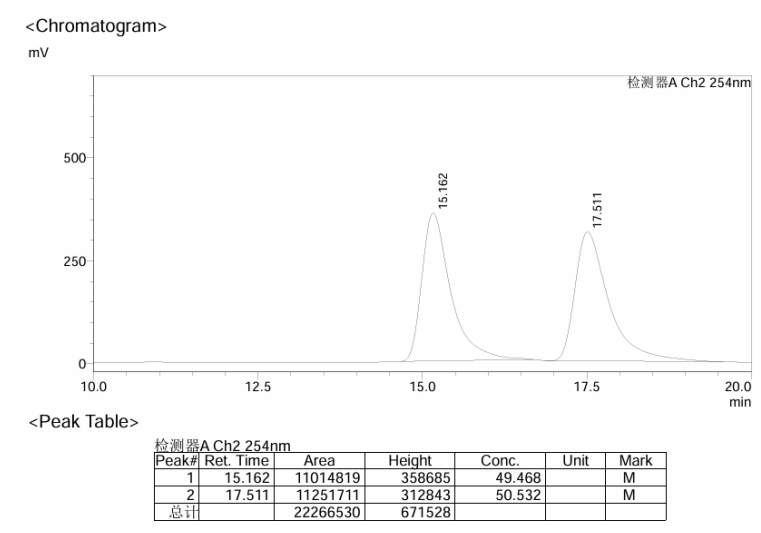

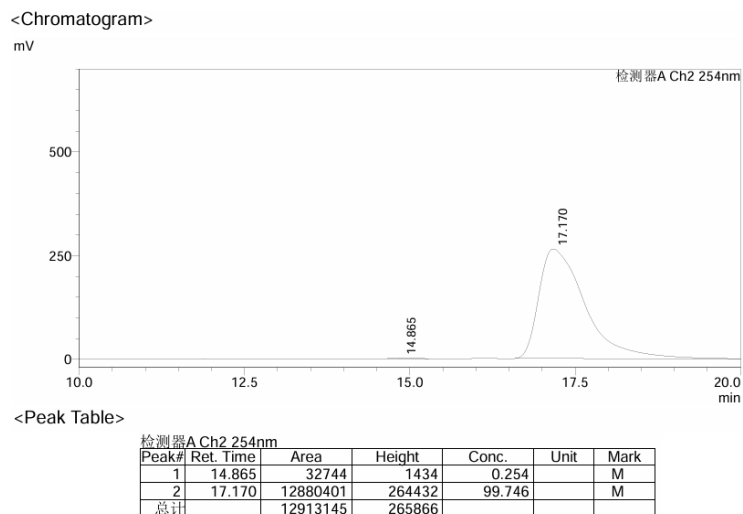

**(R)-1-(4-methoxyphenyl)-2-phenyl-2-(1-phenylcyclopropyl)aziridine (7)**

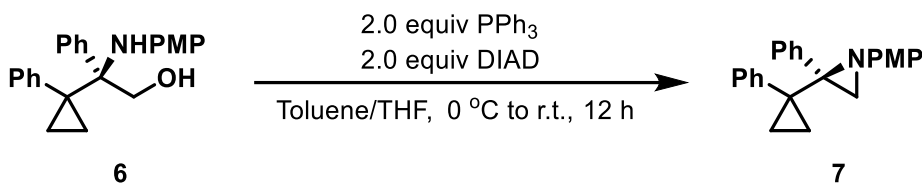

To a solution of **6** (0.1 mmol, 1.0 equiv) in THF (1.0 mL, 0.1 M) was added PPh<sub>3</sub> (0.105 mmol, 1.05 equiv) and DIAD (2.0 M in toluene, 2.0 equiv) at 0 °C under nitrogen atmosphere. The resulting mixture was stirred at room temperature for 12 hours. After completion, the reaction was quenched with H<sub>2</sub>O, filtered through a pad of diatomite and the filter cake was washed with EtOAc. The resulting mixture was extracted with EA for three times and the combined organic layer was washed with brine, dried over Na<sub>2</sub>SO<sub>4</sub>, filtered and concentrated under reduced pressure to give the crude product, which was purified by silica gel flash column chromatography (silica gel, PE/EtOAc = 20/1) to afford white solid **7** (26.4mg, 77%, 95% ee). *R<sub>f</sub>* = 0.80 (PE/EtOAc = 10/1);

<sup>1</sup>H NMR (400 MHz, CDCl<sub>3</sub>): δ 7.18–7.11 (m, 6H), 7.07–6.99 (m, 4H), 6.62–6.56 (m, 4H), 3.65 (s, 3H), 2.96 (s, 1H), 2.73 (s, 1H), 1.51–1.47 (m, 1H), 1.44–1.39 (m, 2H), 0.57–0.53 (m, 1H);

<sup>13</sup>C NMR (100 MHz, CDCl<sub>3</sub>): δ 154.7, 143.8, 142.3, 136.2, 129.8, 128.7, 128.0, 127.6, 127.1, 125.8, 122.1, 113.8, 55.5, 51.3, 36.6, 29.5, 13.2, 11.3.

HRMS (ESI): [M+H]<sup>+</sup> Calcd for C<sub>24</sub>H<sub>24</sub>NO<sub>1</sub><sup>+</sup>: 342.1852; found: 342.1852;

HPLC (Chiralpak IBN): *n*-Hexane/*i*-PrOH = 99.5/0.5, flow rate 1.0 mL/min, T = 30 °C, λ = 254 nm, t<sub>R1</sub> = 13.803 min (major), t<sub>R2</sub> = 15.994 min (minor); 95% ee; [α]<sub>D</sub><sup>33.5</sup> = -66.55 (c = 0.37, CH<sub>2</sub>Cl<sub>2</sub>).

<Chromatogram>

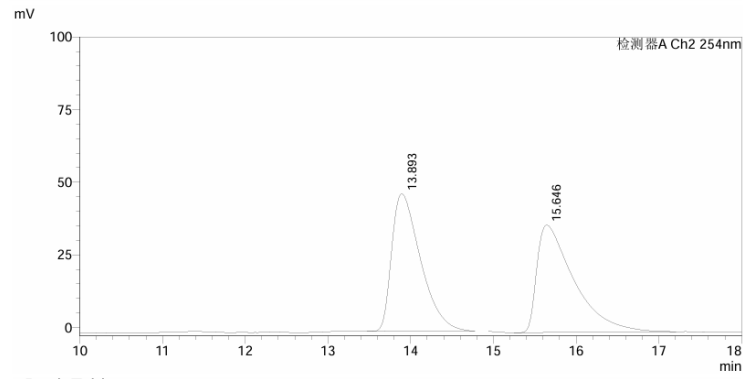

<Peak Table>

| 检测器A Ch2 254nm |           |         |        |        |      |      |
|----------------|-----------|---------|--------|--------|------|------|
| Peak#          | Ret. Time | Area    | Height | Conc.  | Unit | Mark |
| 1              | 13.893    | 1144665 | 47333  | 49.928 |      | M    |
| 2              | 15.646    | 1147966 | 36952  | 50.072 |      | M    |
| 总计             |           | 2292632 | 84285  |        |      |      |

<Chromatogram>

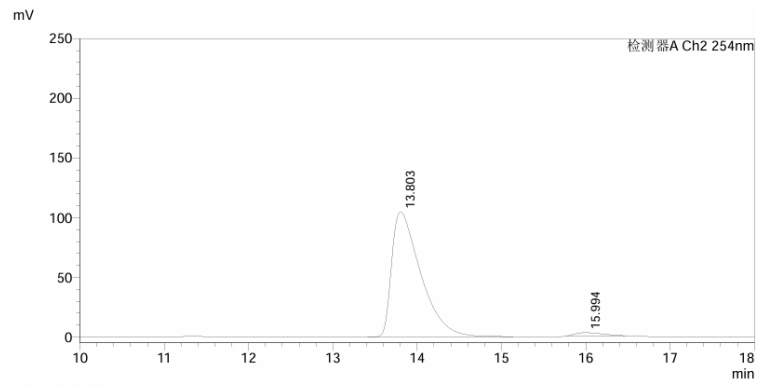

<Peak Table>

| 检测器A Ch2 254nm |           |         |        |        |      |      |
|----------------|-----------|---------|--------|--------|------|------|
| Peak#          | Ret. Time | Area    | Height | Conc.  | Unit | Mark |
| 1              | 13.803    | 2494646 | 104656 | 97.672 |      | M    |
| 2              | 15.994    | 59457   | 2663   | 2.328  |      | M    |
| 总计             |           | 2554103 | 107319 |        |      |      |

## Crystallographic Data

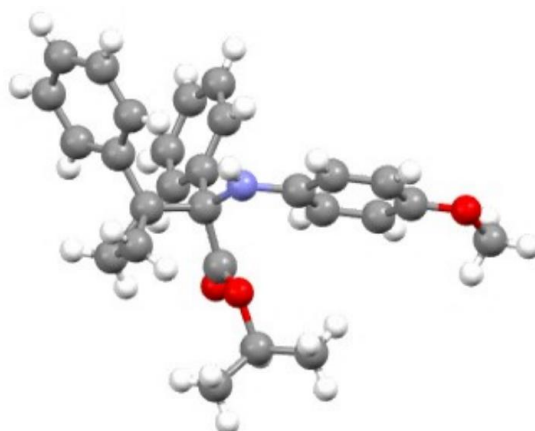

**Fig S1. Crystal data and structure refinement for 3k (CCDC 2355497)**

|                                   |                                                  |          |
|-----------------------------------|--------------------------------------------------|----------|
| Identification code               | 240507cyf                                        |          |
| Empirical formula                 | C <sub>27</sub> H <sub>29</sub> N O <sub>3</sub> |          |
| Formula weight                    | 415.51                                           |          |
| Temperature                       | 170.00 K                                         |          |
| Wavelength                        | 1.34139 Å                                        |          |
| Crystal system                    | Orthorhombic                                     |          |
| Space group                       | P212121                                          |          |
| Unit cell dimensions              | a = 11.3423(2) Å                                 | α = 90 ° |
|                                   | b = 13.4728(2) Å                                 | β = 90 ° |
|                                   | c = 14.6164(2) Å                                 | γ = 90 ° |
| Volume                            | 2233.57(6) Å <sup>3</sup>                        |          |
| Z                                 | 4                                                |          |
| Density (calculated)              | 1.236 Mg/m <sup>3</sup>                          |          |
| Absorption coefficient            | 0.403 mm <sup>-1</sup>                           |          |
| F(000)                            | 888                                              |          |
| Crystal size                      | 0.17 x 0.17 x 0.05 mm <sup>3</sup>               |          |
| Theta range for data collection   | 3.882 to 54.890 °                                |          |
| Index ranges                      | -13 ≤ h ≤ 13, -15 ≤ k ≤ 16, -16 ≤ l ≤ 17         |          |
| Reflections collected             | 28341                                            |          |
| Independent reflections           | 4228 [R(int) = 0.0429]                           |          |
| Completeness to theta = 53.594 °  | 99.2 %                                           |          |
| Absorption correction             | Semi-empirical from equivalents                  |          |
| Max. and min. transmission        | 0.7508 and 0.6486                                |          |
| Refinement method                 | Full-matrix least-squares on F <sup>2</sup>      |          |
| Data / restraints / parameters    | 4228 / 0 / 283                                   |          |
| Goodness-of-fit on F <sup>2</sup> | 1.046                                            |          |
| Final R indices [I > 2σ(I)]       | R1 = 0.0295, wR2 = 0.0790                        |          |
| R indices (all data)              | R1 = 0.0299, wR2 = 0.0794                        |          |
| Absolute structure parameter      | 0.05(5)                                          |          |
| Extinction coefficient            | n/a                                              |          |
| Largest diff. peak and hole       | 0.306 and -0.353 e.Å <sup>-3</sup>               |          |

## References

1. C. A. Ogle, P. A. Riley, J. J. Dorchak and J. L. Hubbard, *The Journal of Organic Chemistry*, 1988, **53**, 4409-4412.
2. J. R. Van der Vecht, H. Steinberg and T. J. De Boer, *Recueil des Travaux Chimiques des Pays-Bas*, 1976, **95**, 149-152.

# NMR Spectrum

<sup>1</sup>H NMR-spectrum (400 MHz, CDCl<sub>3</sub>) of **2b**

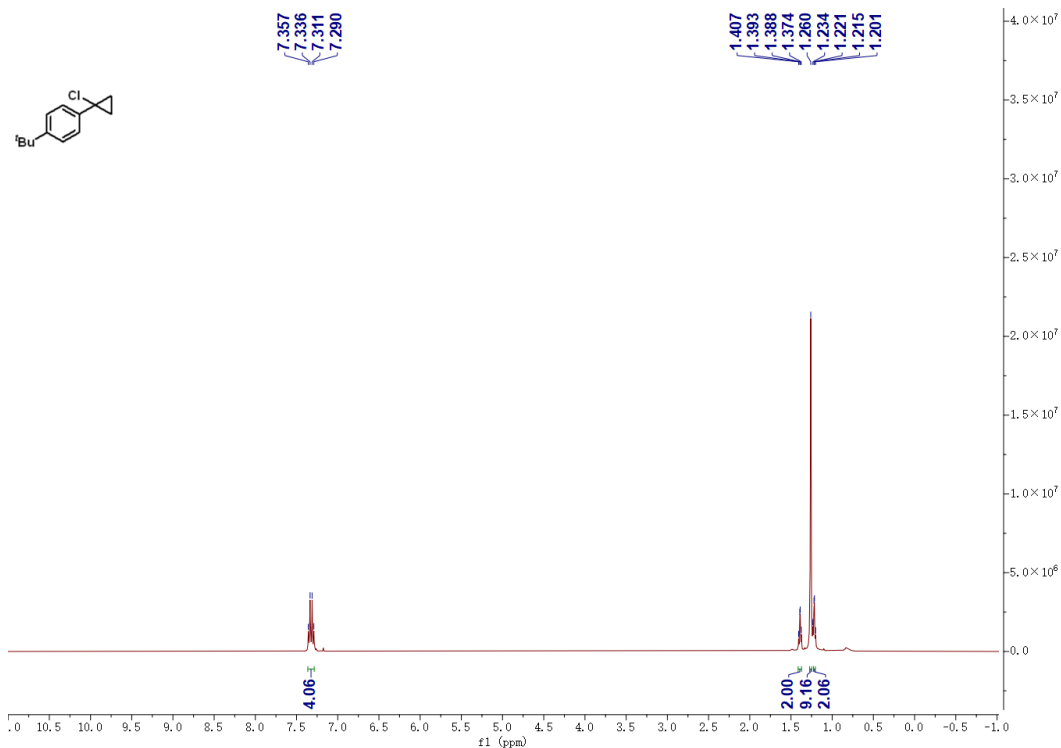

<sup>13</sup>C NMR-spectrum (100 MHz, CDCl<sub>3</sub>) of **2b**

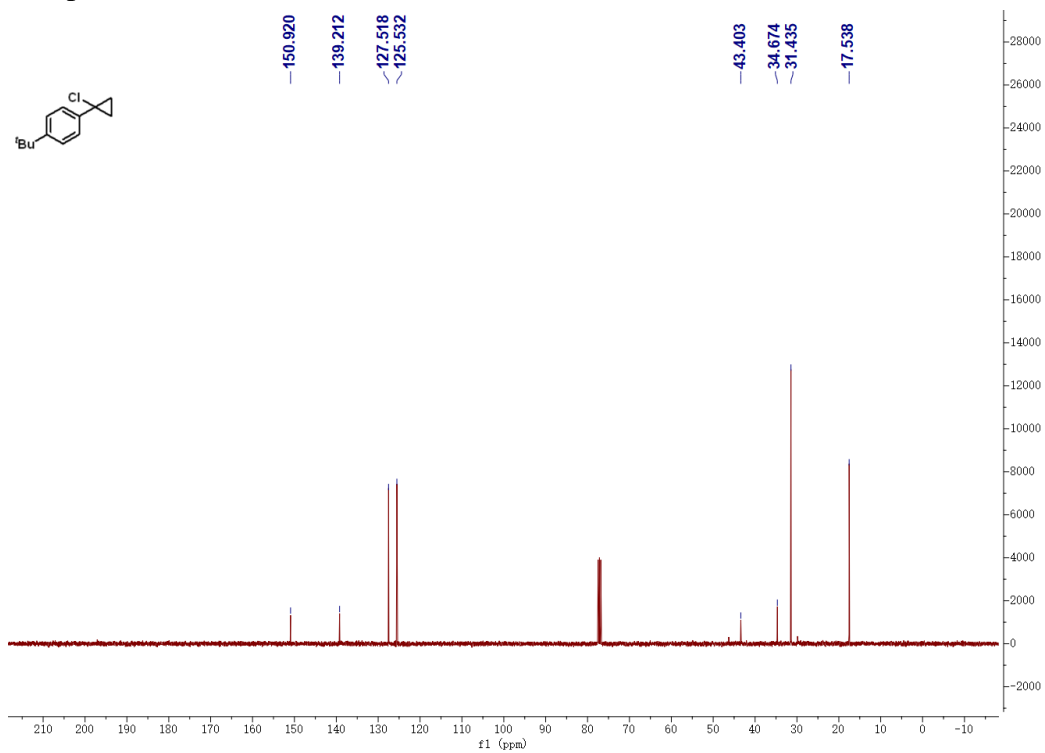

**$^1\text{H}$  NMR-spectrum (400 MHz,  $\text{CDCl}_3$ ) of **2c****

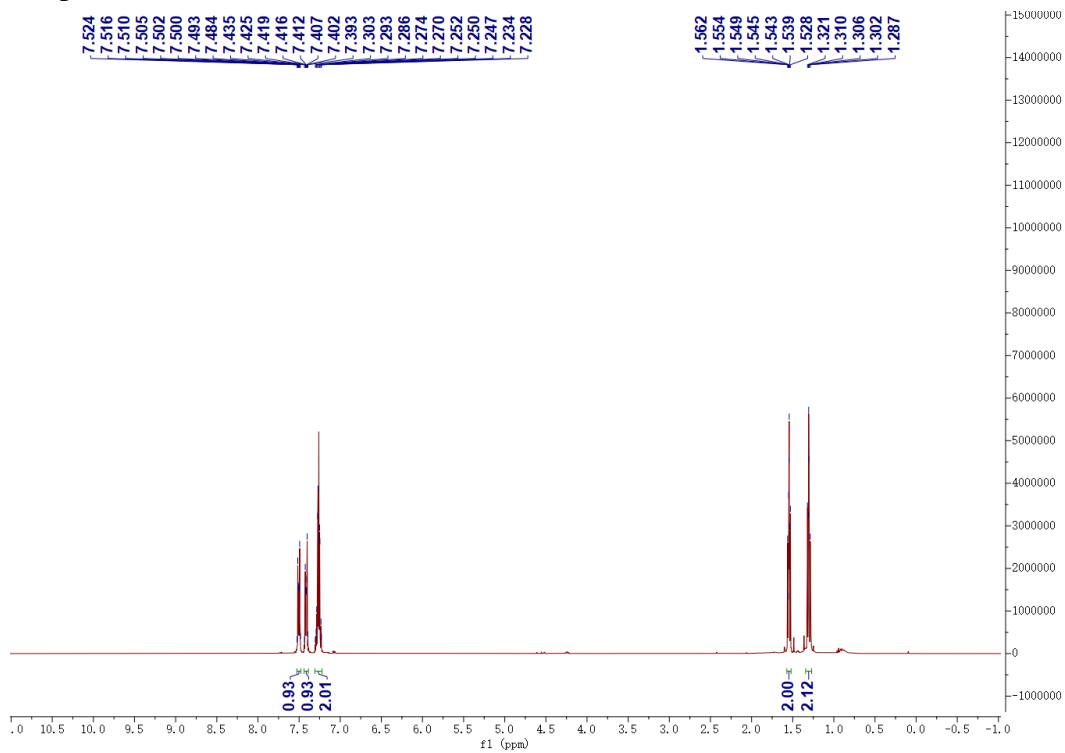

**$^{13}\text{C}$  NMR-spectrum (100 MHz,  $\text{CDCl}_3$ ) of **2c****

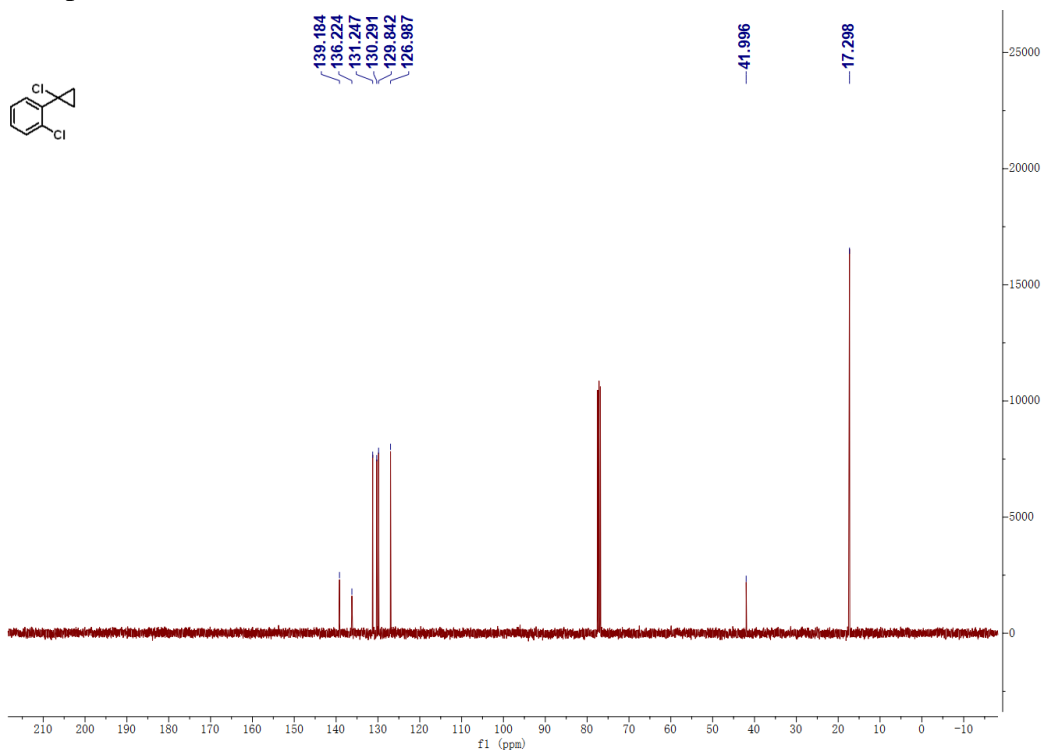

<sup>1</sup>H NMR-spectrum (400 MHz, CDCl<sub>3</sub>) of **2e**

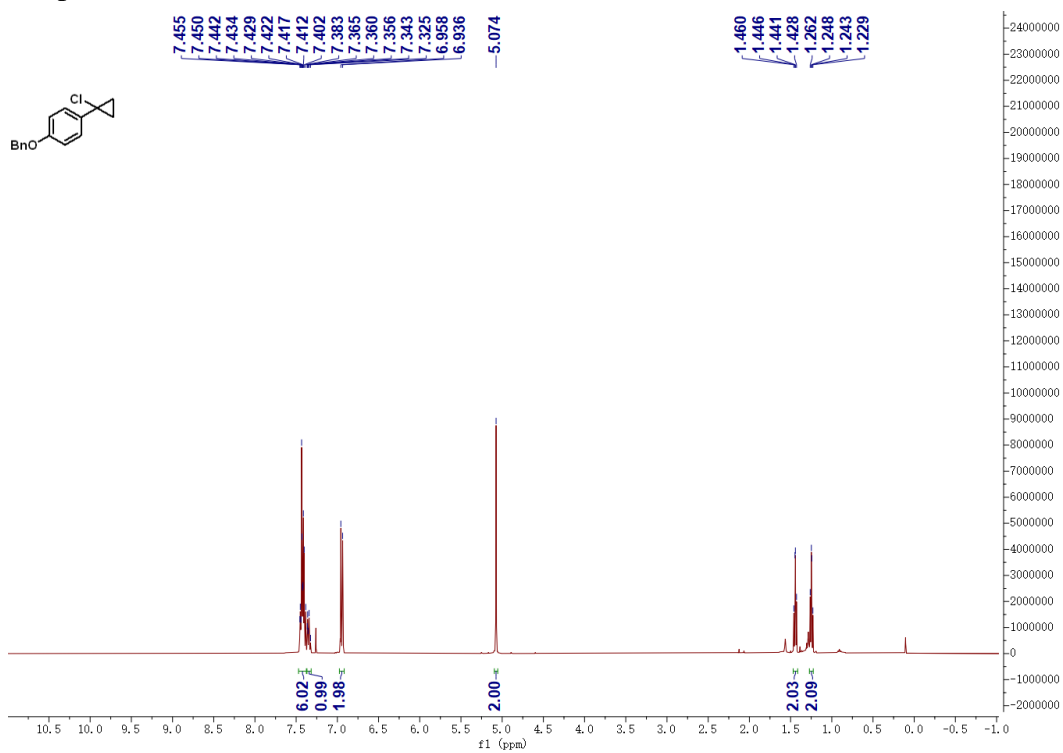

<sup>13</sup>C NMR-spectrum (100 MHz, CDCl<sub>3</sub>) of **2e**

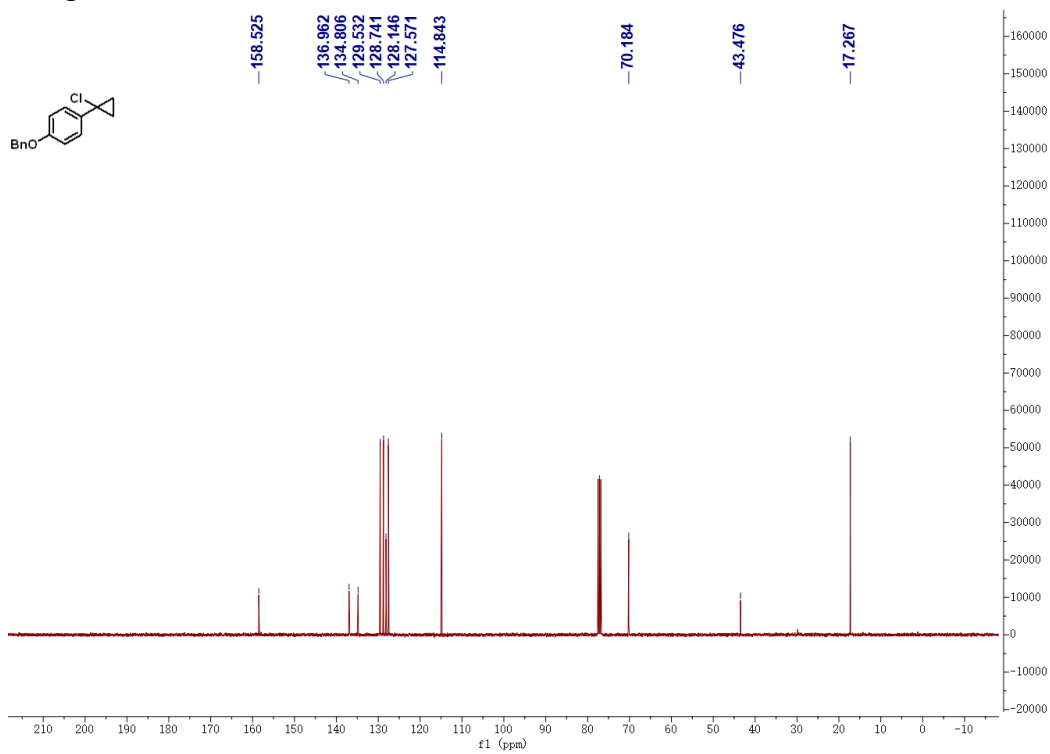



**<sup>1</sup>H NMR-spectrum (400 MHz, CDCl<sub>3</sub>) of 2f**

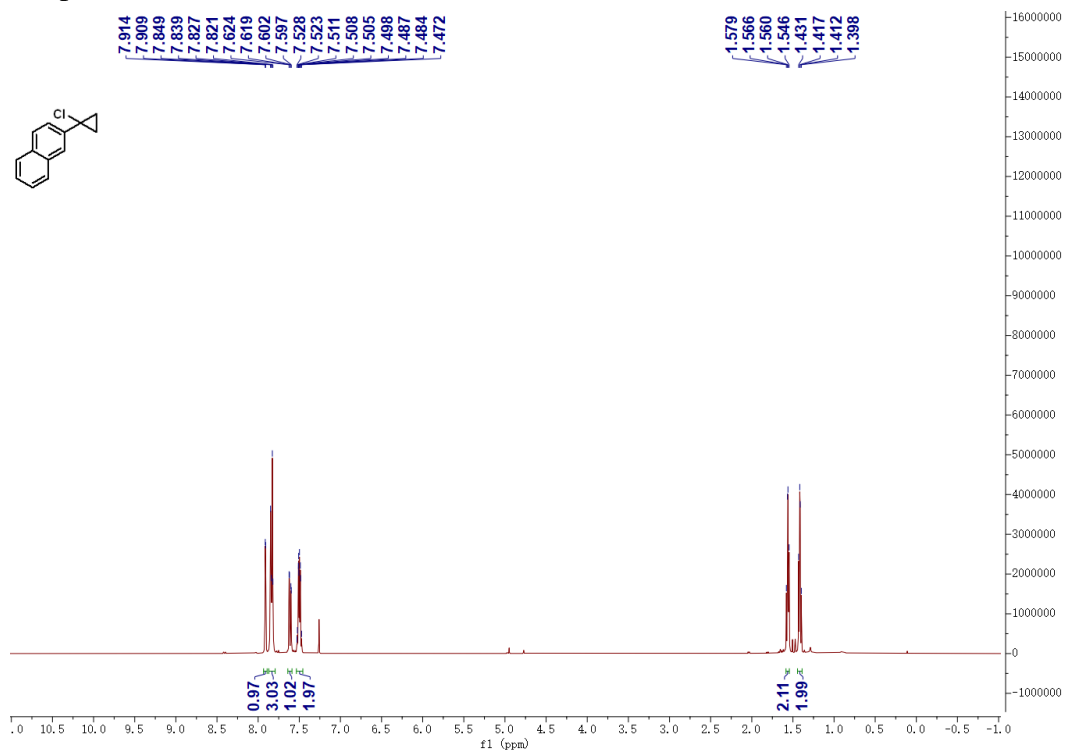

**<sup>13</sup>C NMR-spectrum (100 MHz, CDCl<sub>3</sub>) of 2f**

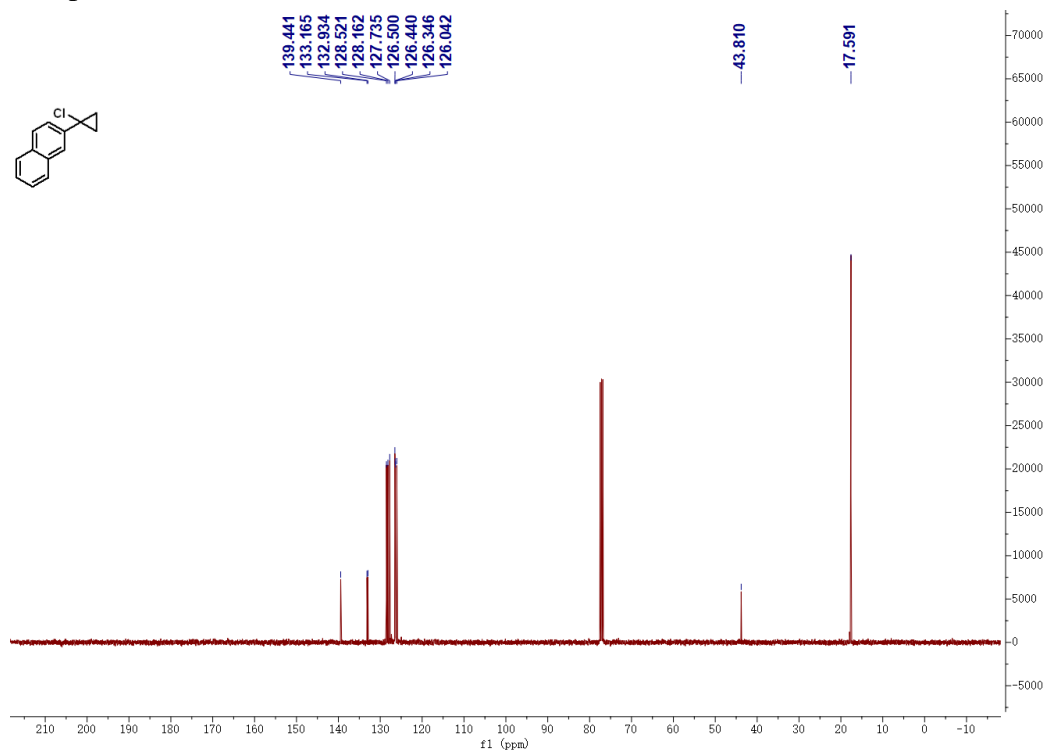

**<sup>1</sup>H NMR-spectrum (400 MHz, CDCl<sub>3</sub>) of 2g**

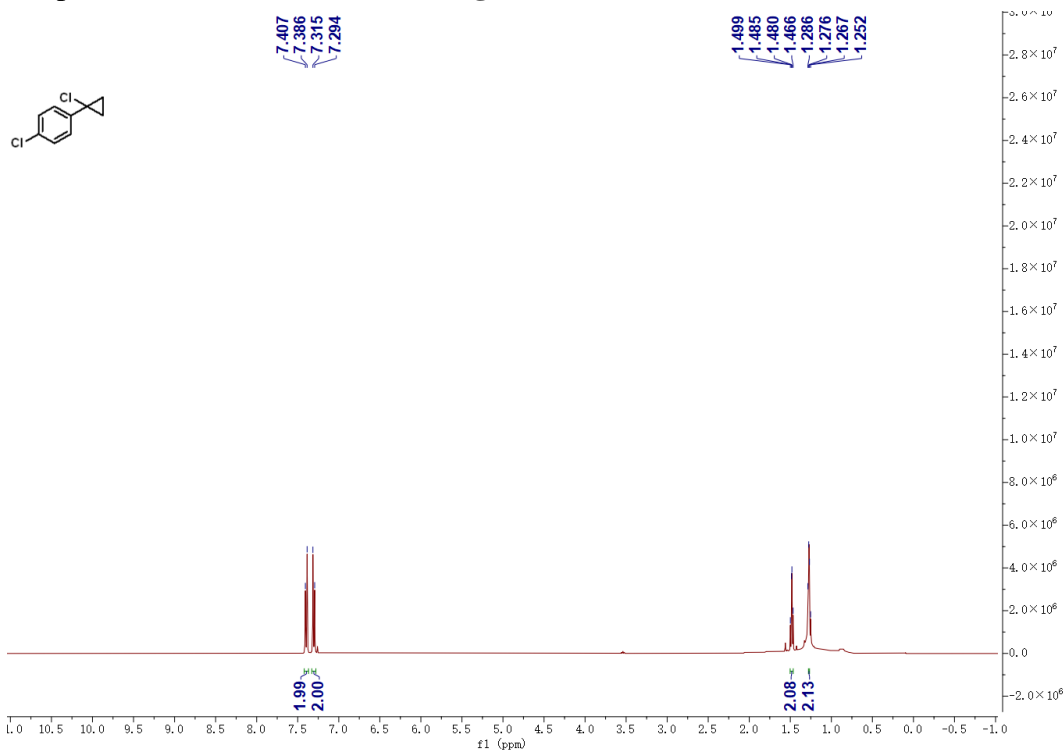

**<sup>13</sup>C NMR-spectrum (100 MHz, CDCl<sub>3</sub>) of 2g**

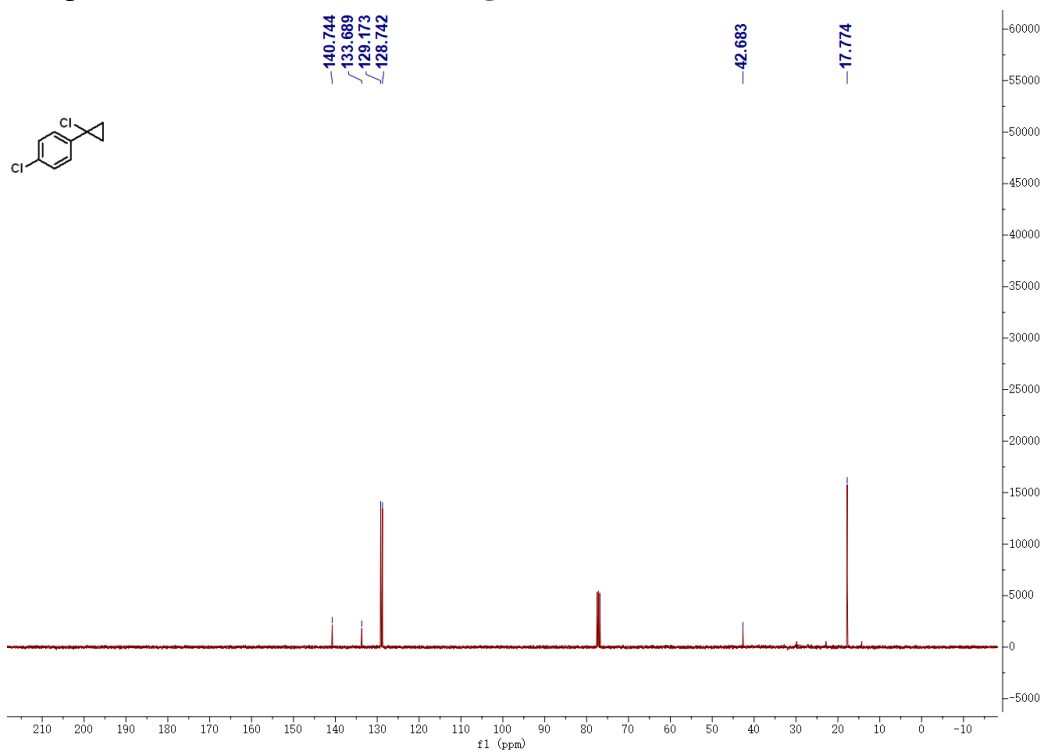

**<sup>1</sup>H NMR-spectrum (400 MHz, CDCl<sub>3</sub>) of 2h**

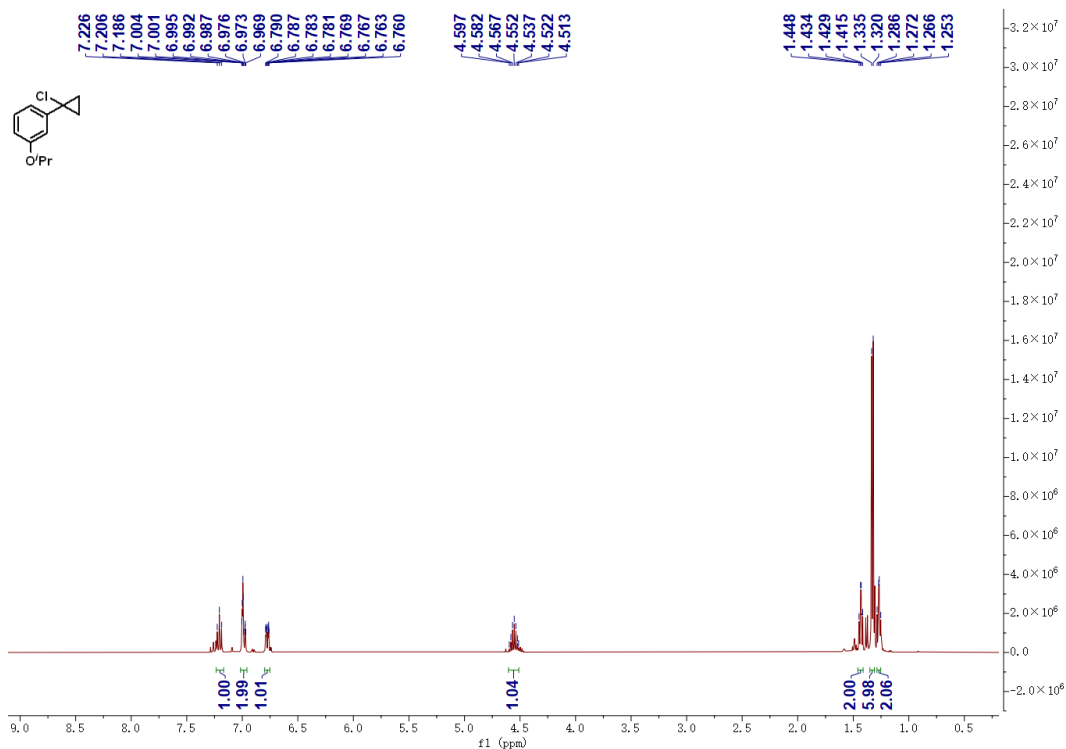

**<sup>13</sup>C NMR-spectrum (100 MHz, CDCl<sub>3</sub>) of 2h**

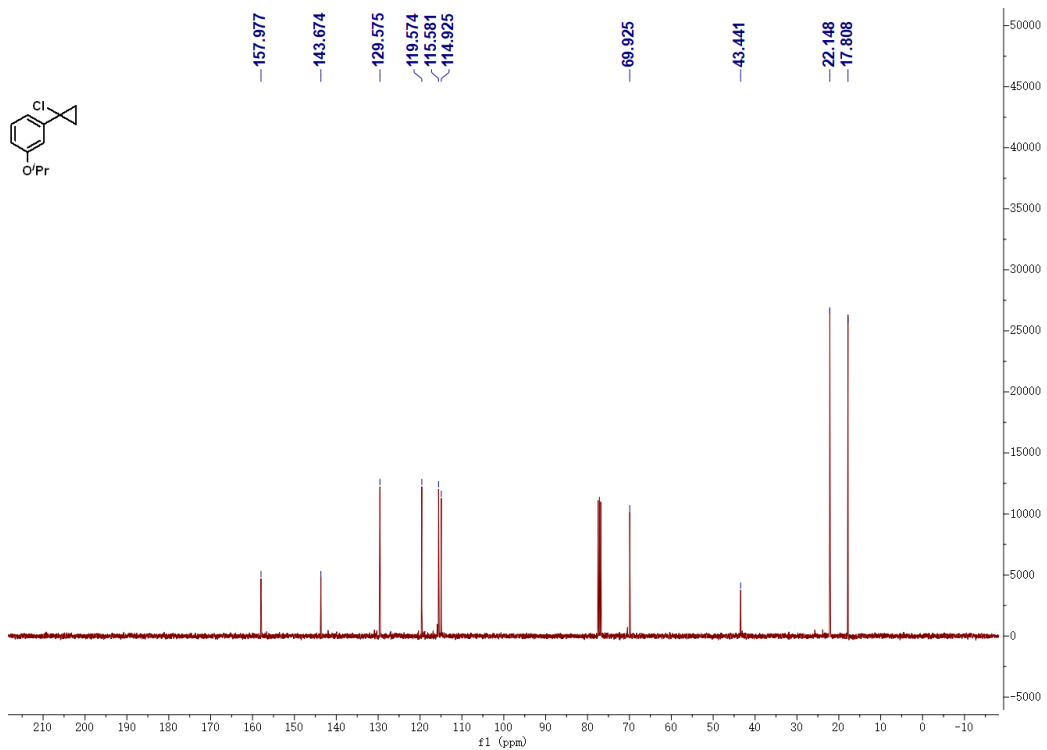

**<sup>1</sup>H NMR-spectrum (400 MHz, CDCl<sub>3</sub>) of 2i**

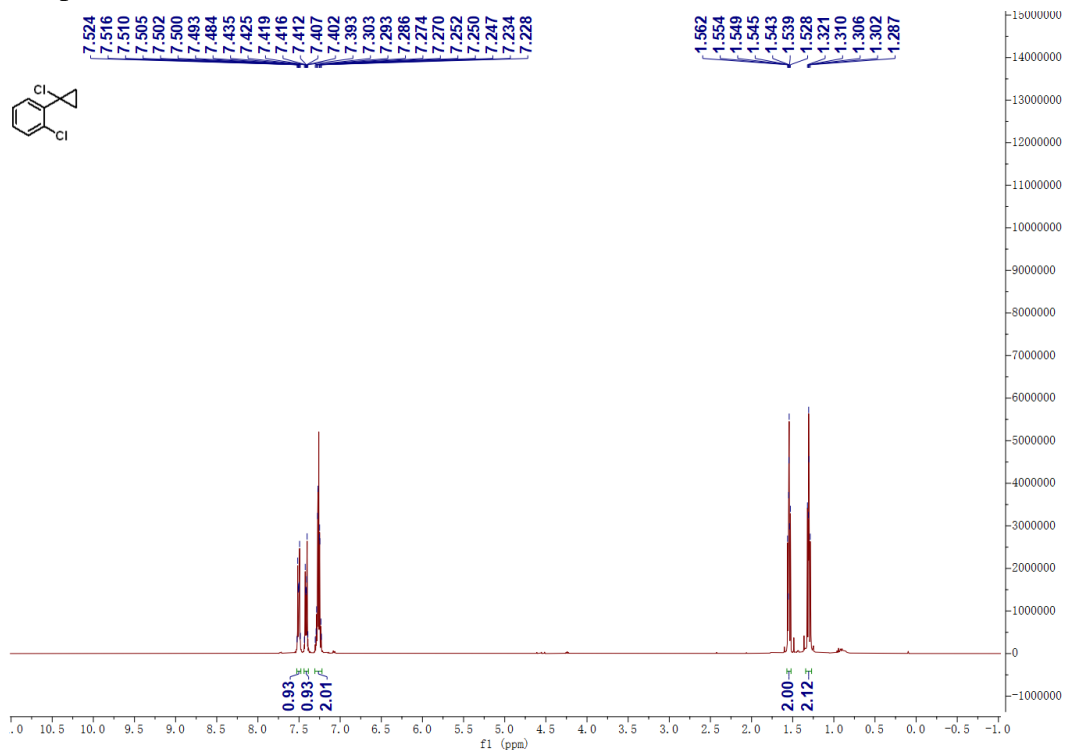

**<sup>13</sup>C NMR-spectrum (100 MHz, CDCl<sub>3</sub>) of 2i**

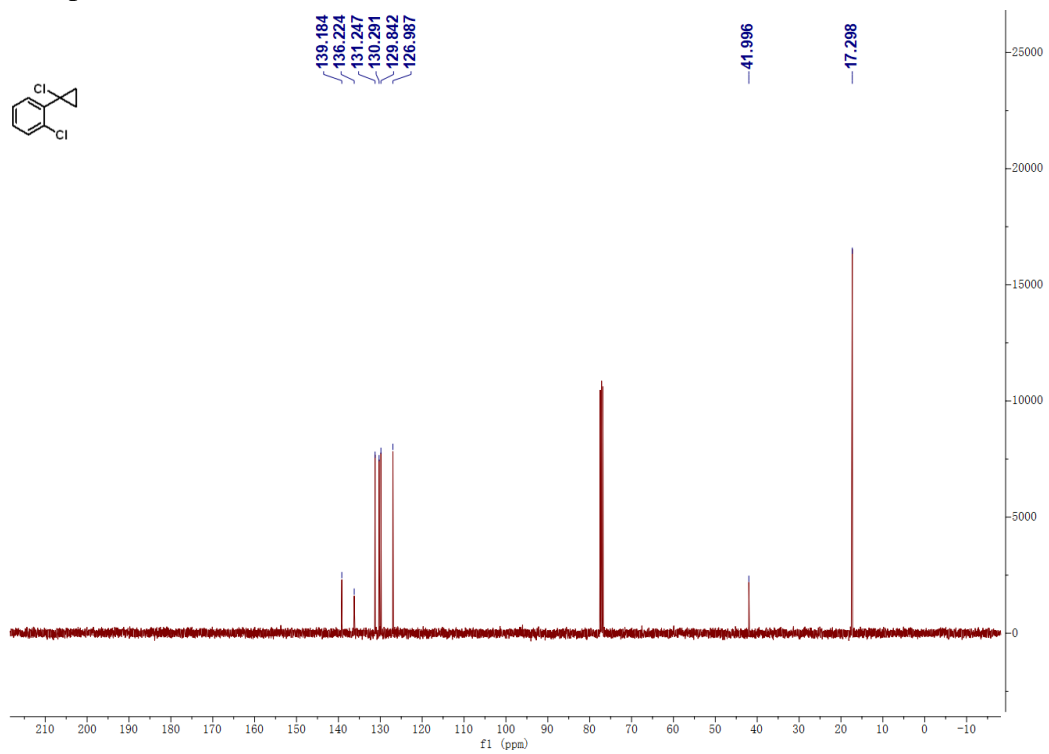

**<sup>1</sup>H NMR-spectrum (400 MHz, CDCl<sub>3</sub>) of 2g**

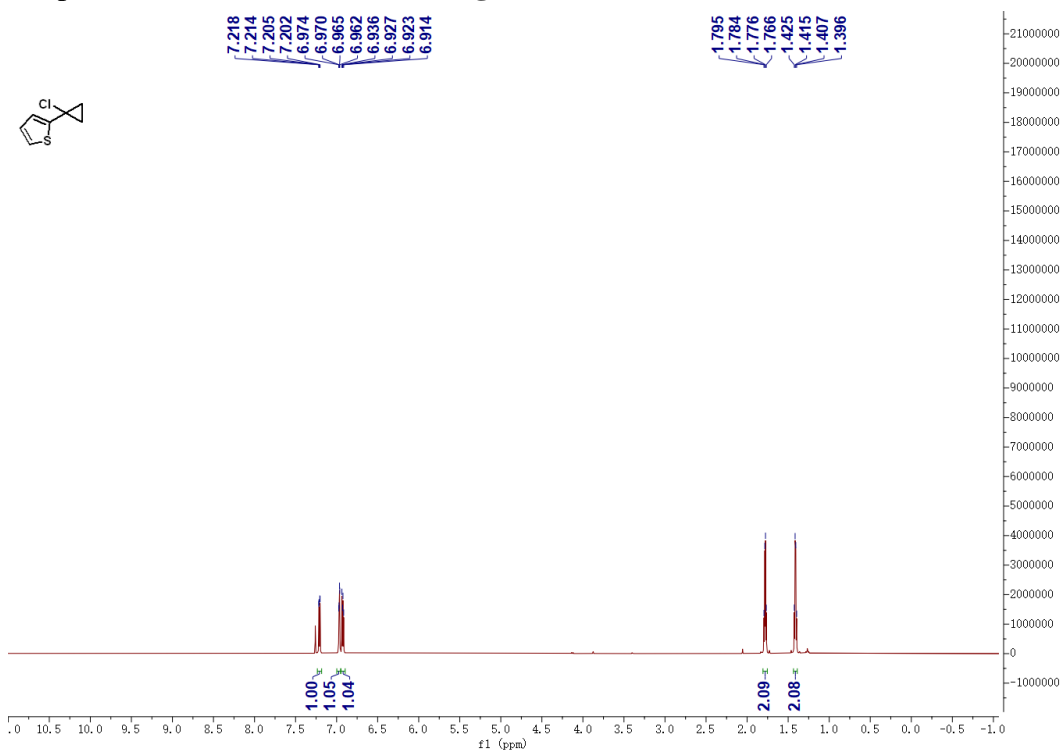

**<sup>13</sup>C NMR-spectrum (100 MHz, CDCl<sub>3</sub>) of 2g**

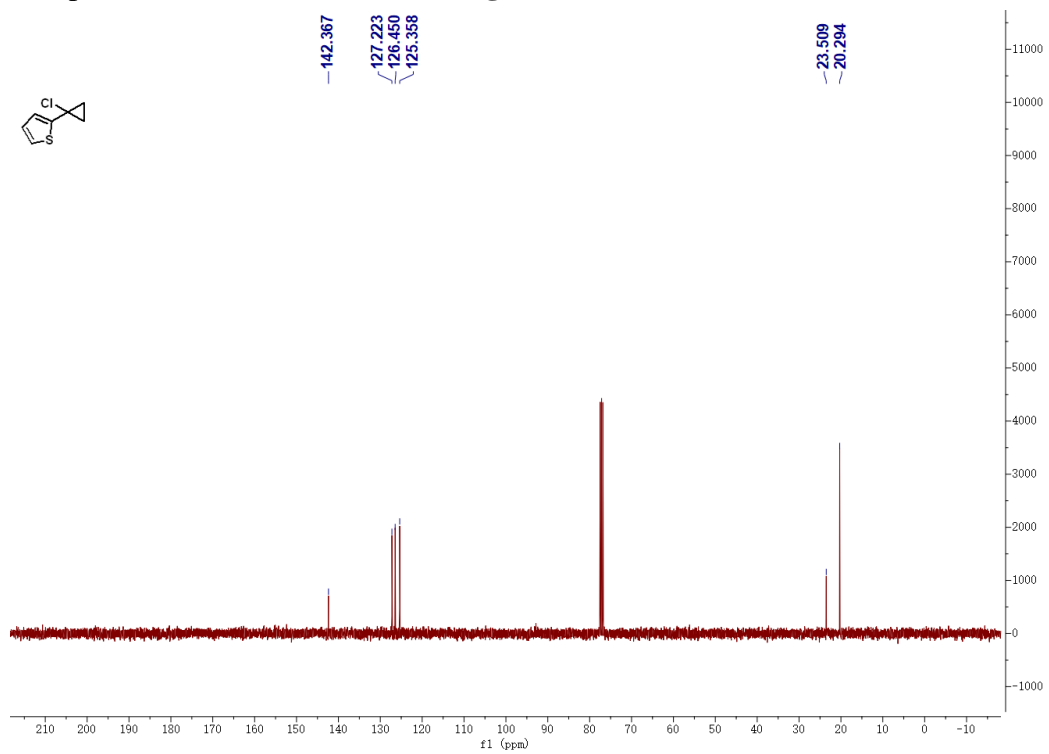

**<sup>1</sup>H NMR-spectrum (400 MHz, CDCl<sub>3</sub>) of 3a**

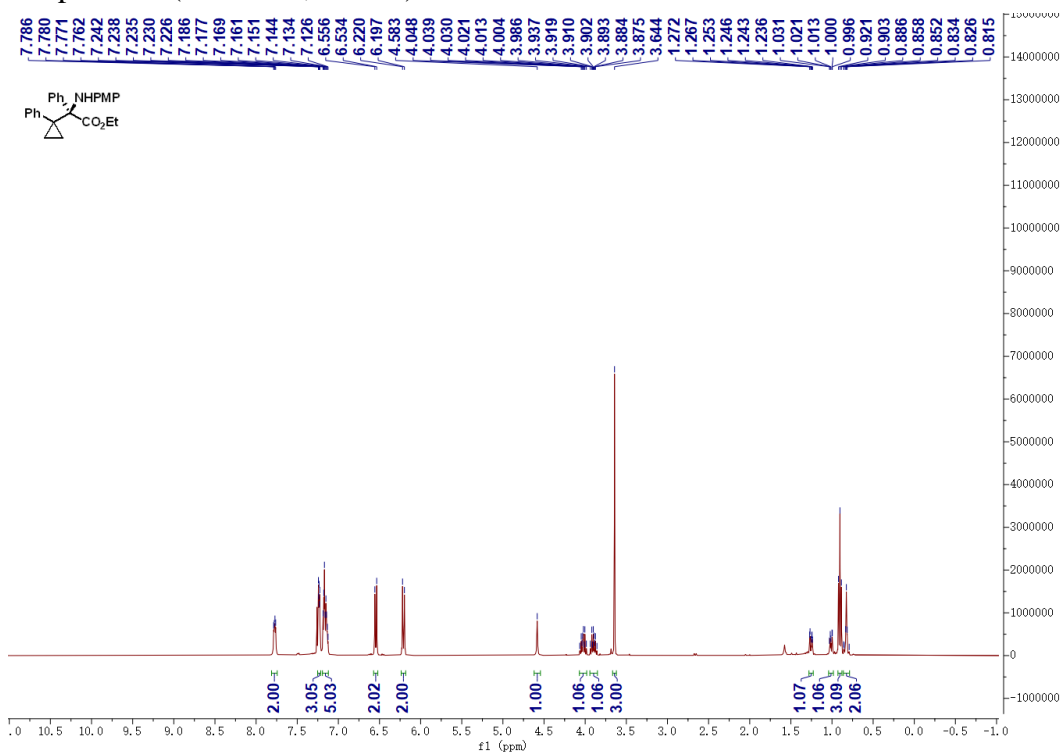

**<sup>13</sup>C NMR-spectrum (100 MHz, CDCl<sub>3</sub>) of 3a**

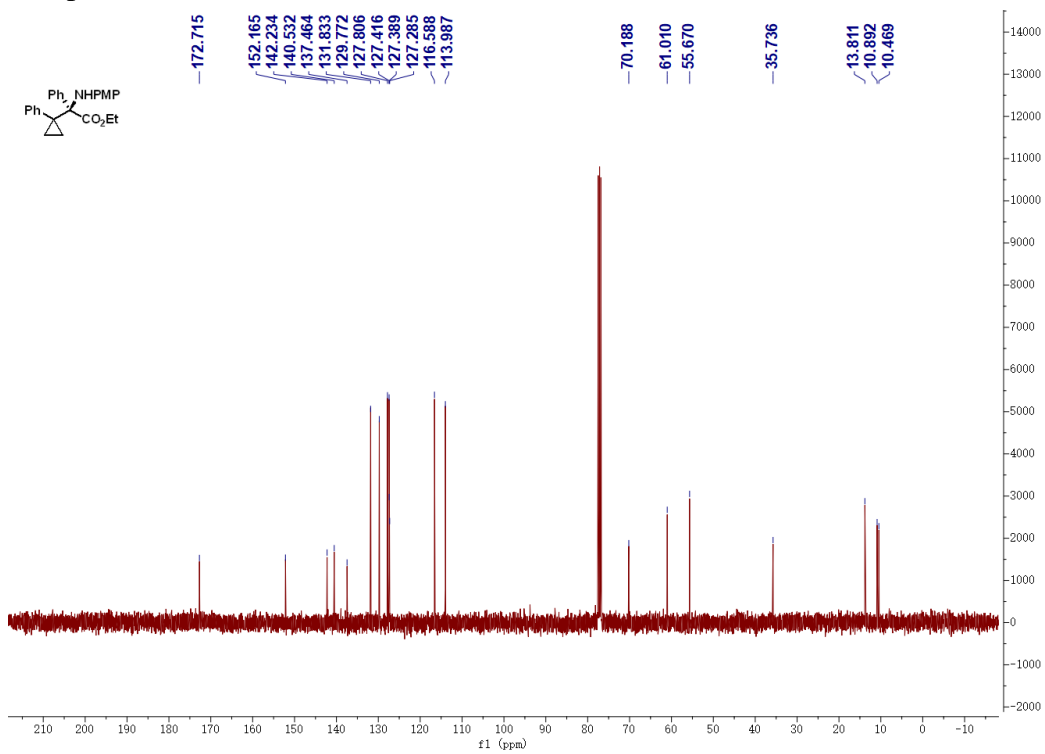

**<sup>1</sup>H NMR-spectrum (400 MHz, CDCl<sub>3</sub>) of 3b**

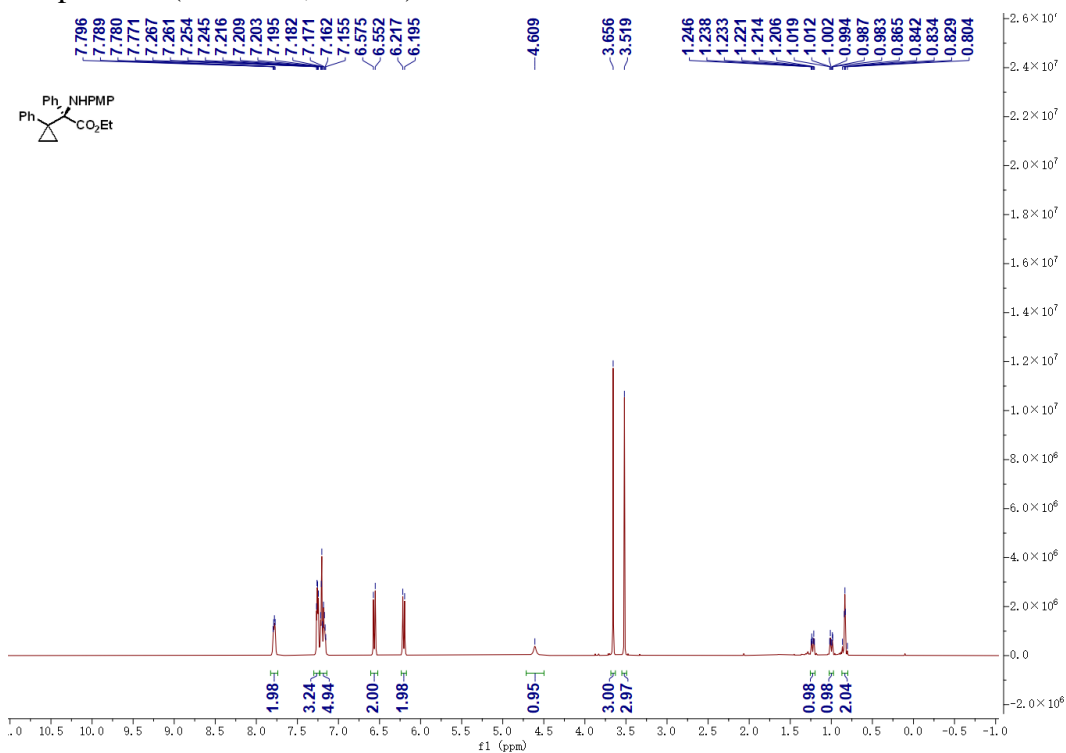

**<sup>13</sup>C NMR-spectrum (100 MHz, CDCl<sub>3</sub>) of 3b**

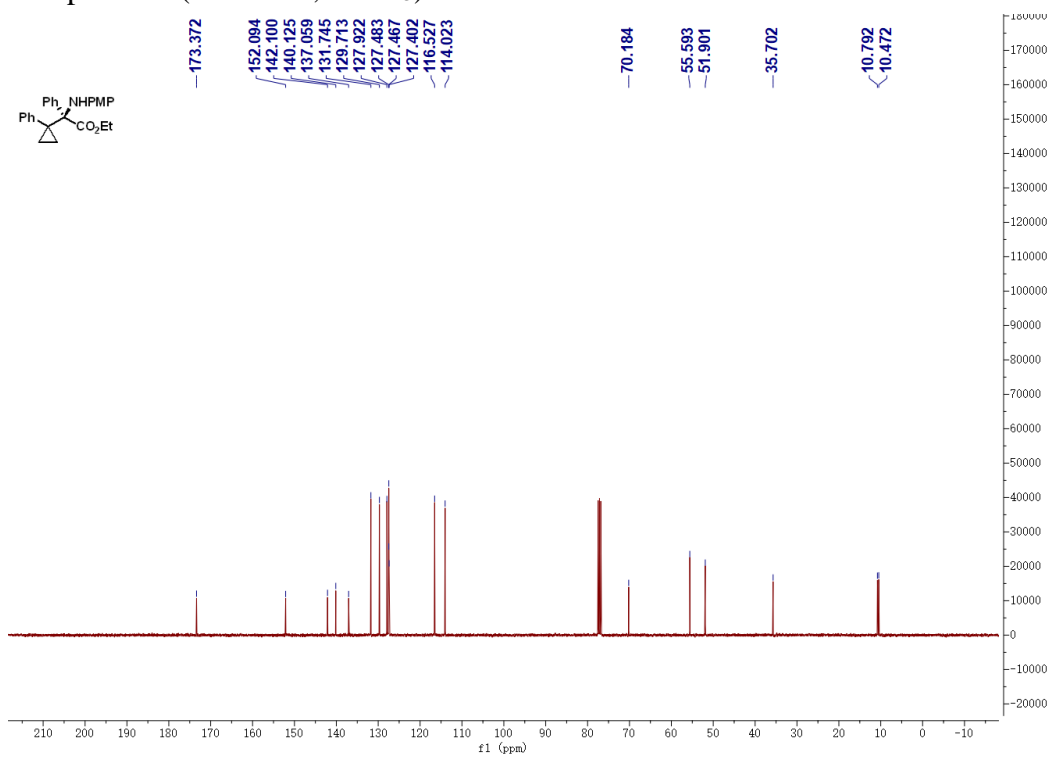

**<sup>1</sup>H NMR-spectrum (400 MHz, CDCl<sub>3</sub>) of 3c**

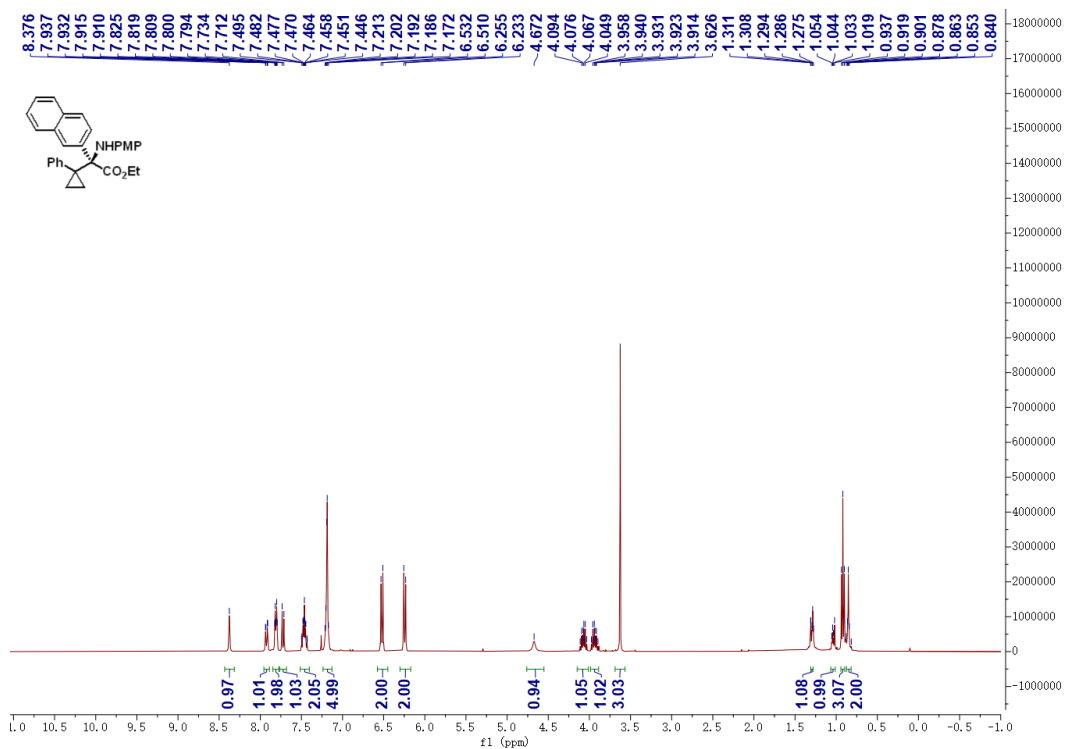

**<sup>13</sup>C NMR-spectrum (100 MHz, CDCl<sub>3</sub>) of 3c**

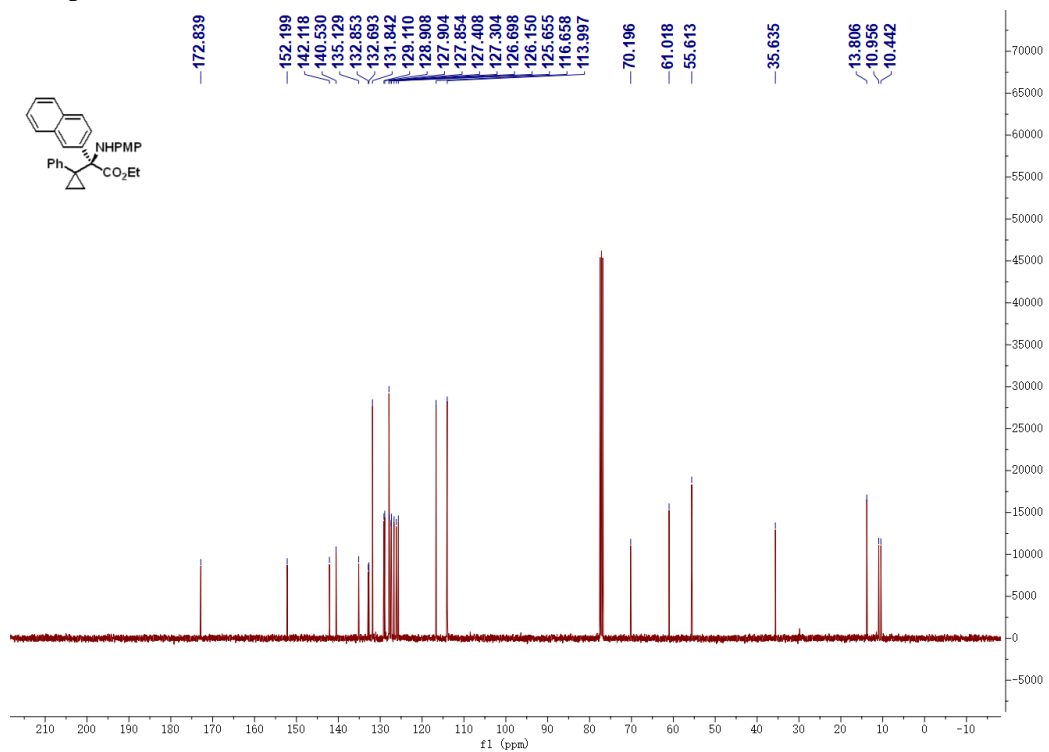



**<sup>1</sup>H NMR-spectrum (400 MHz, CDCl<sub>3</sub>) of 3d**

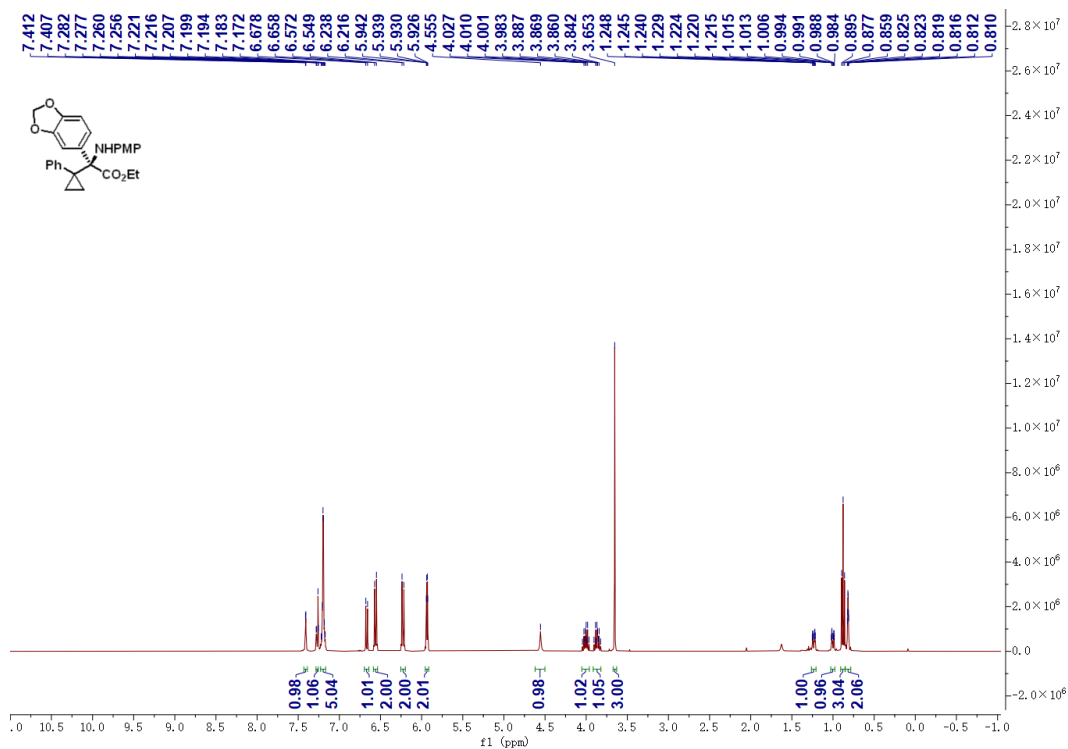

**<sup>13</sup>C NMR-spectrum (100 MHz, CDCl<sub>3</sub>) of 3d**

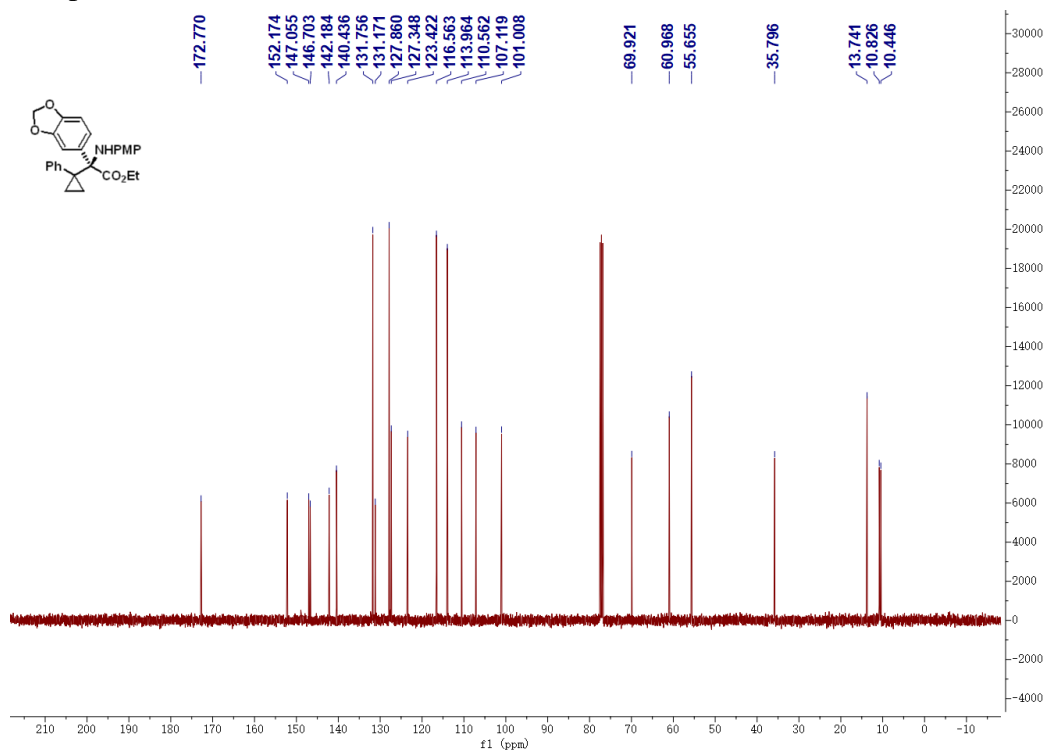

**<sup>1</sup>H NMR-spectrum (400 MHz, CDCl<sub>3</sub>) of 3e**

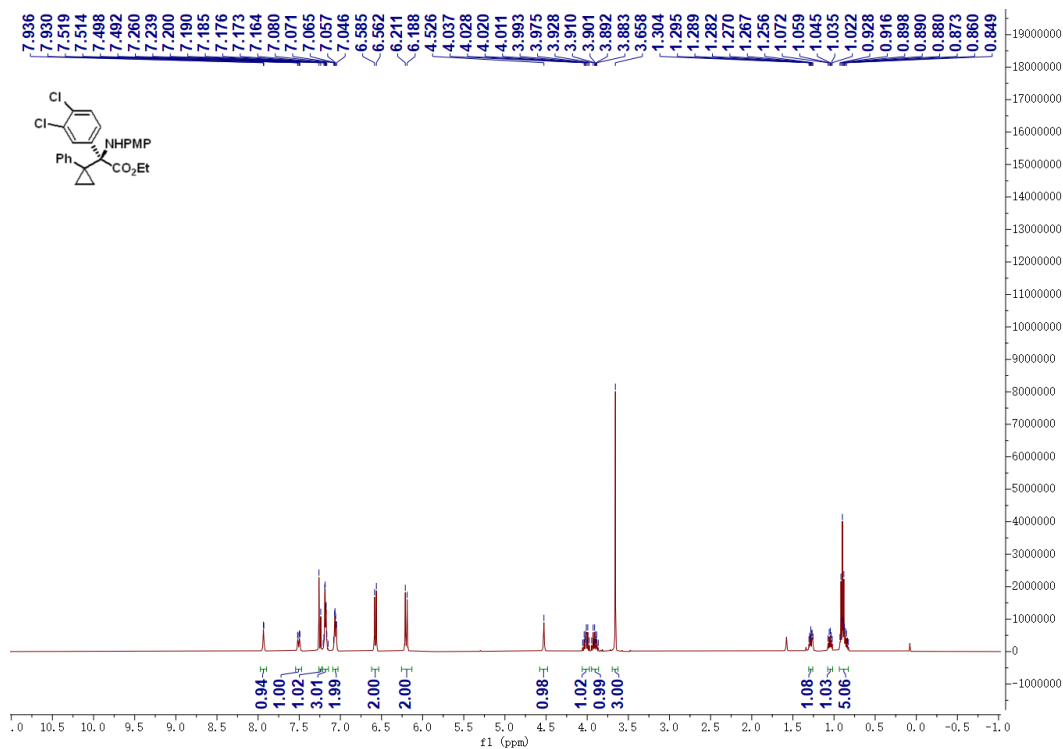

**<sup>13</sup>C NMR-spectrum (100 MHz, CDCl<sub>3</sub>) of 3e**

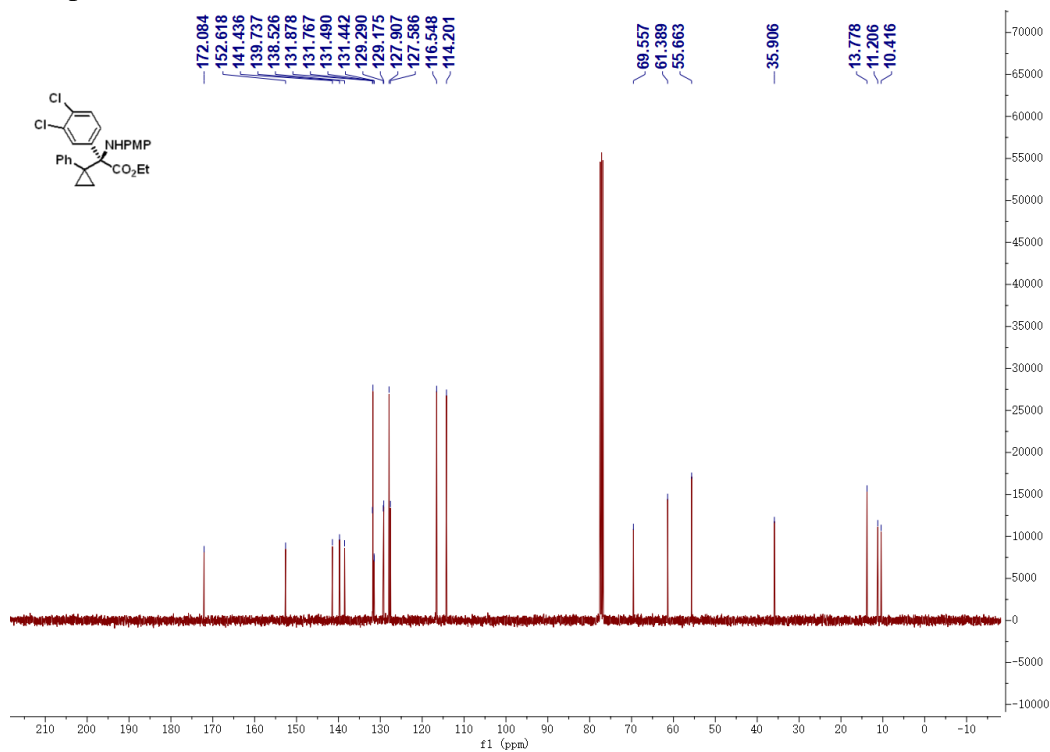

**<sup>1</sup>H NMR-spectrum (400 MHz, CDCl<sub>3</sub>) of 3f**

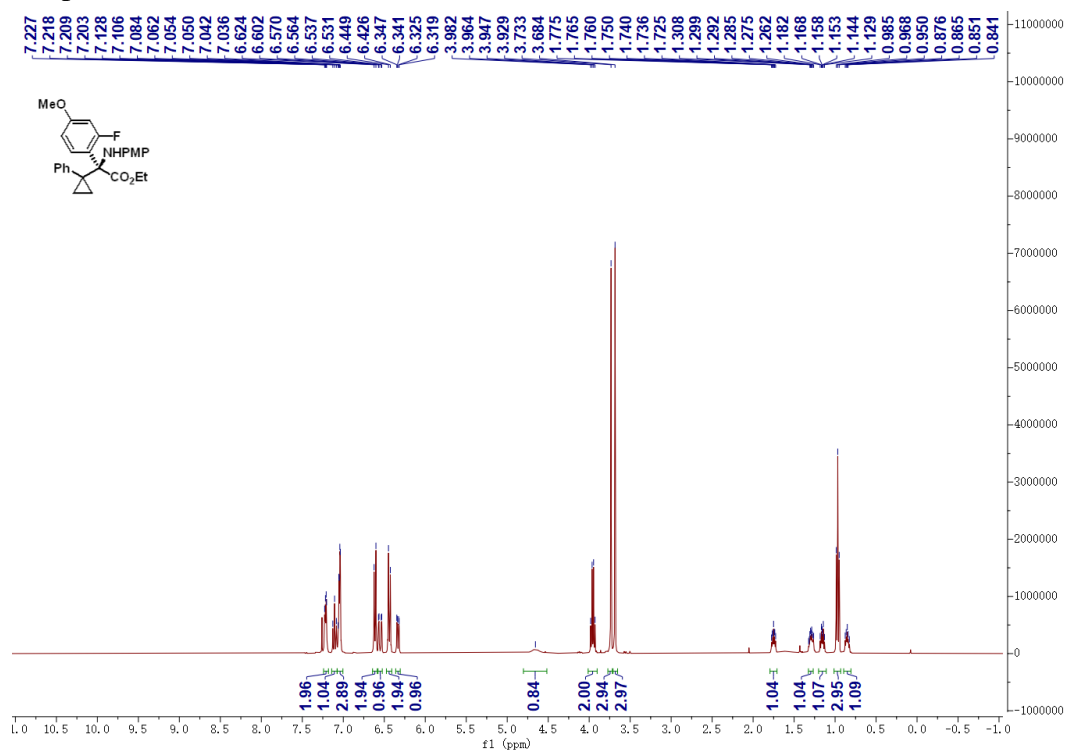

**<sup>13</sup>C NMR-spectrum (100 MHz, CDCl<sub>3</sub>) of 3f**

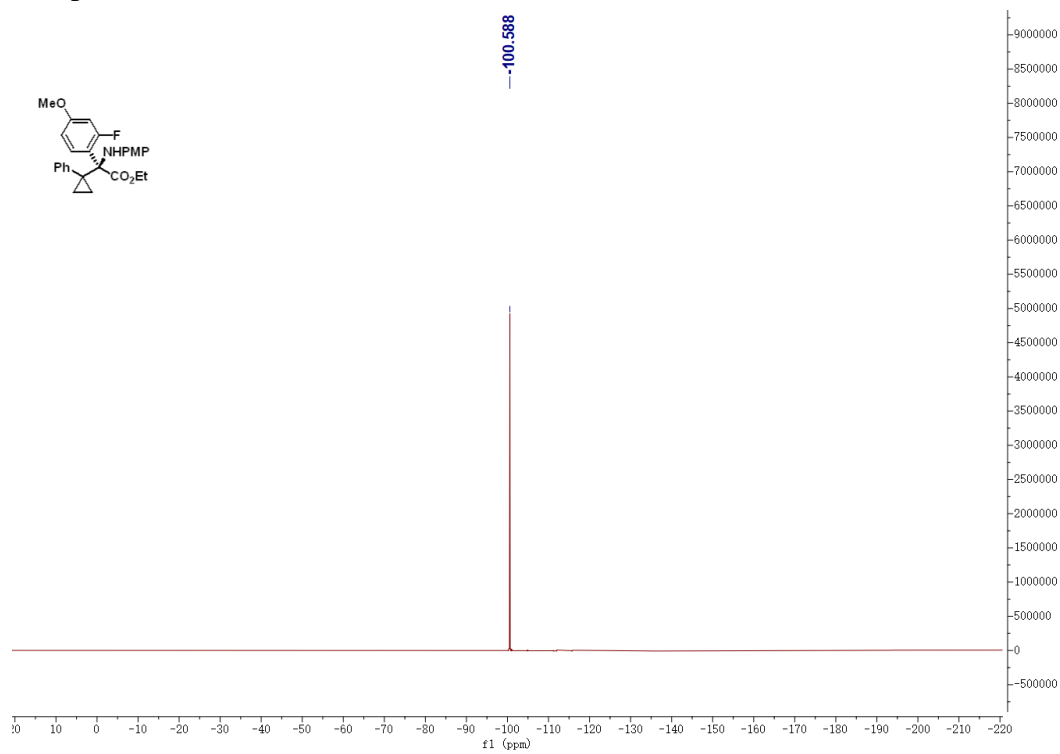

<sup>19</sup>F NMR-spectrum (376 MHz, CDCl<sub>3</sub>) of **3a**

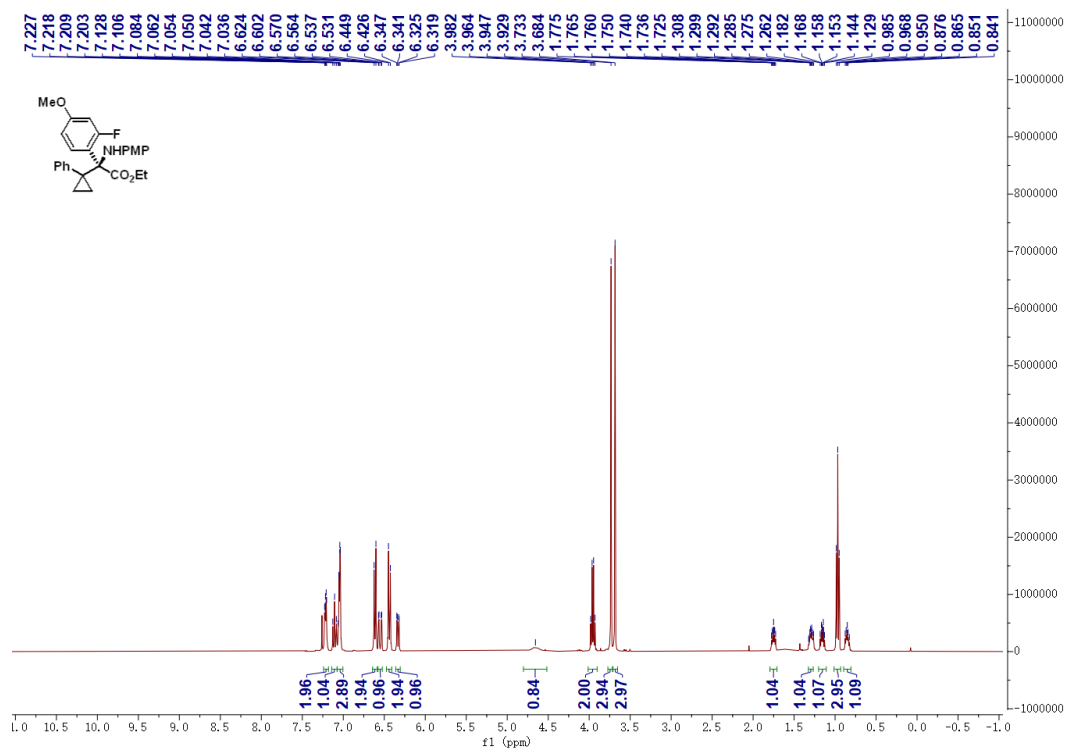

<sup>1</sup>H NMR-spectrum (400 MHz, CDCl<sub>3</sub>) of **3g**

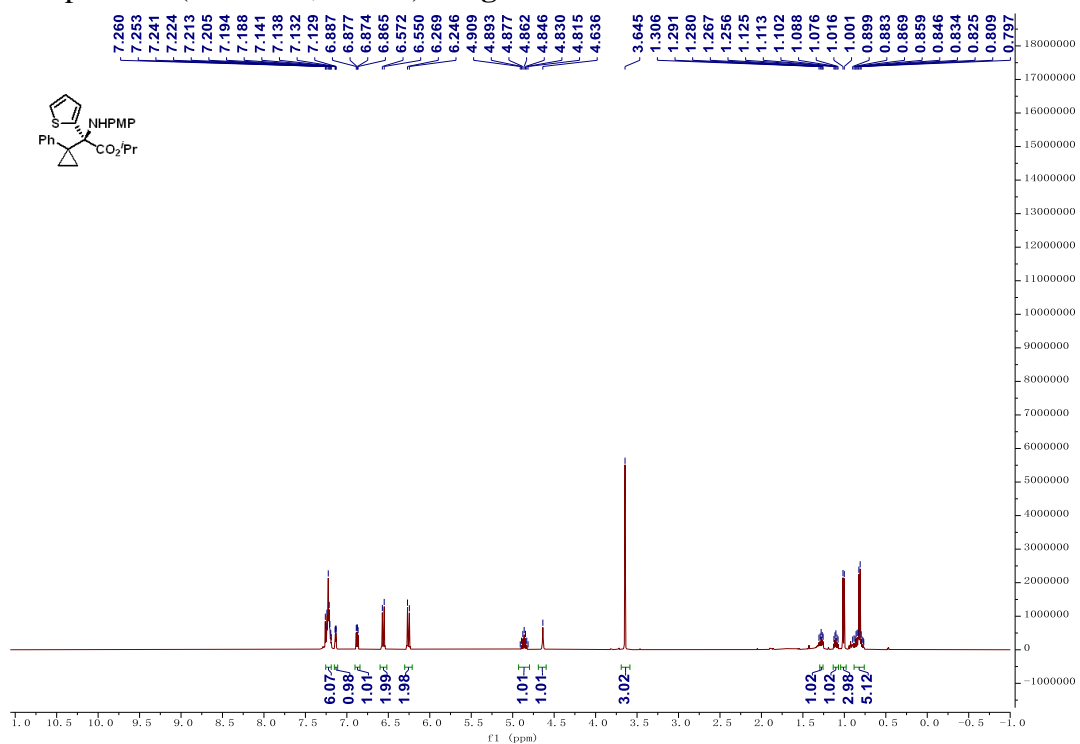

<sup>13</sup>C NMR-spectrum (100 MHz, CDCl<sub>3</sub>) of **3g**

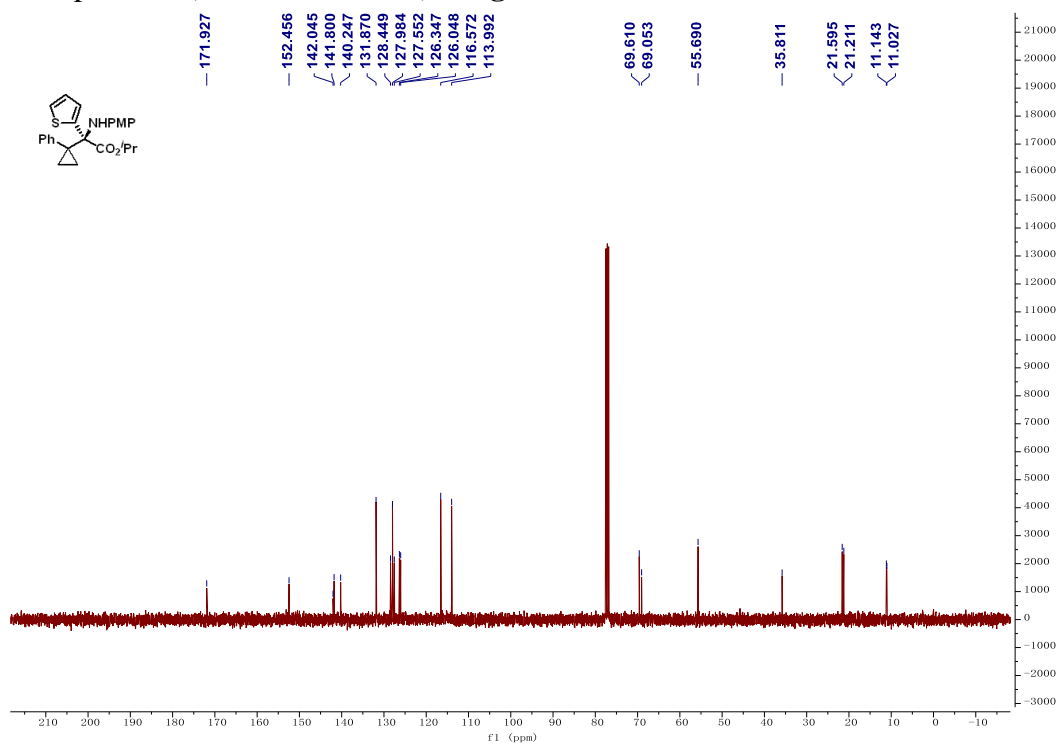

<sup>1</sup>H NMR-spectrum (400 MHz, CDCl<sub>3</sub>) of **3h**

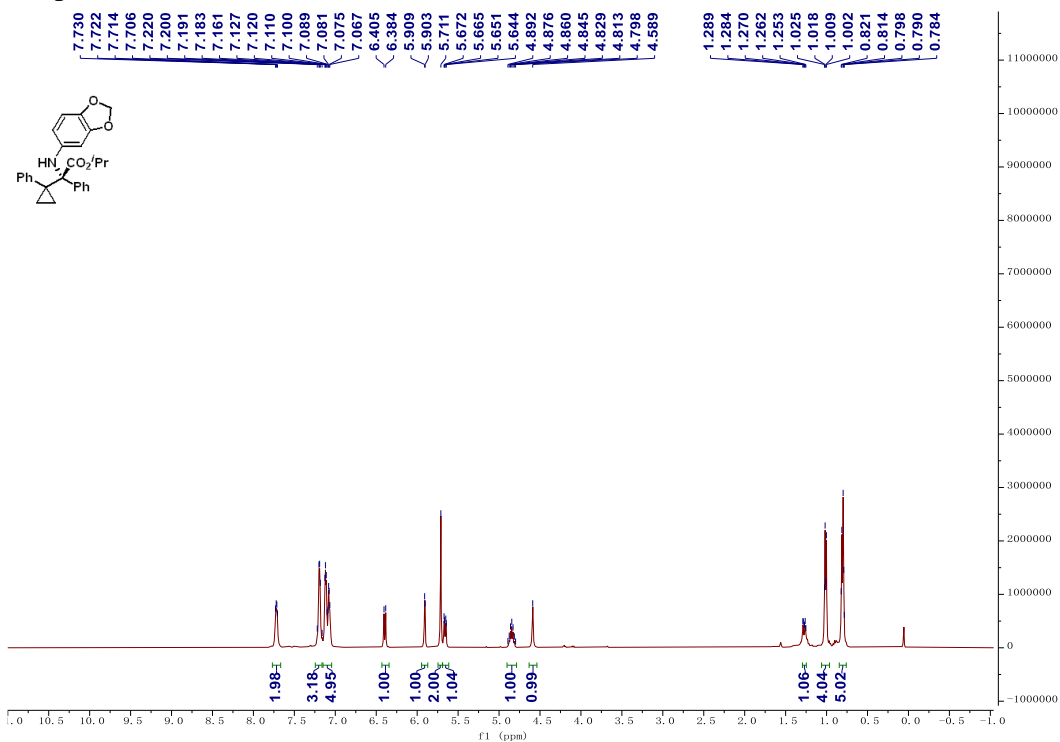

<sup>13</sup>C NMR-spectrum (100 MHz, CDCl<sub>3</sub>) of **3h**

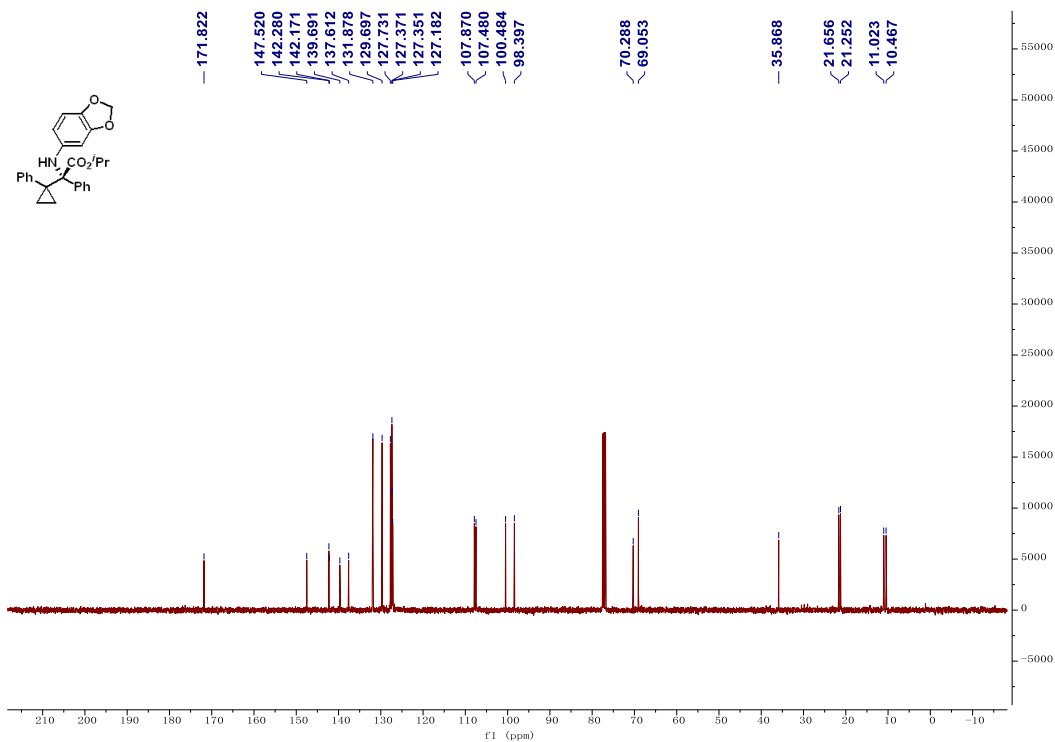

### <sup>1</sup>H NMR-spectrum (400 MHz, CDCl<sub>3</sub>) of **3i**

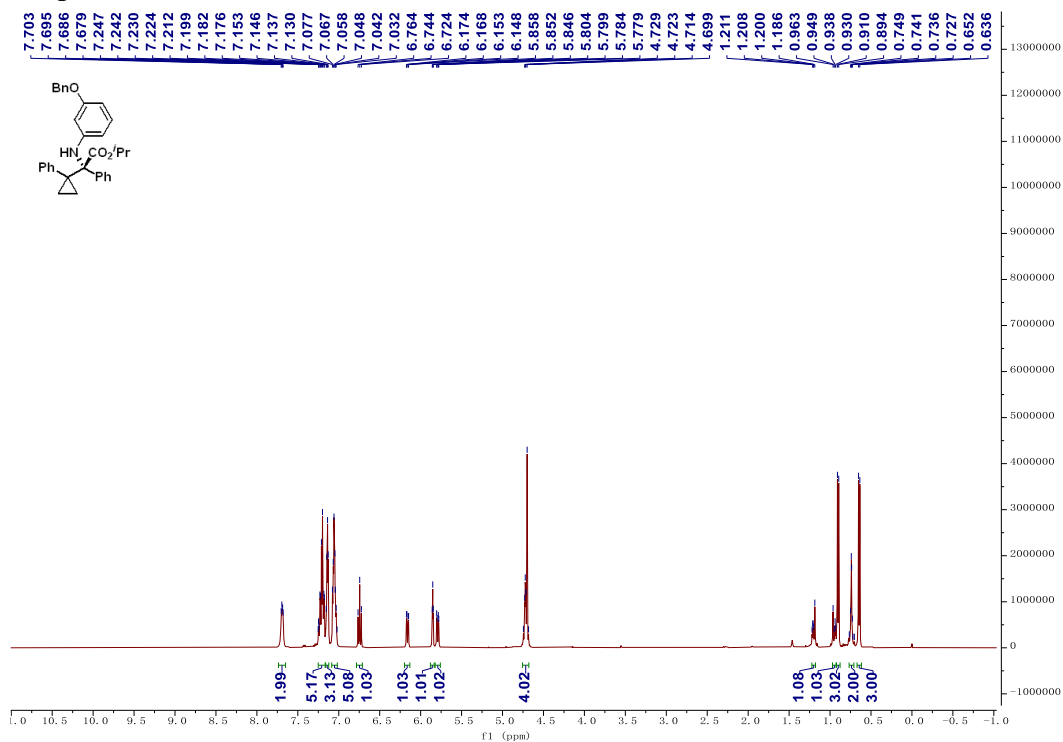

### <sup>13</sup>C NMR-spectrum (100 MHz, CDCl<sub>3</sub>) of **3i**

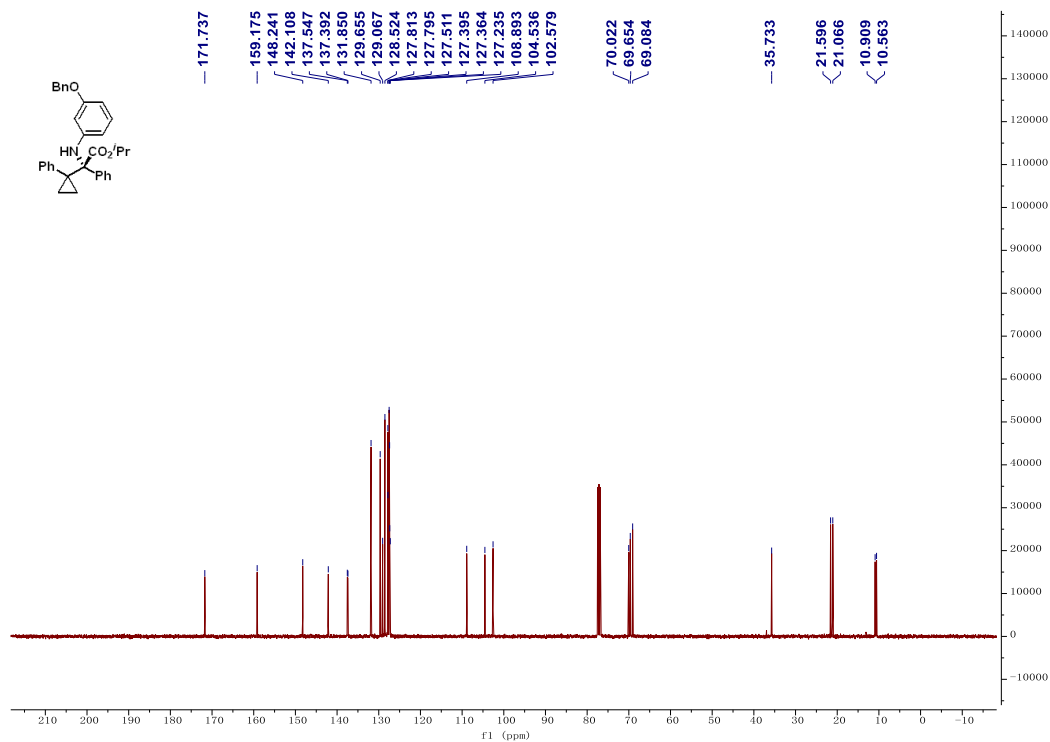

### <sup>1</sup>H NMR-spectrum (400 MHz, CDCl<sub>3</sub>) of **3j**

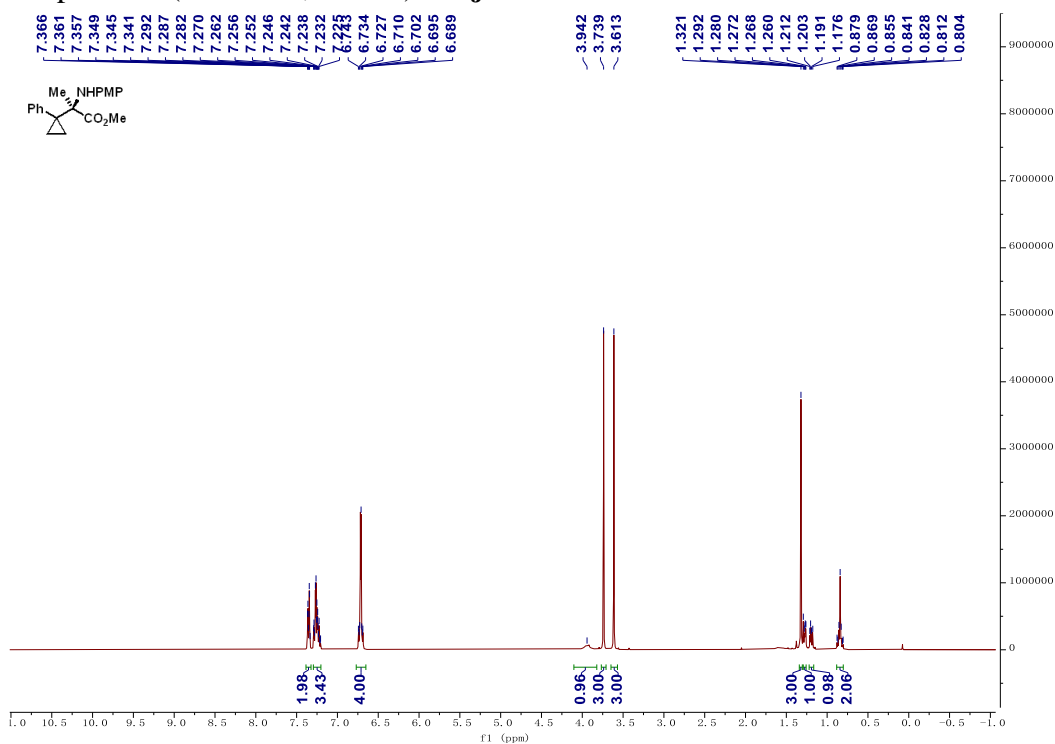

### <sup>13</sup>C NMR-spectrum (100 MHz, CDCl<sub>3</sub>) of **3j**

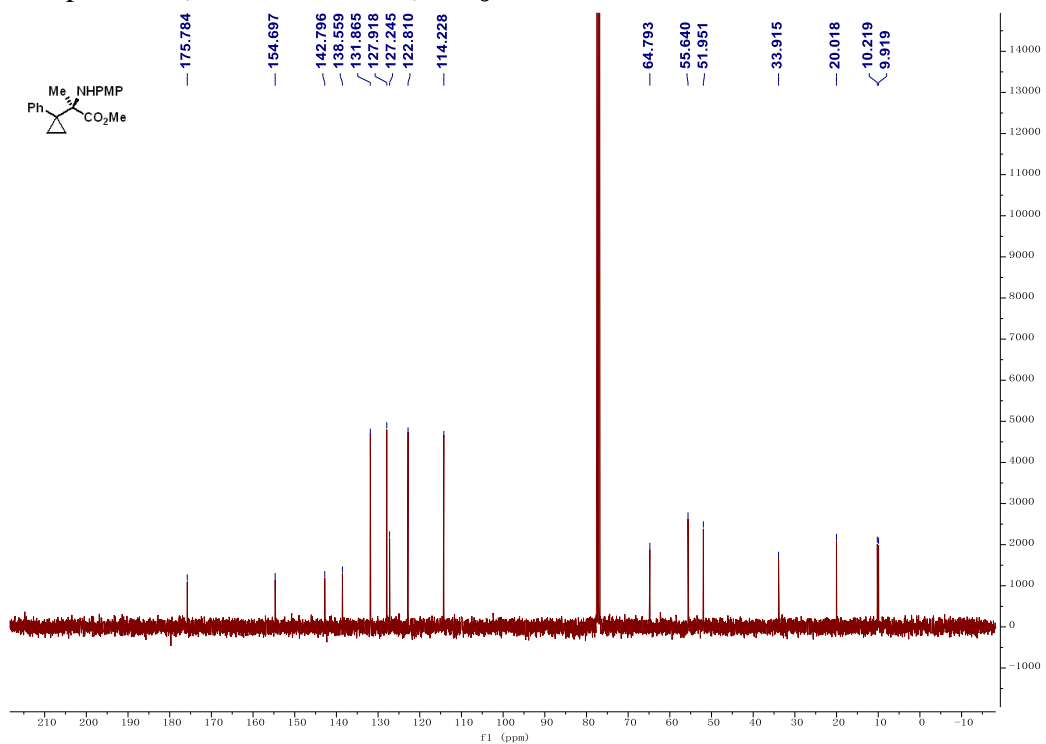



<sup>1</sup>H NMR-spectrum (400 MHz, CDCl<sub>3</sub>) of **3k**

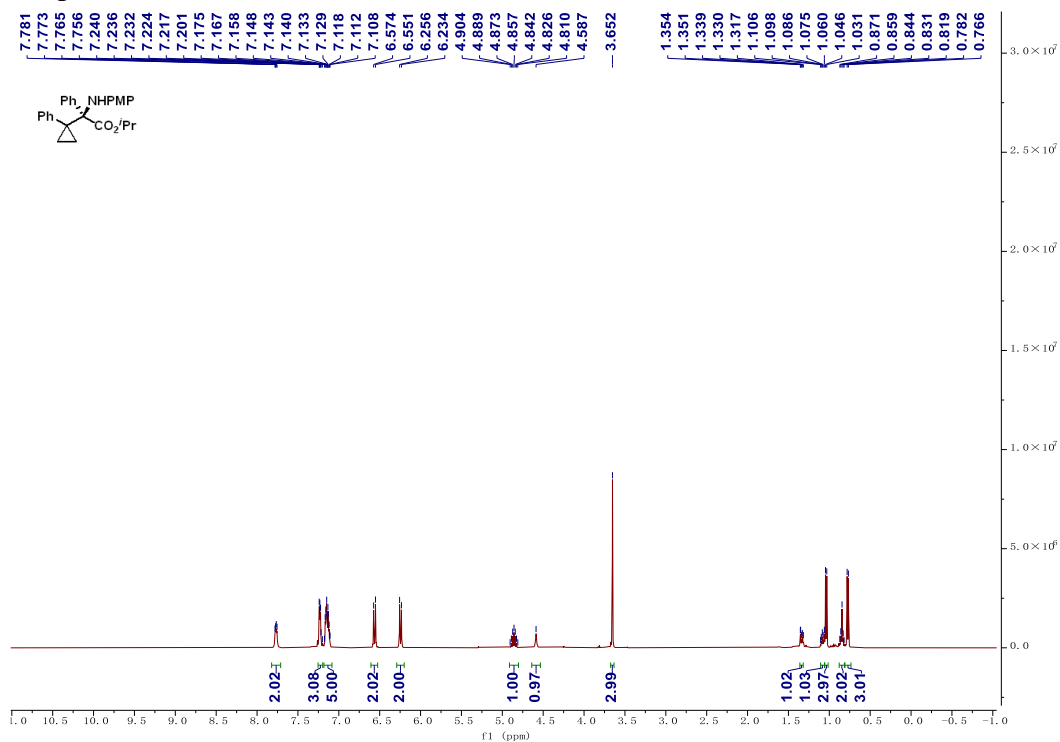

<sup>13</sup>C NMR-spectrum (100 MHz, CDCl<sub>3</sub>) of **3k**

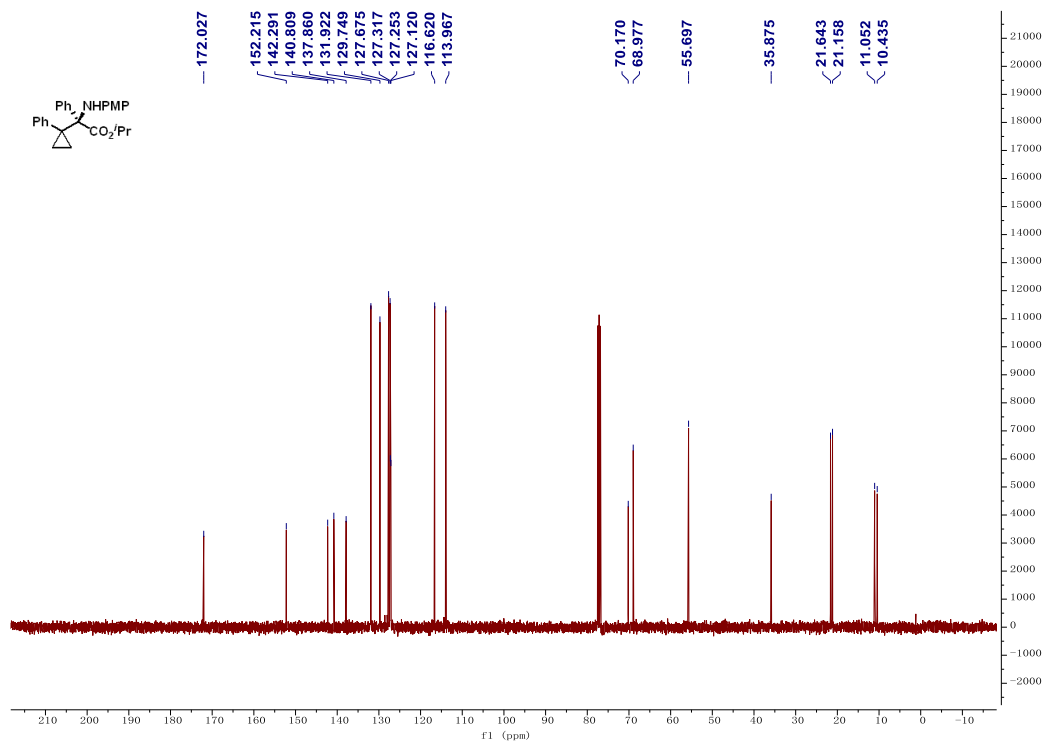

### $^1\text{H}$ NMR-spectrum (400 MHz, $\text{CDCl}_3$ ) of **31**

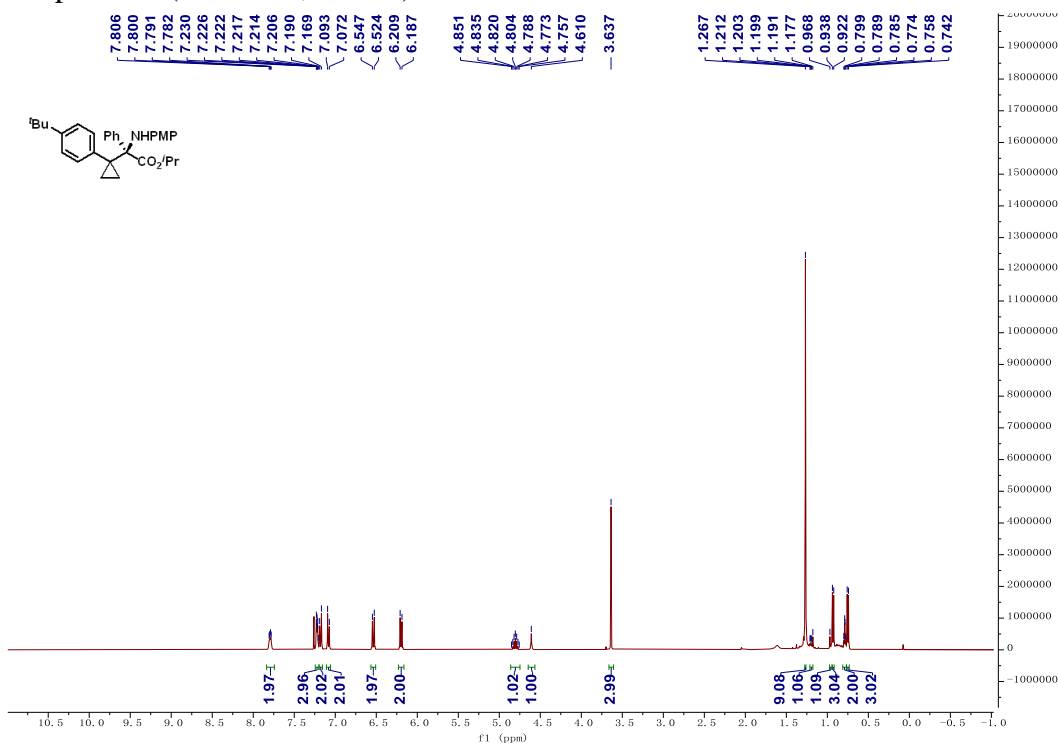

### $^{13}\text{C}$ NMR-spectrum (100 MHz, $\text{CDCl}_3$ ) of **31**

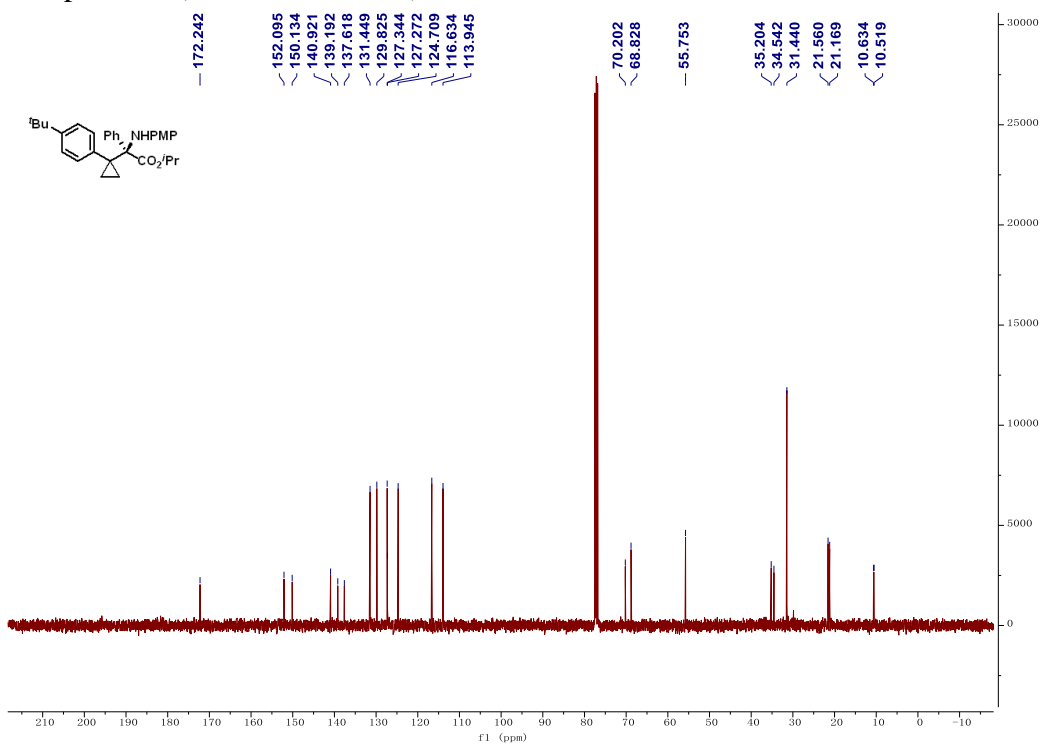

<sup>1</sup>H NMR-spectrum (400 MHz, CDCl<sub>3</sub>) of **3m**

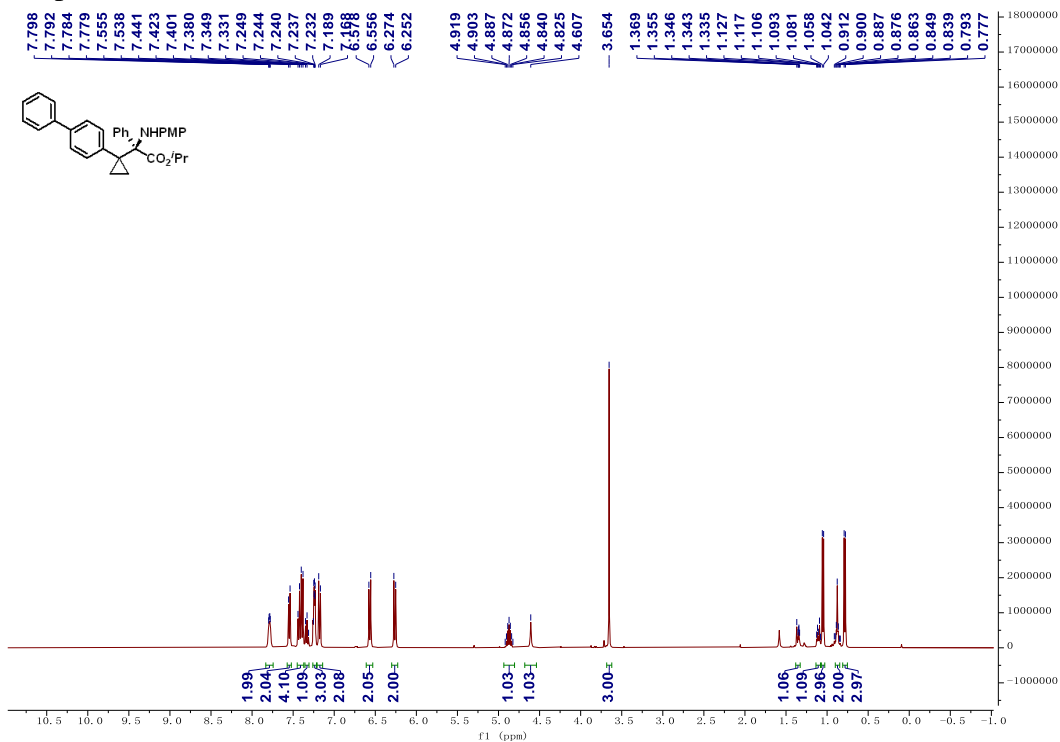

<sup>13</sup>C NMR-spectrum (100 MHz, CDCl<sub>3</sub>) of **3m**

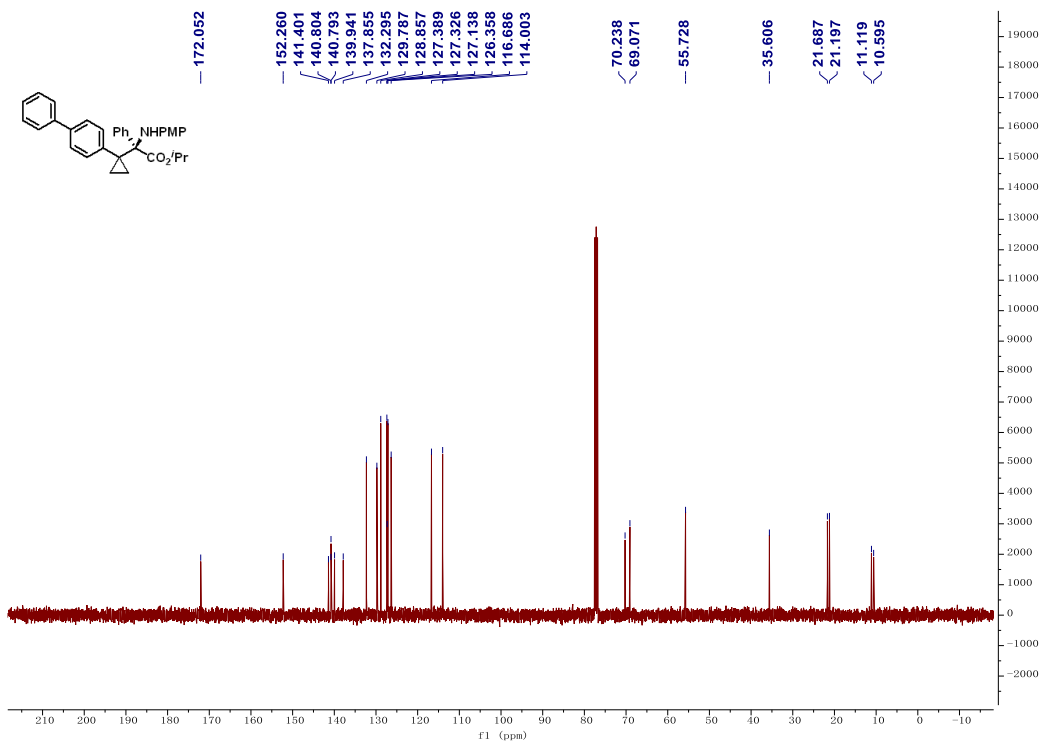

### <sup>1</sup>H NMR-spectrum (400 MHz, CDCl<sub>3</sub>) of **3n**

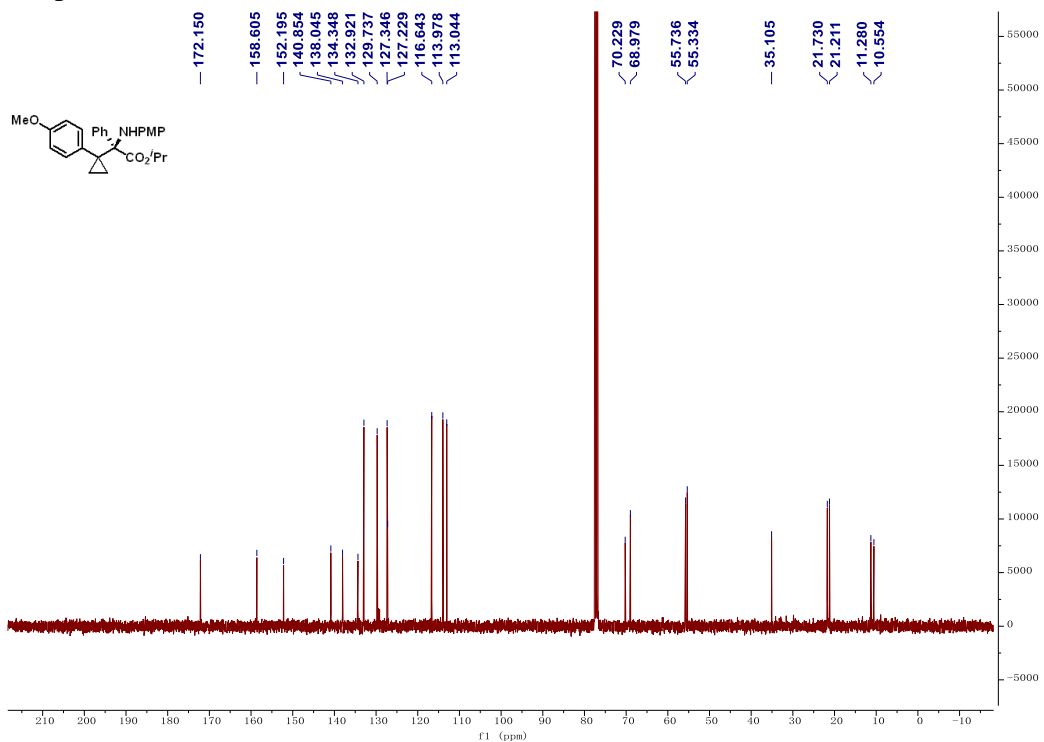

### <sup>13</sup>C NMR-spectrum (100 MHz, CDCl<sub>3</sub>) of **3n**

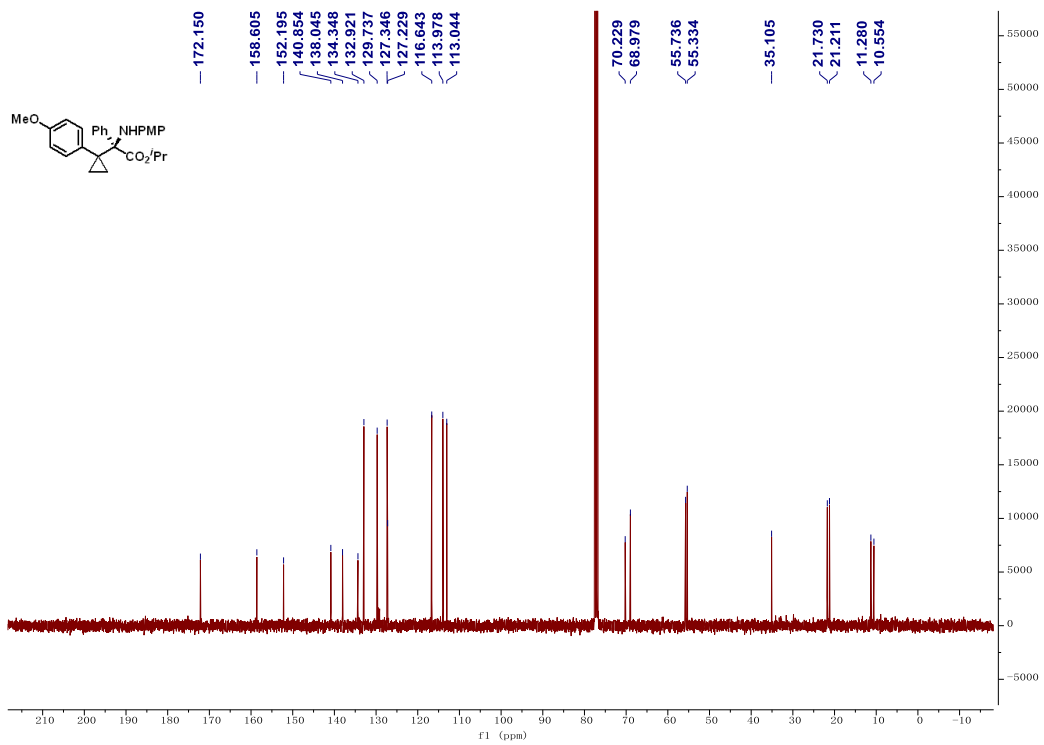

<sup>1</sup>H NMR-spectrum (400 MHz, CDCl<sub>3</sub>) of **3o**

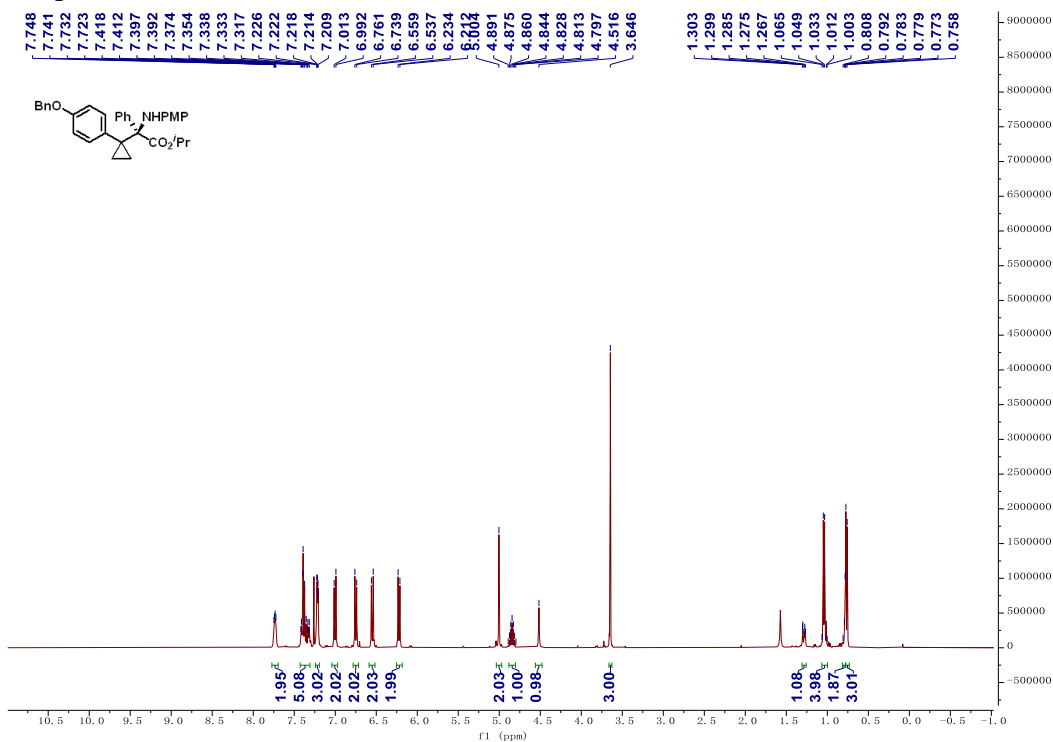

<sup>13</sup>C NMR-spectrum (100 MHz, CDCl<sub>3</sub>) of **3o**

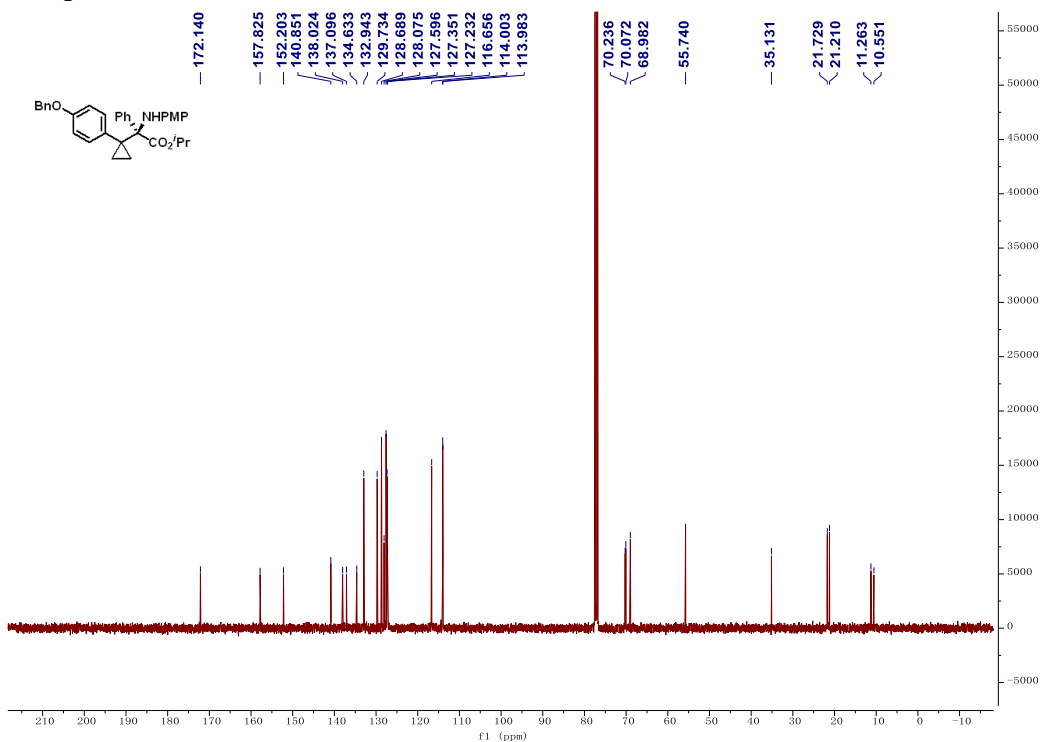

**<sup>1</sup>H NMR-spectrum (400 MHz, CDCl<sub>3</sub>) of 3p**

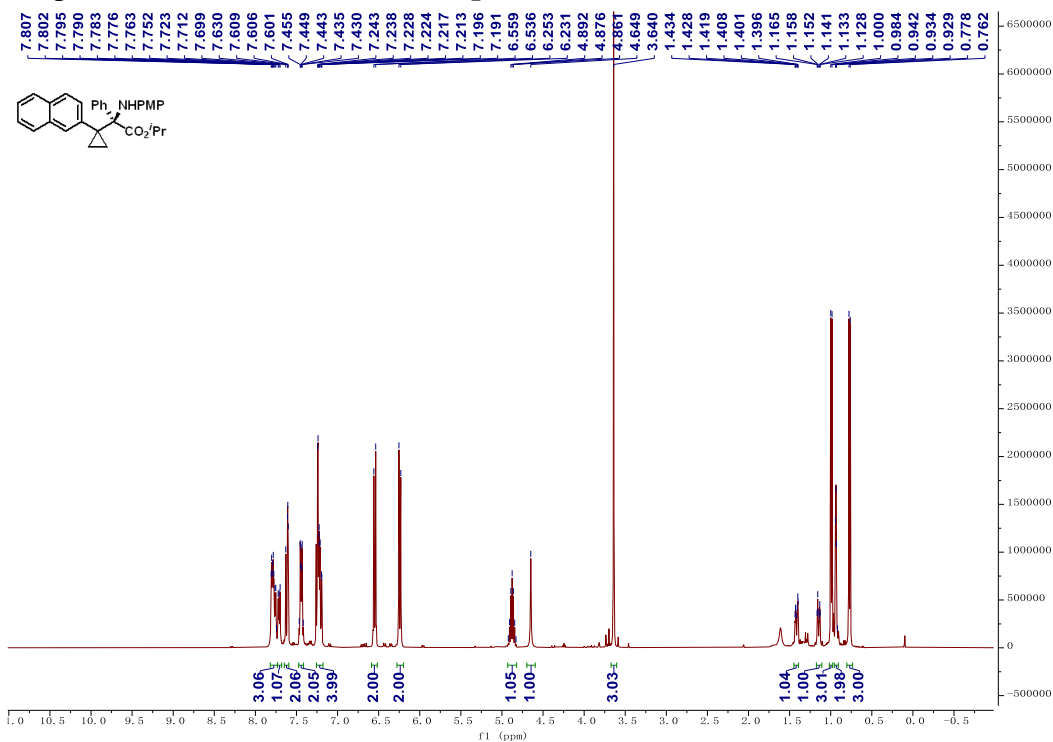

**<sup>13</sup>C NMR-spectrum (100 MHz, CDCl<sub>3</sub>) of 3p**

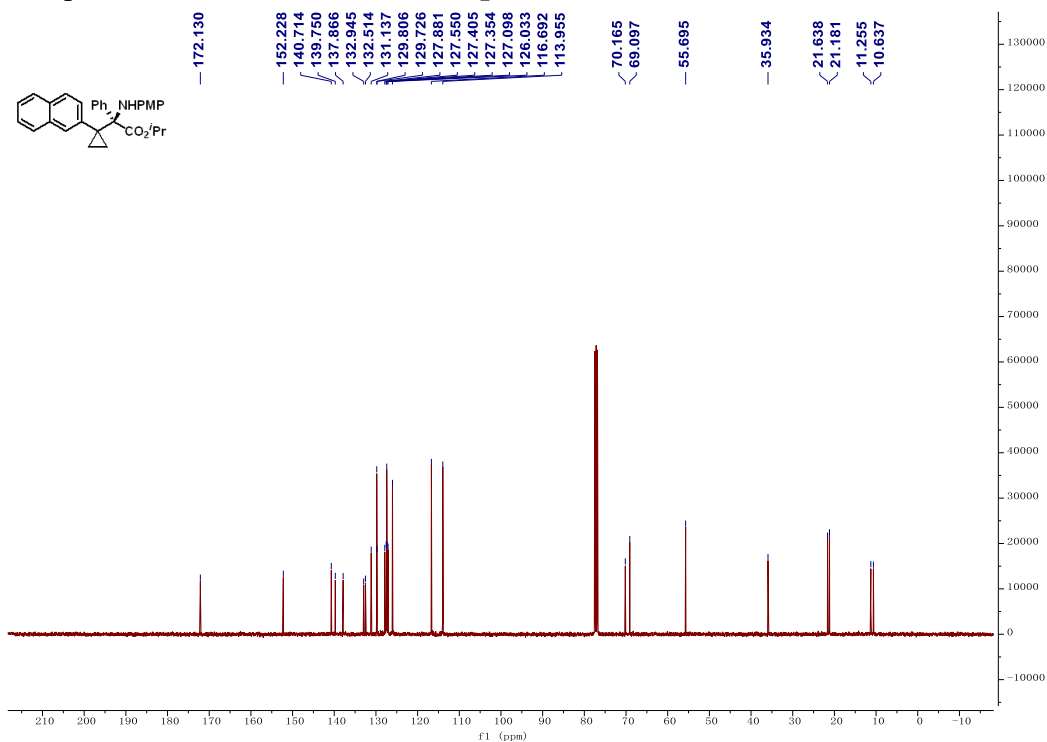

<sup>1</sup>H NMR-spectrum (400 MHz, CDCl<sub>3</sub>) of **3q**

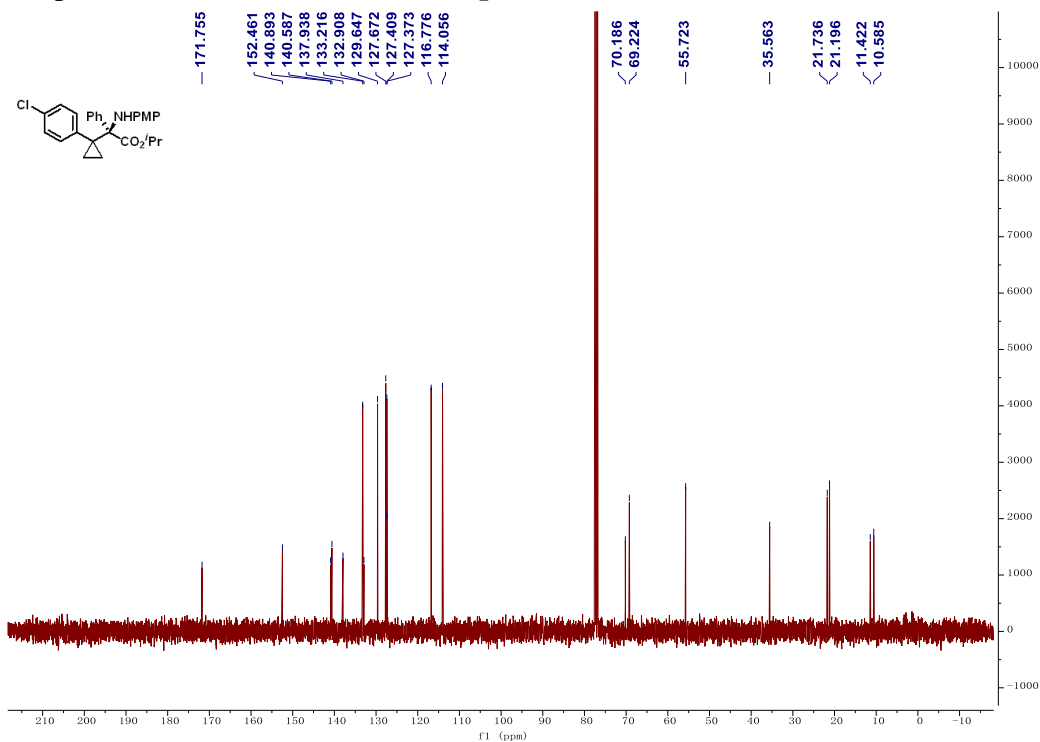

<sup>13</sup>C NMR-spectrum (100 MHz, CDCl<sub>3</sub>) of **3q**

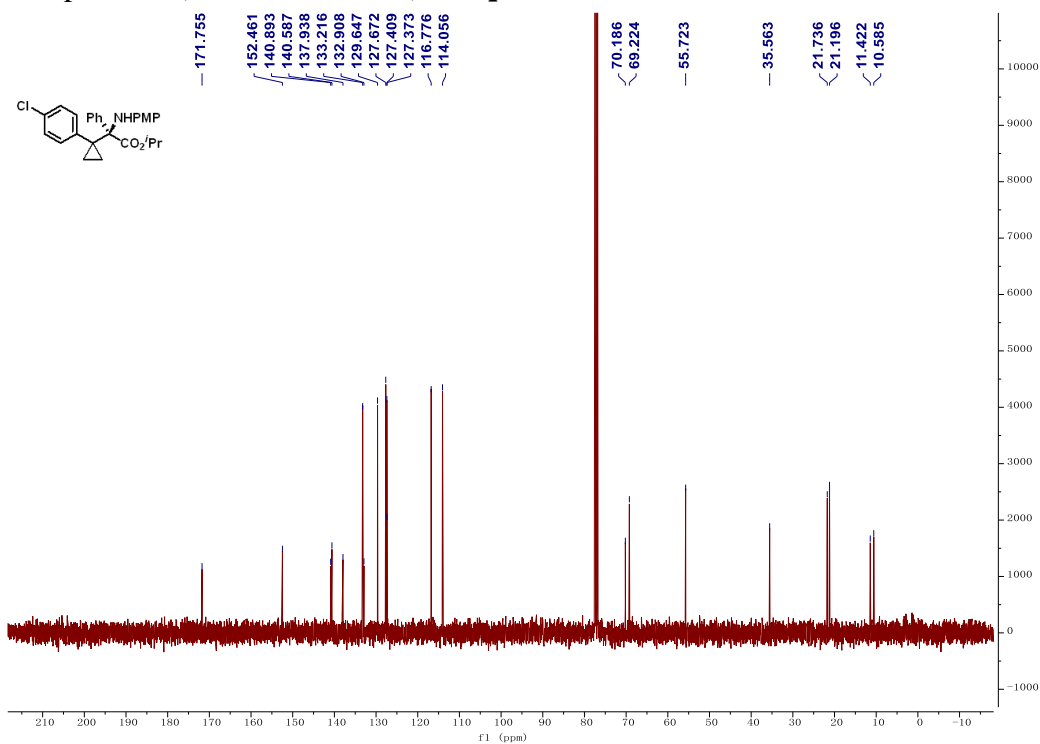

**<sup>1</sup>H NMR-spectrum (400 MHz, CDCl<sub>3</sub>) of 3r**

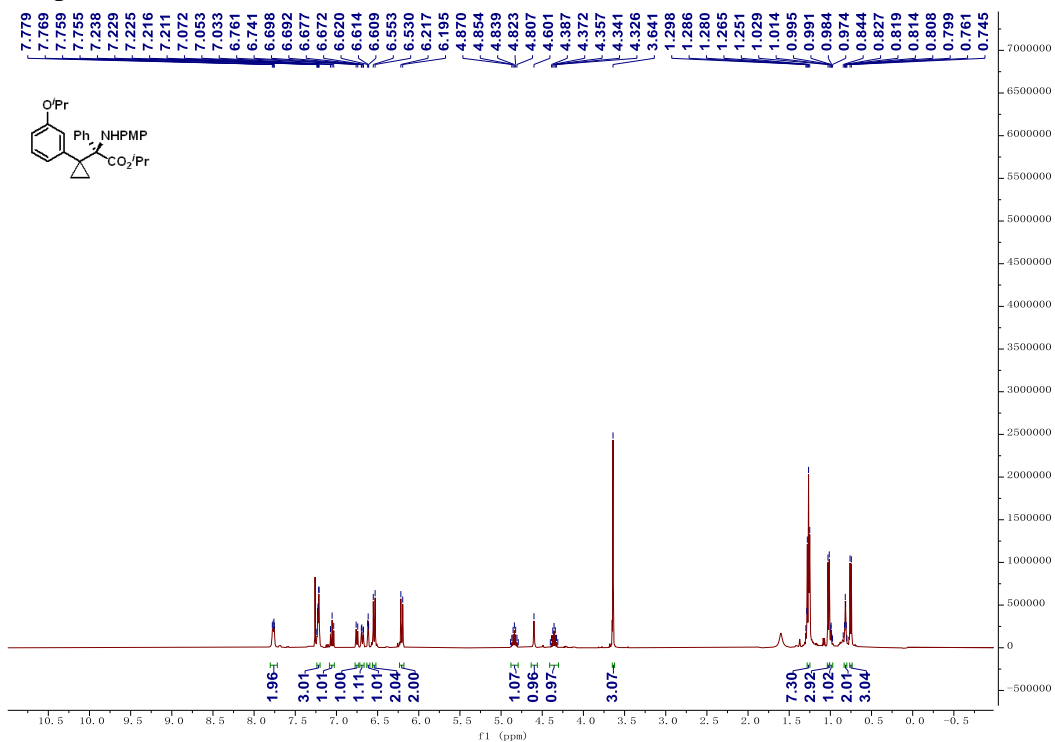

**<sup>13</sup>C NMR-spectrum (100 MHz, CDCl<sub>3</sub>) of 3r**

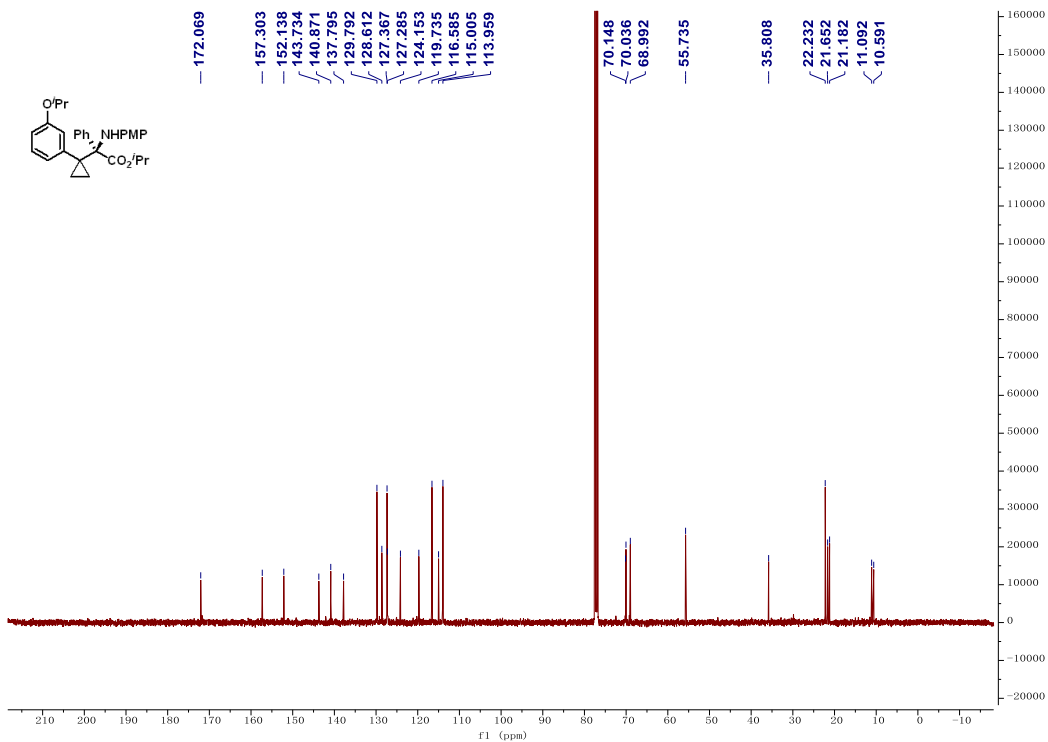



<sup>1</sup>H NMR-spectrum (400 MHz, DMSO-d<sub>6</sub>) of **3s**

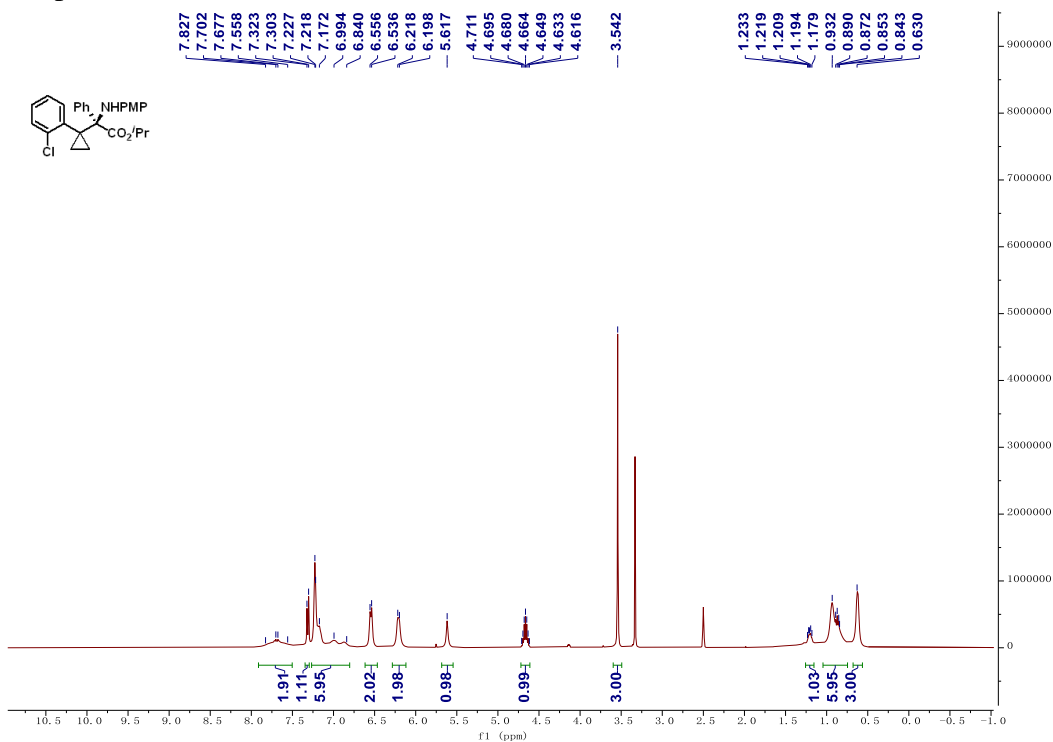

<sup>13</sup>C NMR-spectrum (100 MHz, DMSO-d<sub>6</sub>) of **3s**

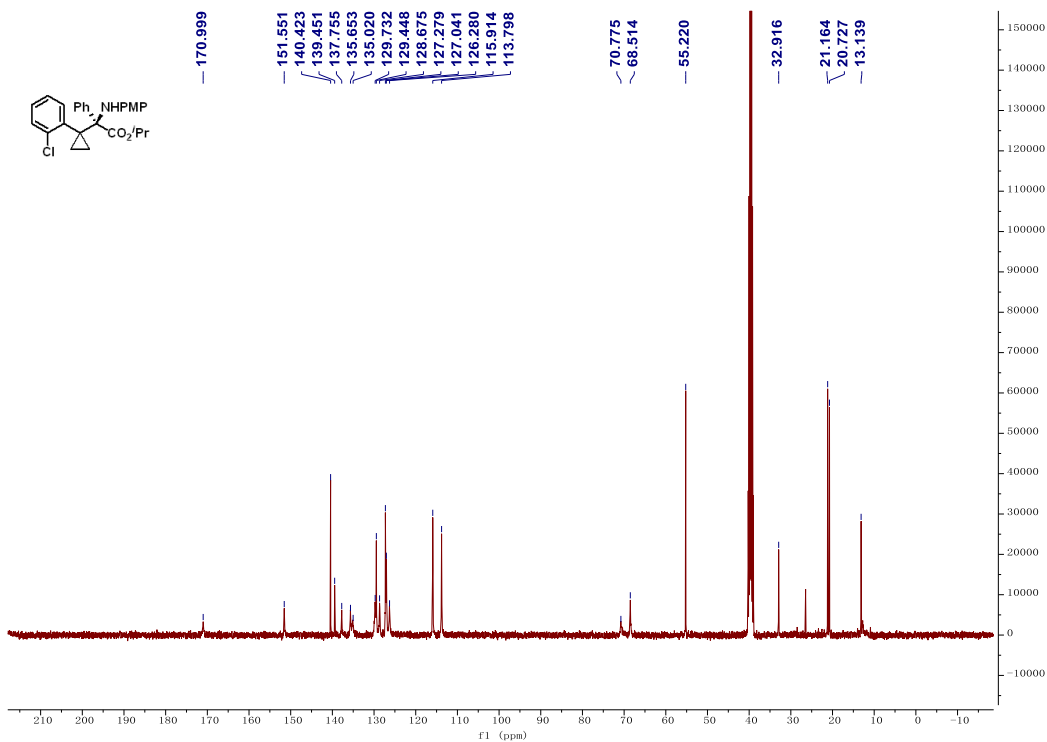

<sup>1</sup>H NMR-spectrum (400 MHz, CDCl<sub>3</sub>) of **3t**

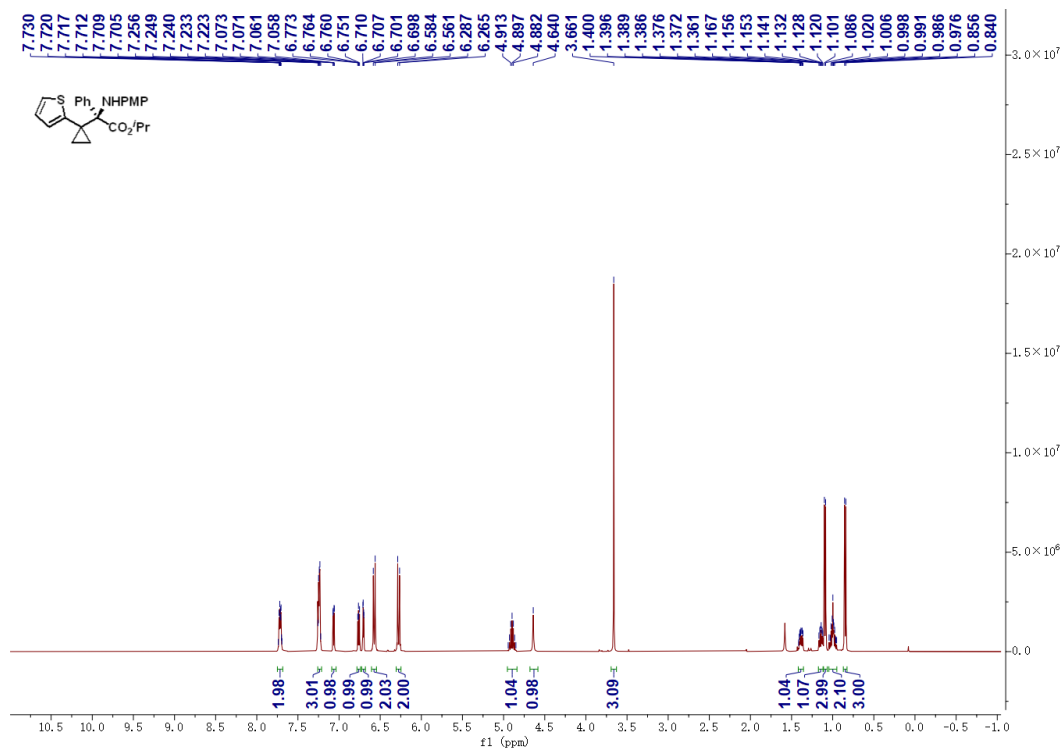

<sup>13</sup>C NMR-spectrum (100 MHz, CDCl<sub>3</sub>) of **3t**

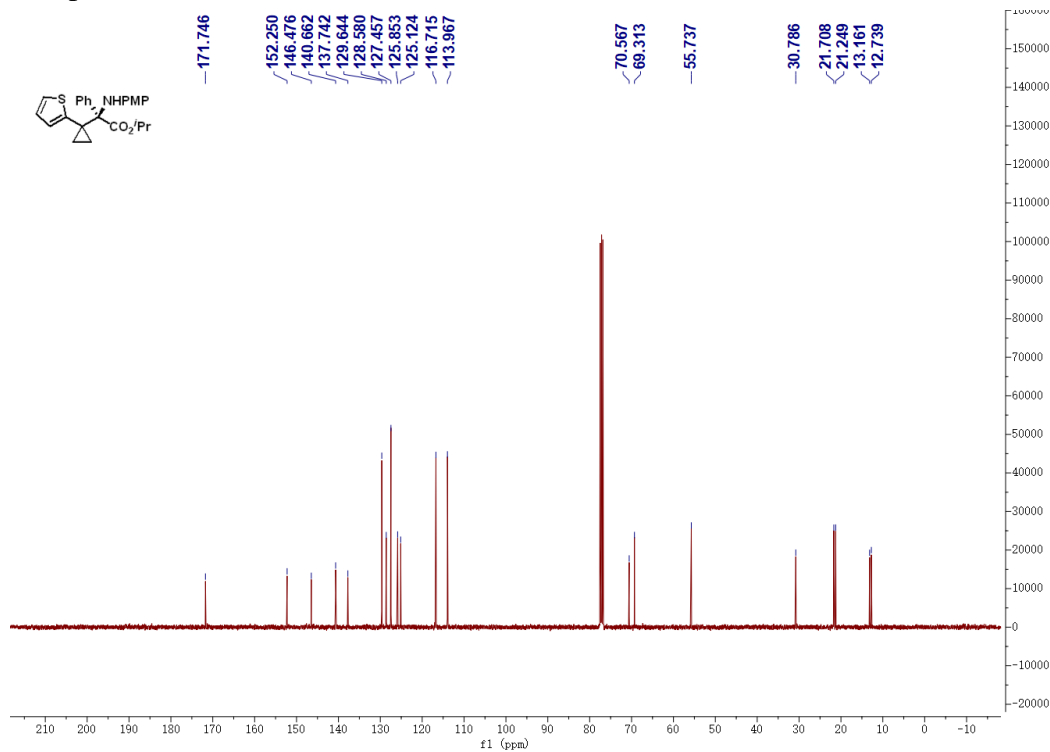

<sup>1</sup>H NMR-spectrum (400 MHz, CDCl<sub>3</sub>) of **4**

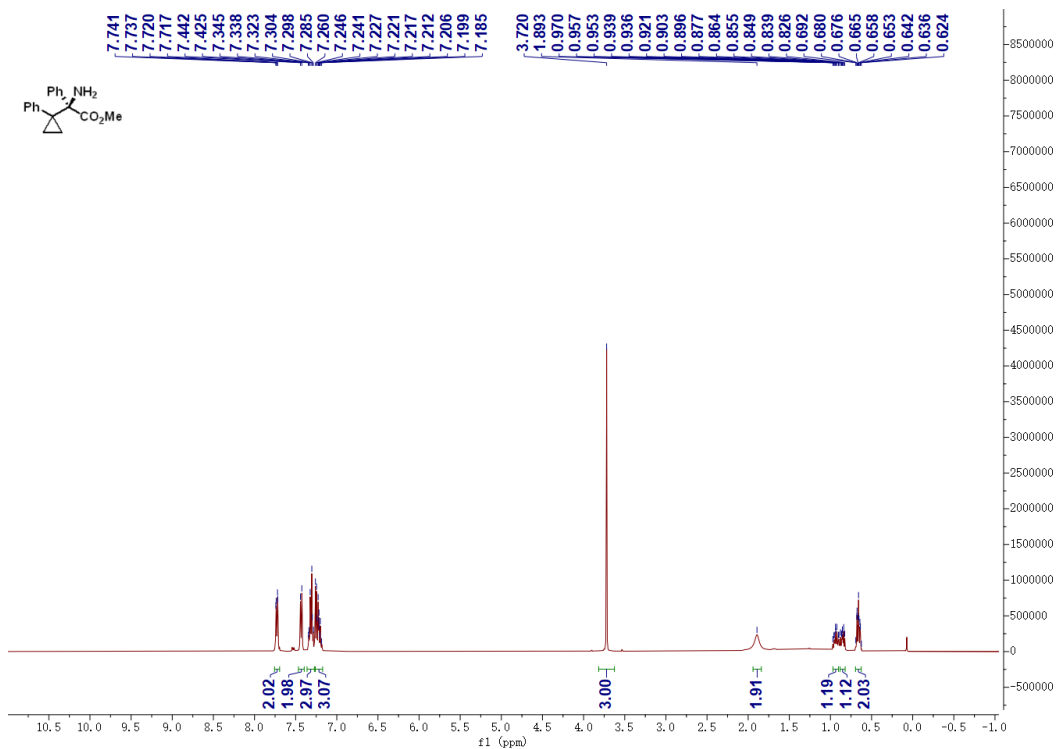

<sup>13</sup>C NMR-spectrum (100 MHz, CDCl<sub>3</sub>) of **4**

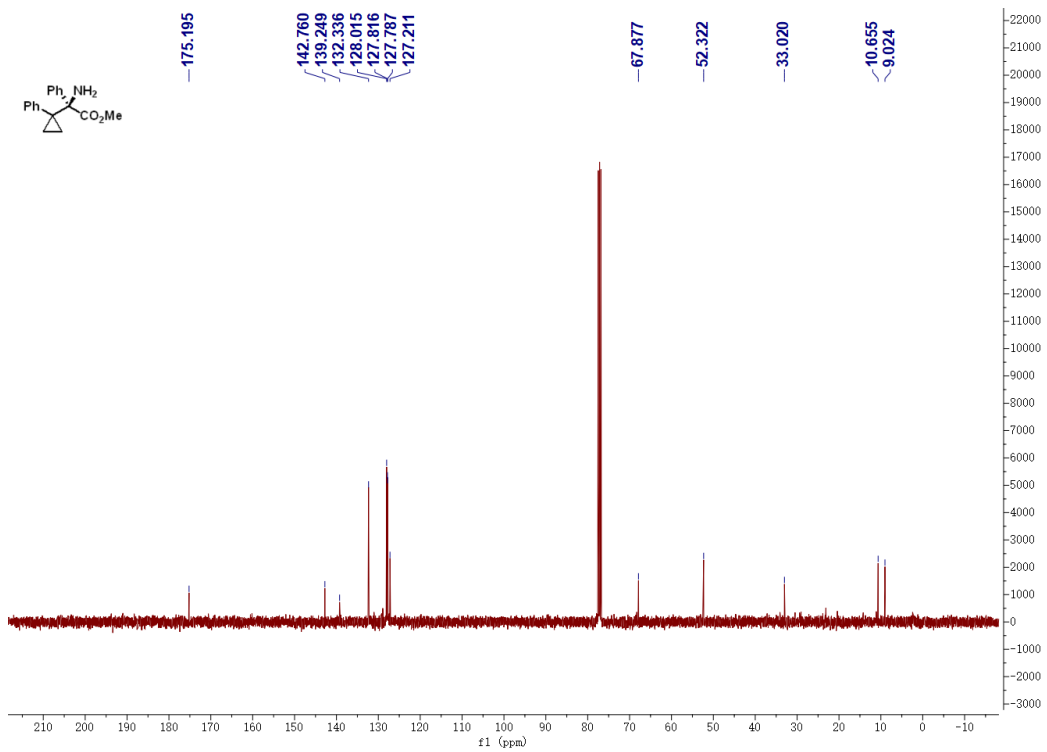

<sup>1</sup>H NMR-spectrum (400 MHz, CD<sub>3</sub>OD) of **5**

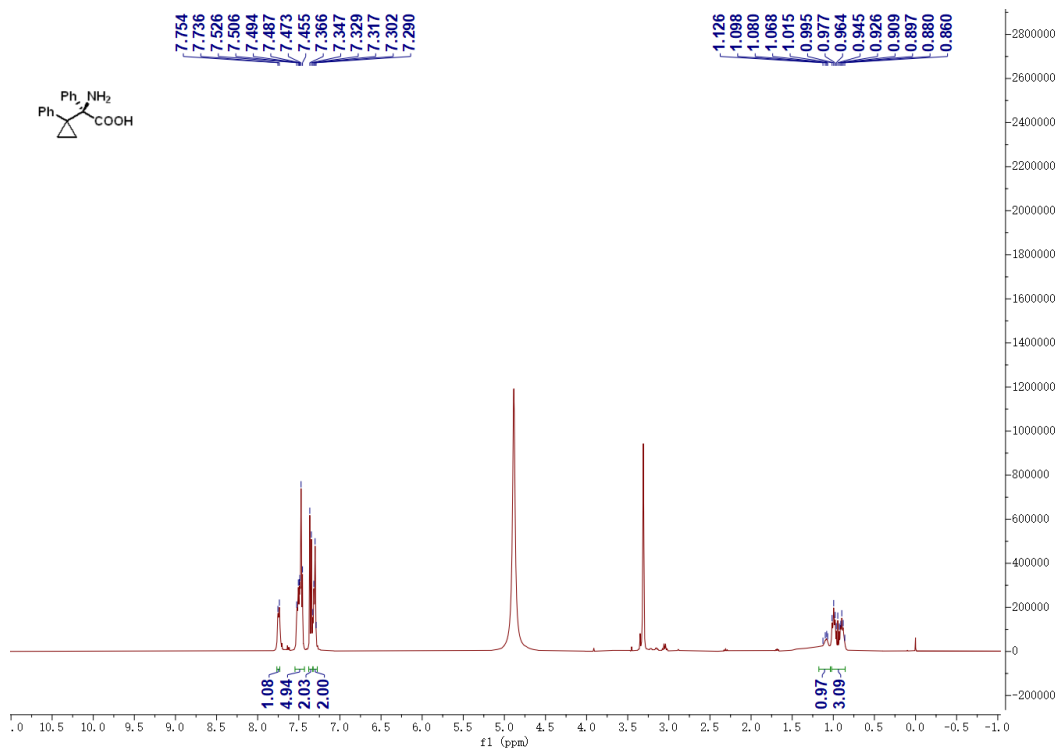

<sup>13</sup>C NMR-spectrum (100 MHz, CD<sub>3</sub>OD) of **5**

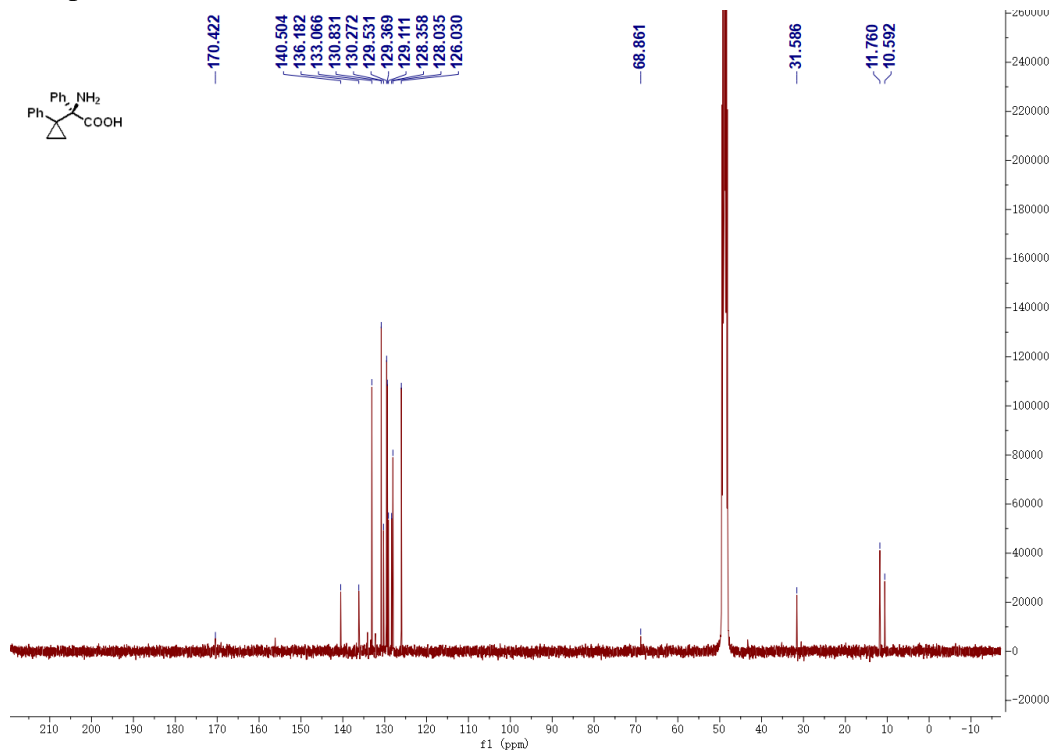

<sup>1</sup>H NMR-spectrum (400 MHz, CDCl<sub>3</sub>) of **6**

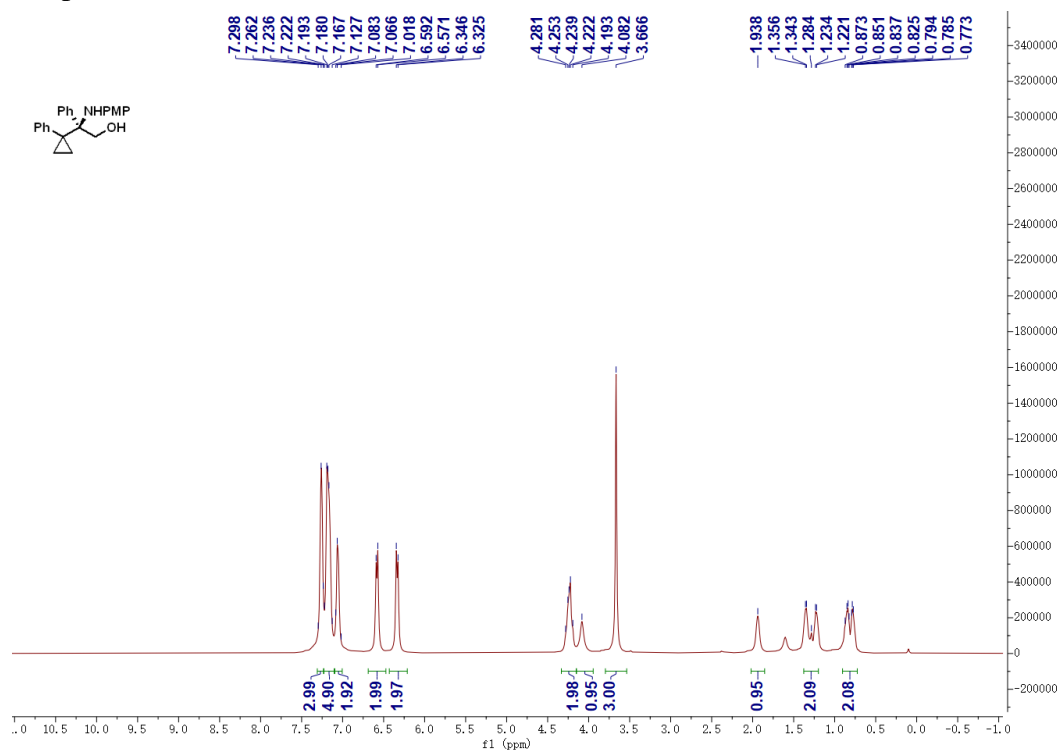

<sup>13</sup>C NMR-spectrum (100 MHz, CDCl<sub>3</sub>) of **6**

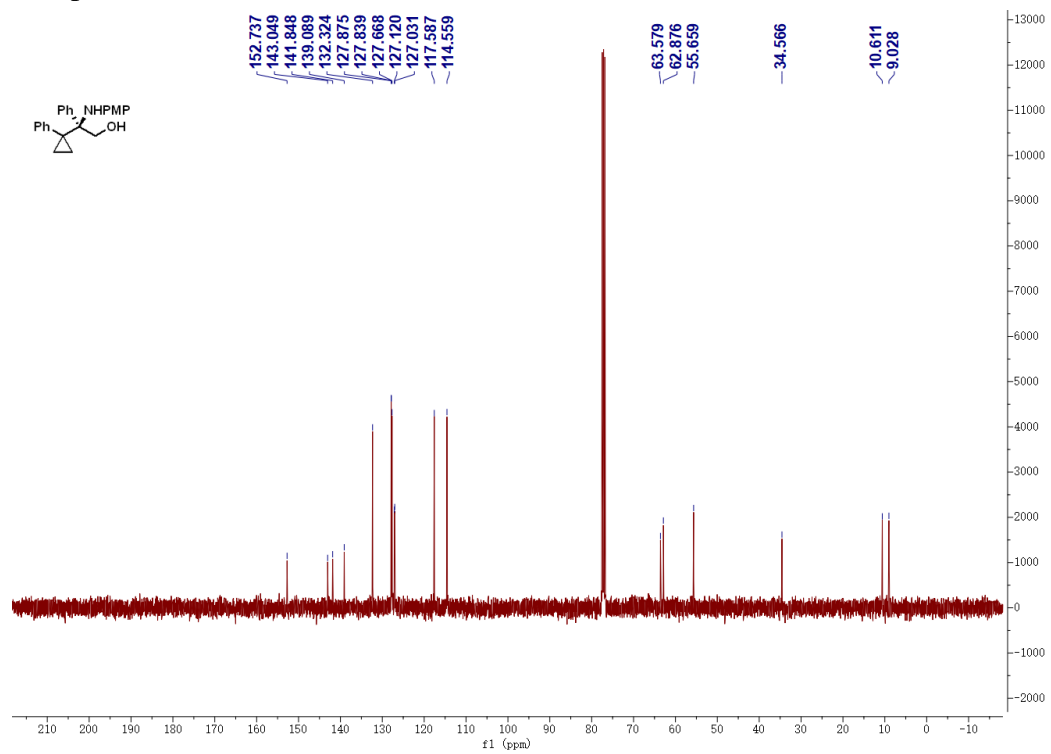

<sup>1</sup>H NMR-spectrum (400 MHz, CDCl<sub>3</sub>) of 7

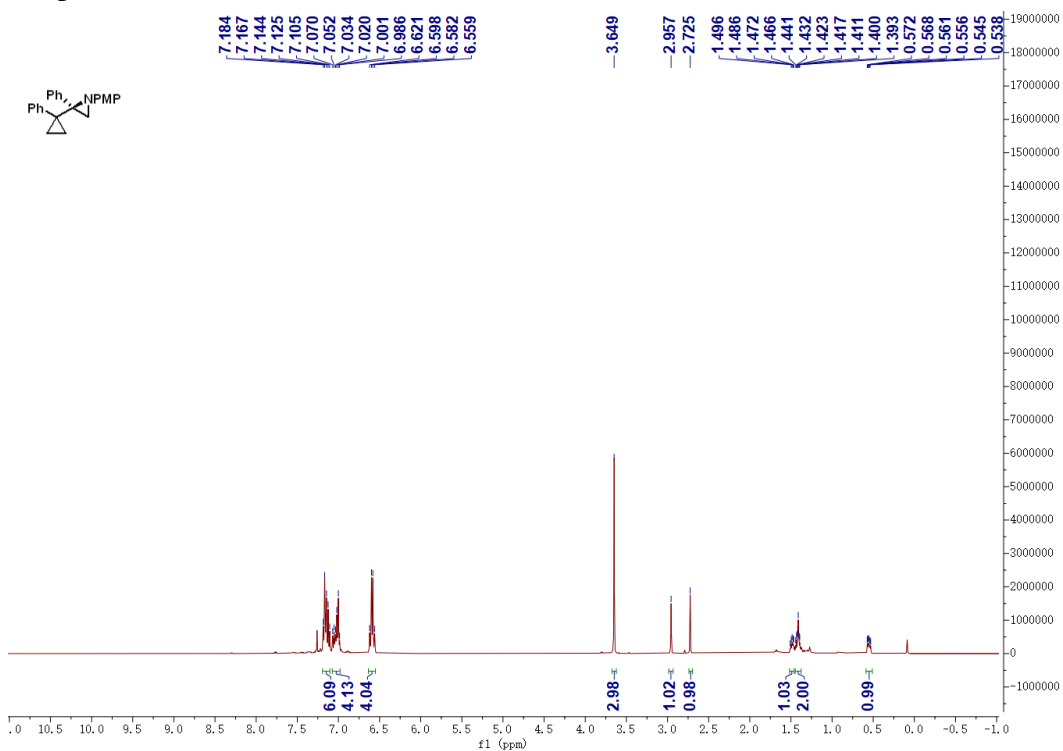

<sup>13</sup>C NMR-spectrum (100 MHz, CDCl<sub>3</sub>) of 7

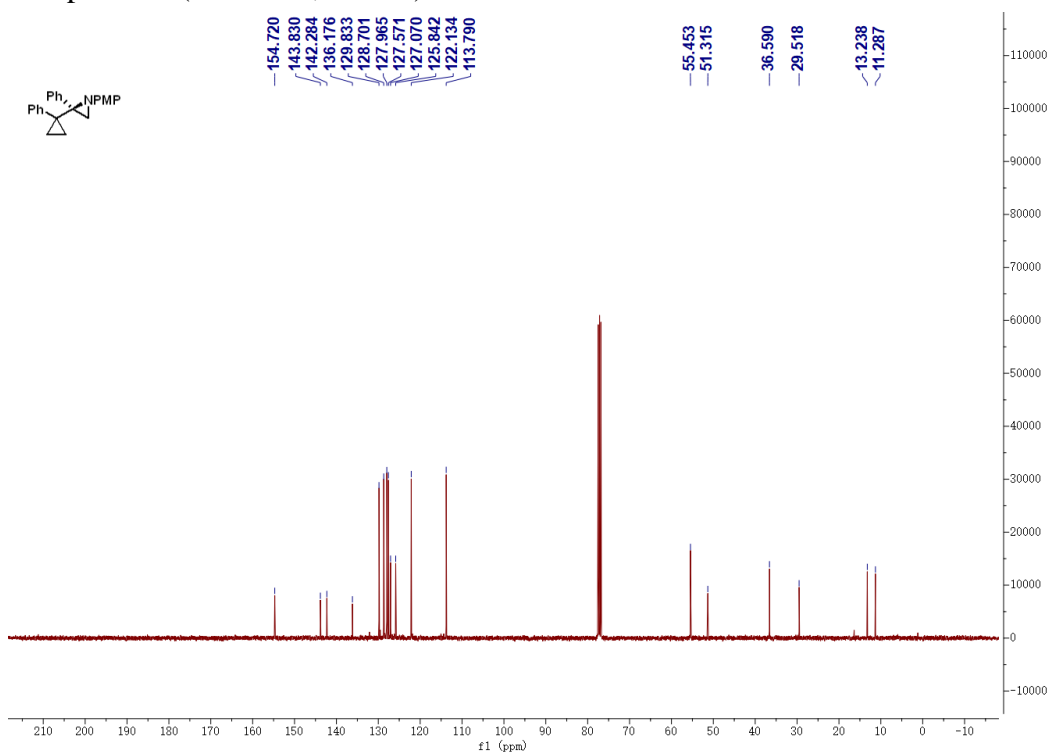

Supplement: d4qo01474j1.pdf [file d4qo01474j1.pdf]
